# Supplementary material
Source: publisher figshare collection journal article supplement (https://acs.figshare.com/ndownloader/files/4064710)
Supplement: Supplementary file 1 [file 4064710]

 
data_KC1FMI
  
_audit_creation_method            SHELXL-2012 
_chemical_name_systematic 
; 
 ? 
; 
_chemical_name_common             ? 
_chemical_melting_point           ? 
_chemical_formula_moiety          'C16 H13 N O' 
_chemical_formula_sum 
 'C16 H13 N O' 
_chemical_formula_weight          235.27 
  
loop_ 
 _atom_type_symbol 
 _atom_type_description 
 _atom_type_scat_dispersion_real 
 _atom_type_scat_dispersion_imag 
 _atom_type_scat_source 
 'C'  'C'   0.0181   0.0091 
 'International Tables Vol C Tables 4.2.6.8 and 6.1.1.4' 
 'H'  'H'   0.0000   0.0000 
 'International Tables Vol C Tables 4.2.6.8 and 6.1.1.4' 
 'N'  'N'   0.0311   0.0180 
 'International Tables Vol C Tables 4.2.6.8 and 6.1.1.4' 
 'O'  'O'   0.0492   0.0322 
 'International Tables Vol C Tables 4.2.6.8 and 6.1.1.4' 
  
_space_group_crystal_system       monoclinic 
_space_group_IT_number            15 
_space_group_name_H-M_alt         'C 2/c' 
_space_group_name_Hall            '-C 2yc' 
  
_shelx_space_group_comment 
; 
The symmetry employed for this shelxl refinement is uniquely defined 
by the following loop, which should always be used as a source of 
symmetry information in preference to the above space-group names. 
They are only intended as comments. 
; 
  
loop_ 
 _space_group_symop_operation_xyz 
 'x, y, z' 
 '-x, y, -z+1/2' 
 'x+1/2, y+1/2, z' 
 '-x+1/2, y+1/2, -z+1/2' 
 '-x, -y, -z' 
 'x, -y, z-1/2' 
 '-x+1/2, -y+1/2, -z' 
 'x+1/2, -y+1/2, z-1/2' 
  
_cell_length_a                    22.7298(8) 
_cell_length_b                    7.4458(3) 
_cell_length_c                    14.6820(5) 
_cell_angle_alpha                 90 
_cell_angle_beta                  106.3440(10) 
_cell_angle_gamma                 90 
_cell_volume                      2384.39(15) 
_cell_formula_units_Z             8 
_cell_measurement_temperature     90(2) 
_cell_measurement_reflns_used     9174 
_cell_measurement_theta_min       6.28 
_cell_measurement_theta_max       72.33 
  
_exptl_crystal_description        Plate 
_exptl_crystal_colour             Colorless 
_exptl_crystal_density_meas       ? 
_exptl_crystal_density_method     ? 
_exptl_crystal_density_diffrn     1.311 
_exptl_crystal_F_000              992 
_exptl_transmission_factor_min    ? 
_exptl_transmission_factor_max    ? 
_exptl_crystal_size_max           0.456 
_exptl_crystal_size_mid           0.386 
_exptl_crystal_size_min           0.078 
_exptl_absorpt_coefficient_mu     0.646 
_shelx_estimated_absorpt_T_min    0.757 
_shelx_estimated_absorpt_T_max    0.951 
_exptl_absorpt_correction_type    Multi-scan 
_exptl_absorpt_correction_T_min   0.7312 
_exptl_absorpt_correction_T_max   0.8649 
_exptl_absorpt_process_details    'SADABS 2012/1 (Sheldrick, 2012)' 
  
_exptl_special_details 
; 
 ? 
; 
  
_diffrn_ambient_temperature       90(2) 
_diffrn_radiation_wavelength      1.54178 
_diffrn_radiation_type            CuK\a 
_diffrn_source                    ? 
_diffrn_measurement_device_type   'Bruker APEX-II CCD' 
_diffrn_measurement_method        '\f and \w scans' 
_diffrn_detector_area_resol_mean  ? 
_diffrn_reflns_number             6343 
_diffrn_reflns_av_unetI/netI      0.0206 
_diffrn_reflns_av_R_equivalents   0.0194 
_diffrn_reflns_limit_h_min        -27 
_diffrn_reflns_limit_h_max        26 
_diffrn_reflns_limit_k_min        -8 
_diffrn_reflns_limit_k_max        8 
_diffrn_reflns_limit_l_min        -17 
_diffrn_reflns_limit_l_max        17 
_diffrn_reflns_theta_min          6.281 
_diffrn_reflns_theta_max          72.373 
_diffrn_reflns_theta_full         67.679 
_diffrn_measured_fraction_theta_max   0.952 
_diffrn_measured_fraction_theta_full  0.989 
_diffrn_reflns_Laue_measured_fraction_max    0.952 
_diffrn_reflns_Laue_measured_fraction_full   0.989 
_diffrn_reflns_point_group_measured_fraction_max   0.952 
_diffrn_reflns_point_group_measured_fraction_full  0.989 
_reflns_number_total              2248 
_reflns_number_gt                 2213 
_reflns_threshold_expression      'I > 2\s(I)' 
_reflns_Friedel_coverage          0.000 
_reflns_Friedel_fraction_max      . 
_reflns_Friedel_fraction_full     . 
  
_reflns_special_details 
; 
 Reflections were merged by SHELXL according to the crystal 
 class for the calculation of statistics and refinement. 
  
 _reflns_Friedel_fraction is defined as the number of unique 
 Friedel pairs measured divided by the number that would be 
 possible theoretically, ignoring centric projections and 
 systematic absences. 
; 
  
_computing_data_collection        'Apex2 (2012.2-0) (Bruker, 2012)' 
_computing_cell_refinement        'SAINT (8.18C) (Bruker, 2012)' 
_computing_data_reduction         'SAINT (8.18C) (Bruker, 2012)' 
_computing_structure_solution     'SHELXS-97 (Sheldrick, 2008)' 
_computing_structure_refinement   'SHELXL-2012 (Sheldrick, 2012)' 
_computing_molecular_graphics     'Bruker SHELXTL' 
_computing_publication_material   'Bruker SHELXTL' 
  
_refine_special_details 
; 
 ? 
; 
_refine_ls_structure_factor_coef  Fsqd 
_refine_ls_matrix_type            full 
_refine_ls_weighting_scheme       calc 
_refine_ls_weighting_details 
; 
 w=1/[\s^2^(Fo^2^)+(0.0502P)^2^+1.5504P] 
 where P=(Fo^2^+2Fc^2^)/3 
; 
_atom_sites_solution_primary      ? 
_atom_sites_solution_secondary    ? 
_atom_sites_solution_hydrogens    difmap 
_refine_ls_hydrogen_treatment     refall 
_refine_ls_extinction_method      none 
_refine_ls_extinction_coef        . 
_refine_ls_number_reflns          2248 
_refine_ls_number_parameters      215 
_refine_ls_number_restraints      0 
_refine_ls_R_factor_all           0.0346 
_refine_ls_R_factor_gt            0.0342 
_refine_ls_wR_factor_ref          0.0916 
_refine_ls_wR_factor_gt           0.0912 
_refine_ls_goodness_of_fit_ref    1.057 
_refine_ls_restrained_S_all       1.057 
_refine_ls_shift/su_max           0.001 
_refine_ls_shift/su_mean          0.000 
  
loop_ 
 _atom_site_label 
 _atom_site_type_symbol 
 _atom_site_fract_x 
 _atom_site_fract_y 
 _atom_site_fract_z 
 _atom_site_U_iso_or_equiv 
 _atom_site_adp_type 
 _atom_site_occupancy 
 _atom_site_site_symmetry_order 
 _atom_site_calc_flag 
 _atom_site_refinement_flags_posn 
 _atom_site_refinement_flags_adp 
 _atom_site_refinement_flags_occupancy 
 _atom_site_disorder_assembly 
 _atom_site_disorder_group 
C1 C 0.32353(5) 0.55431(13) 0.76139(7) 0.0165(2) Uani 1 1 d . . . . . 
H1 H 0.2567(6) 0.5359(18) 0.6361(11) 0.023(3) Uiso 1 1 d . . . . . 
N1 N 0.26543(4) 0.53969(12) 0.69931(6) 0.0169(2) Uani 1 1 d . . . . . 
C2 C 0.37990(5) 0.57544(14) 0.74256(8) 0.0205(2) Uani 1 1 d . . . . . 
H2 H 0.3825(6) 0.5835(19) 0.6788(11) 0.029(3) Uiso 1 1 d . . . . . 
C3 C 0.43112(5) 0.59272(15) 0.81976(8) 0.0229(3) Uani 1 1 d . . . . . 
H3 H 0.4717(7) 0.6106(19) 0.8100(10) 0.030(4) Uiso 1 1 d . . . . . 
C4 C 0.42611(5) 0.58907(15) 0.91282(8) 0.0218(2) Uani 1 1 d . . . . . 
H4 H 0.4630(6) 0.6060(18) 0.9680(9) 0.024(3) Uiso 1 1 d . . . . . 
C5 C 0.37006(5) 0.56567(14) 0.93102(7) 0.0183(2) Uani 1 1 d . . . . . 
H5 H 0.3675(6) 0.5625(17) 0.9973(9) 0.019(3) Uiso 1 1 d . . . . . 
C6 C 0.31744(5) 0.54793(13) 0.85432(7) 0.0155(2) Uani 1 1 d . . . . . 
C7 C 0.25246(5) 0.53002(13) 0.84514(7) 0.0149(2) Uani 1 1 d . . . . . 
C8 C 0.22280(5) 0.52623(13) 0.74750(7) 0.0156(2) Uani 1 1 d . . . . . 
O8 O 0.26286(3) 0.47852(10) 1.00585(5) 0.0206(2) Uani 1 1 d . . . . . 
C9 C 0.22813(5) 0.50634(13) 0.92530(7) 0.0155(2) Uani 1 1 d . . . . . 
C10 C 0.16056(5) 0.51206(14) 0.91373(7) 0.0165(2) Uani 1 1 d . . . . . 
C11 C 0.13414(5) 0.37420(15) 0.95325(7) 0.0193(2) Uani 1 1 d . . . . . 
H11 H 0.1598(6) 0.2740(18) 0.9857(9) 0.021(3) Uiso 1 1 d . . . . . 
C12 C 0.07173(5) 0.37734(16) 0.94447(8) 0.0248(3) Uani 1 1 d . . . . . 
H12 H 0.0534(6) 0.276(2) 0.9723(10) 0.030(4) Uiso 1 1 d . . . . . 
C13 C 0.03573(5) 0.51940(18) 0.89858(9) 0.0282(3) Uani 1 1 d . . . . . 
H13 H -0.0077(7) 0.522(2) 0.8928(11) 0.036(4) Uiso 1 1 d . . . . . 
C14 C 0.06242(5) 0.65903(17) 0.86162(8) 0.0269(3) Uani 1 1 d . . . . . 
H14 H 0.0375(7) 0.762(2) 0.8303(10) 0.033(4) Uiso 1 1 d . . . . . 
C15 C 0.12455(5) 0.65508(15) 0.86853(7) 0.0213(2) Uani 1 1 d . . . . . 
H15 H 0.1435(6) 0.7538(19) 0.8428(9) 0.024(3) Uiso 1 1 d . . . . . 
C16 C 0.15717(5) 0.51079(15) 0.69125(7) 0.0192(2) Uani 1 1 d . . . . . 
H16A H 0.1392(6) 0.632(2) 0.6751(10) 0.031(4) Uiso 1 1 d . . . . . 
H16B H 0.1332(6) 0.4453(18) 0.7272(9) 0.022(3) Uiso 1 1 d . . . . . 
H16C H 0.1543(6) 0.4483(19) 0.6318(11) 0.028(3) Uiso 1 1 d . . . . . 
  
loop_ 
 _atom_site_aniso_label 
 _atom_site_aniso_U_11 
 _atom_site_aniso_U_22 
 _atom_site_aniso_U_33 
 _atom_site_aniso_U_23 
 _atom_site_aniso_U_13 
 _atom_site_aniso_U_12 
C1 0.0207(5) 0.0139(5) 0.0153(5) -0.0005(4) 0.0056(4) -0.0002(4) 
N1 0.0224(5) 0.0195(5) 0.0094(4) -0.0007(3) 0.0053(3) -0.0017(3) 
C2 0.0264(6) 0.0181(5) 0.0213(5) 0.0001(4) 0.0137(4) 0.0003(4) 
C3 0.0199(5) 0.0212(5) 0.0313(6) 0.0021(4) 0.0130(4) 0.0007(4) 
C4 0.0171(5) 0.0230(6) 0.0241(6) 0.0028(4) 0.0037(4) 0.0001(4) 
C5 0.0194(5) 0.0185(5) 0.0161(5) 0.0022(4) 0.0036(4) -0.0004(4) 
C6 0.0197(5) 0.0130(5) 0.0150(5) 0.0004(4) 0.0066(4) -0.0004(4) 
C7 0.0168(5) 0.0146(5) 0.0130(5) 0.0000(4) 0.0036(4) -0.0010(4) 
C8 0.0206(5) 0.0131(5) 0.0134(5) 0.0000(4) 0.0051(4) -0.0009(4) 
O8 0.0182(4) 0.0306(4) 0.0123(4) 0.0028(3) 0.0033(3) -0.0003(3) 
C9 0.0187(5) 0.0149(5) 0.0128(5) -0.0006(3) 0.0042(4) -0.0013(4) 
C10 0.0177(5) 0.0210(5) 0.0105(5) -0.0031(4) 0.0035(4) -0.0012(4) 
C11 0.0203(5) 0.0234(5) 0.0137(5) -0.0018(4) 0.0041(4) -0.0027(4) 
C12 0.0217(5) 0.0332(6) 0.0206(5) -0.0049(5) 0.0077(4) -0.0080(4) 
C13 0.0160(5) 0.0430(7) 0.0250(6) -0.0096(5) 0.0047(4) -0.0010(5) 
C14 0.0233(6) 0.0321(6) 0.0225(5) -0.0034(5) 0.0020(4) 0.0075(5) 
C15 0.0231(5) 0.0224(6) 0.0177(5) -0.0012(4) 0.0045(4) 0.0013(4) 
C16 0.0210(5) 0.0216(6) 0.0127(5) -0.0005(4) 0.0011(4) -0.0026(4) 
  
_geom_special_details 
; 
 All esds (except the esd in the dihedral angle between two l.s. planes) 
 are estimated using the full covariance matrix.  The cell esds are taken 
 into account individually in the estimation of esds in distances, angles 
 and torsion angles; correlations between esds in cell parameters are only 
 used when they are defined by crystal symmetry.  An approximate (isotropic) 
 treatment of cell esds is used for estimating esds involving l.s. planes. 
; 
  
loop_ 
 _geom_bond_atom_site_label_1 
 _geom_bond_atom_site_label_2 
 _geom_bond_distance 
 _geom_bond_site_symmetry_2 
 _geom_bond_publ_flag 
C1 N1 1.3817(14) . ? 
C1 C2 1.3937(15) . ? 
C1 C6 1.4103(14) . ? 
N1 C8 1.3548(14) . ? 
N1 H1 0.892(15) . ? 
C2 C3 1.3835(16) . ? 
C2 H2 0.957(15) . ? 
C3 C4 1.4029(16) . ? 
C3 H3 0.983(14) . ? 
C4 C5 1.3843(15) . ? 
C4 H4 0.996(13) . ? 
C5 C6 1.3995(14) . ? 
C5 H5 0.992(13) . ? 
C6 C7 1.4510(14) . ? 
C7 C8 1.4023(14) . ? 
C7 C9 1.4451(14) . ? 
C8 C16 1.4923(14) . ? 
O8 C9 1.2406(13) . ? 
C9 C10 1.4975(14) . ? 
C10 C15 1.3923(15) . ? 
C10 C11 1.3954(15) . ? 
C11 C12 1.3882(15) . ? 
C11 H11 0.984(13) . ? 
C12 C13 1.3899(18) . ? 
C12 H12 1.003(15) . ? 
C13 C14 1.3887(19) . ? 
C13 H13 0.967(16) . ? 
C14 C15 1.3876(16) . ? 
C14 H14 0.986(15) . ? 
C15 H15 0.980(14) . ? 
C16 H16A 0.993(16) . ? 
C16 H16B 0.987(14) . ? 
C16 H16C 0.975(15) . ? 
  
loop_ 
 _geom_angle_atom_site_label_1 
 _geom_angle_atom_site_label_2 
 _geom_angle_atom_site_label_3 
 _geom_angle 
 _geom_angle_site_symmetry_1 
 _geom_angle_site_symmetry_3 
 _geom_angle_publ_flag 
N1 C1 C2 129.75(10) . . ? 
N1 C1 C6 107.45(9) . . ? 
C2 C1 C6 122.80(10) . . ? 
C8 N1 C1 110.64(9) . . ? 
C8 N1 H1 123.9(9) . . ? 
C1 N1 H1 125.5(9) . . ? 
C3 C2 C1 117.18(10) . . ? 
C3 C2 H2 121.7(9) . . ? 
C1 C2 H2 121.0(8) . . ? 
C2 C3 C4 121.05(10) . . ? 
C2 C3 H3 120.1(8) . . ? 
C4 C3 H3 118.8(8) . . ? 
C5 C4 C3 121.46(10) . . ? 
C5 C4 H4 117.9(8) . . ? 
C3 C4 H4 120.6(8) . . ? 
C4 C5 C6 118.76(10) . . ? 
C4 C5 H5 120.2(7) . . ? 
C6 C5 H5 121.0(7) . . ? 
C5 C6 C1 118.75(9) . . ? 
C5 C6 C7 134.47(9) . . ? 
C1 C6 C7 106.72(9) . . ? 
C8 C7 C9 130.25(10) . . ? 
C8 C7 C6 106.30(9) . . ? 
C9 C7 C6 123.26(9) . . ? 
N1 C8 C7 108.89(9) . . ? 
N1 C8 C16 117.85(9) . . ? 
C7 C8 C16 133.27(10) . . ? 
O8 C9 C7 120.67(9) . . ? 
O8 C9 C10 118.03(9) . . ? 
C7 C9 C10 121.29(9) . . ? 
C15 C10 C11 119.79(10) . . ? 
C15 C10 C9 121.49(9) . . ? 
C11 C10 C9 118.65(9) . . ? 
C12 C11 C10 119.81(10) . . ? 
C12 C11 H11 120.6(7) . . ? 
C10 C11 H11 119.5(7) . . ? 
C11 C12 C13 120.30(11) . . ? 
C11 C12 H12 118.7(8) . . ? 
C13 C12 H12 120.9(8) . . ? 
C14 C13 C12 119.80(11) . . ? 
C14 C13 H13 119.8(9) . . ? 
C12 C13 H13 120.4(9) . . ? 
C15 C14 C13 120.20(11) . . ? 
C15 C14 H14 119.4(9) . . ? 
C13 C14 H14 120.4(9) . . ? 
C14 C15 C10 120.05(10) . . ? 
C14 C15 H15 120.3(8) . . ? 
C10 C15 H15 119.6(8) . . ? 
C8 C16 H16A 110.0(8) . . ? 
C8 C16 H16B 111.0(8) . . ? 
H16A C16 H16B 109.0(11) . . ? 
C8 C16 H16C 109.7(8) . . ? 
H16A C16 H16C 107.5(11) . . ? 
H16B C16 H16C 109.5(12) . . ? 
  
loop_ 
 _geom_torsion_atom_site_label_1 
 _geom_torsion_atom_site_label_2 
 _geom_torsion_atom_site_label_3 
 _geom_torsion_atom_site_label_4 
 _geom_torsion 
 _geom_torsion_site_symmetry_1 
 _geom_torsion_site_symmetry_2 
 _geom_torsion_site_symmetry_3 
 _geom_torsion_site_symmetry_4 
 _geom_torsion_publ_flag 
C2 C1 N1 C8 -178.16(10) . . . . ? 
C6 C1 N1 C8 0.62(11) . . . . ? 
N1 C1 C2 C3 177.81(10) . . . . ? 
C6 C1 C2 C3 -0.80(15) . . . . ? 
C1 C2 C3 C4 -0.04(16) . . . . ? 
C2 C3 C4 C5 0.89(17) . . . . ? 
C3 C4 C5 C6 -0.90(16) . . . . ? 
C4 C5 C6 C1 0.09(15) . . . . ? 
C4 C5 C6 C7 -176.79(11) . . . . ? 
N1 C1 C6 C5 -178.10(9) . . . . ? 
C2 C1 C6 C5 0.78(15) . . . . ? 
N1 C1 C6 C7 -0.42(11) . . . . ? 
C2 C1 C6 C7 178.46(9) . . . . ? 
C5 C6 C7 C8 177.24(11) . . . . ? 
C1 C6 C7 C8 0.09(11) . . . . ? 
C5 C6 C7 C9 -7.35(17) . . . . ? 
C1 C6 C7 C9 175.50(9) . . . . ? 
C1 N1 C8 C7 -0.56(11) . . . . ? 
C1 N1 C8 C16 179.52(9) . . . . ? 
C9 C7 C8 N1 -174.69(10) . . . . ? 
C6 C7 C8 N1 0.28(11) . . . . ? 
C9 C7 C8 C16 5.21(18) . . . . ? 
C6 C7 C8 C16 -179.82(10) . . . . ? 
C8 C7 C9 O8 165.45(10) . . . . ? 
C6 C7 C9 O8 -8.78(15) . . . . ? 
C8 C7 C9 C10 -13.72(16) . . . . ? 
C6 C7 C9 C10 172.06(9) . . . . ? 
O8 C9 C10 C15 128.40(11) . . . . ? 
C7 C9 C10 C15 -52.41(14) . . . . ? 
O8 C9 C10 C11 -48.65(13) . . . . ? 
C7 C9 C10 C11 130.54(10) . . . . ? 
C15 C10 C11 C12 2.17(15) . . . . ? 
C9 C10 C11 C12 179.27(9) . . . . ? 
C10 C11 C12 C13 -1.60(16) . . . . ? 
C11 C12 C13 C14 -0.20(17) . . . . ? 
C12 C13 C14 C15 1.44(17) . . . . ? 
C13 C14 C15 C10 -0.86(16) . . . . ? 
C11 C10 C15 C14 -0.94(15) . . . . ? 
C9 C10 C15 C14 -177.96(9) . . . . ? 
  
loop_ 
 _geom_hbond_atom_site_label_D 
 _geom_hbond_atom_site_label_H 
 _geom_hbond_atom_site_label_A 
 _geom_hbond_distance_DH 
 _geom_hbond_distance_HA 
 _geom_hbond_distance_DA 
 _geom_hbond_angle_DHA 
 _geom_hbond_site_symmetry_A 
N1 H1 O8  0.892(15) 1.960(15) 2.8277(12) 163.6(13) 6_565 
  
_refine_diff_density_max    0.266 
_refine_diff_density_min   -0.207 
_refine_diff_density_rms    0.037 
  
_shelxl_version_number 2012-6 
  
_shelx_res_file 
; 
TITL KC1Fmi in C2/c  FINAL ALL DATA MERGE-I 2JAN2013 
CELL 1.54178  22.7298   7.4458  14.6820  90.000 106.344  90.000 
ZERR    8.00   0.0008   0.0003   0.0005   0.000   0.001   0.000 
LATT  7 
SYMM -X, Y, 0.5-Z 
SFAC C H N O 
UNIT 128 104 8 8 
L.S. 19 
ACTA 
BOND $H 
FMAP 2 
PLAN 12 
CONF 
HTAB 
EQIV $1 x, -y+1, z-1/2 
HTAB N1 O8_$1 
SIZE 0.078 0.386 0.456 
TEMP -183.000 
WGHT    0.050200    1.550400 
FVAR       0.17928 
C1    1    0.323526    0.554309    0.761391    11.00000    0.02073    0.01391 = 
         0.01528   -0.00050    0.00555   -0.00021 
H1    2    0.256672    0.535940    0.636146    11.00000    0.02293 
N1    3    0.265431    0.539686    0.699306    11.00000    0.02235    0.01950 = 
         0.00937   -0.00073    0.00528   -0.00170 
C2    1    0.379898    0.575444    0.742564    11.00000    0.02638    0.01808 = 
         0.02131    0.00010    0.01367    0.00029 
H2    2    0.382540    0.583463    0.678757    11.00000    0.02870 
C3    1    0.431125    0.592718    0.819758    11.00000    0.01987    0.02117 = 
         0.03127    0.00214    0.01301    0.00072 
H3    2    0.471747    0.610606    0.809975    11.00000    0.02958 
C4    1    0.426111    0.589067    0.912819    11.00000    0.01709    0.02300 = 
         0.02405    0.00283    0.00367    0.00011 
H4    2    0.462972    0.606035    0.968005    11.00000    0.02445 
C5    1    0.370064    0.565671    0.931022    11.00000    0.01942    0.01852 = 
         0.01609    0.00215    0.00361   -0.00044 
H5    2    0.367517    0.562549    0.997330    11.00000    0.01871 
C6    1    0.317438    0.547928    0.854317    11.00000    0.01970    0.01298 = 
         0.01501    0.00041    0.00663   -0.00040 
C7    1    0.252460    0.530016    0.845144    11.00000    0.01680    0.01456 = 
         0.01302   -0.00003    0.00358   -0.00105 
C8    1    0.222801    0.526226    0.747502    11.00000    0.02061    0.01311 = 
         0.01338    0.00001    0.00513   -0.00088 
O8    4    0.262857    0.478520    1.005850    11.00000    0.01821    0.03063 = 
         0.01225    0.00276    0.00328   -0.00031 
C9    1    0.228131    0.506341    0.925304    11.00000    0.01874    0.01491 = 
         0.01282   -0.00057    0.00421   -0.00126 
C10   1    0.160562    0.512063    0.913732    11.00000    0.01773    0.02098 = 
         0.01051   -0.00308    0.00352   -0.00118 
C11   1    0.134143    0.374196    0.953247    11.00000    0.02029    0.02335 = 
         0.01374   -0.00184    0.00415   -0.00269 
H11   2    0.159822    0.273998    0.985676    11.00000    0.02143 
C12   1    0.071727    0.377337    0.944475    11.00000    0.02173    0.03320 = 
         0.02064   -0.00486    0.00772   -0.00800 
H12   2    0.053384    0.276109    0.972329    11.00000    0.03018 
C13   1    0.035733    0.519398    0.898582    11.00000    0.01598    0.04303 = 
         0.02502   -0.00957    0.00465   -0.00097 
H13   2   -0.007697    0.522129    0.892844    11.00000    0.03552 
C14   1    0.062417    0.659031    0.861623    11.00000    0.02330    0.03212 = 
         0.02251   -0.00340    0.00200    0.00748 
H14   2    0.037476    0.761739    0.830258    11.00000    0.03291 
C15   1    0.124554    0.655076    0.868532    11.00000    0.02313    0.02238 = 
         0.01766   -0.00118    0.00453    0.00130 
H15   2    0.143506    0.753828    0.842767    11.00000    0.02435 
C16   1    0.157173    0.510795    0.691254    11.00000    0.02097    0.02163 = 
         0.01267   -0.00046    0.00111   -0.00260 
H16A  2    0.139196    0.632206    0.675100    11.00000    0.03064 
H16B  2    0.133229    0.445273    0.727174    11.00000    0.02229 
H16C  2    0.154254    0.448346    0.631756    11.00000    0.02829 
HKLF 4 1 1 0 0 0 1 0 0 0 1 
  
REM  KC1Fmi in C2/c  FINAL ALL DATA MERGE-I 2JAN2013 
REM R1 =  0.0342 for    2213 Fo > 4sig(Fo)  and  0.0346 for all    2248 data 
REM    215 parameters refined using      0 restraints 
  
END 
  
WGHT      0.0502      1.5507 
  
REM Instructions for potential hydrogen bonds 
HTAB N1 O8_$1 
  
REM Highest difference peak  0.266,  deepest hole -0.207,  1-sigma level  0.037 
Q1    1   0.1920  0.5133  0.9158  11.00000  0.05    0.27 
Q2    1   0.2856  0.5203  0.8614  11.00000  0.05    0.23 
Q3    1   0.2303  0.5783  0.7983  11.00000  0.05    0.22 
Q4    1   0.2339  0.4853  0.7957  11.00000  0.05    0.21 
Q5    1   0.2388  0.4828  0.8797  11.00000  0.05    0.21 
Q6    1   0.1908  0.5184  0.7235  11.00000  0.05    0.19 
Q7    1   0.3395  0.5977  0.8945  11.00000  0.05    0.18 
Q8    1   0.3443  0.5086  0.8914  11.00000  0.05    0.17 
Q9    1   0.1480  0.4577  0.9344  11.00000  0.05    0.17 
Q10   1   0.3212  0.5755  0.8112  11.00000  0.05    0.17 
Q11   1   0.4076  0.5208  0.7796  11.00000  0.05    0.16 
Q12   1   0.1437  0.5693  0.8750  11.00000  0.05    0.16 
; 
_shelx_res_checksum   55405 
  
_shelx_hkl_file 
; 
   4  -2 -17   25.29    0.75 
   6  -2 -17    3.85    0.13 
   8  -2 -17    3.33    0.12 
   1  -1 -17    0.01    0.02 
   3  -1 -17    4.06    0.10 
   5  -1 -17    4.51    0.11 
   7  -1 -17    0.66    0.05 
   9  -1 -17    0.66    0.05 
  11  -1 -17    0.18    0.03 
  13  -1 -17    0.86    0.06 
   0   0 -17    0.01    0.02 
   2   0 -17    0.02    0.01 
   4   0 -17    0.01    0.01 
   6   0 -17    0.01    0.01 
   8   0 -17    0.02    0.02 
  10   0 -17    0.01    0.01 
  12   0 -17   -0.01    0.02 
  14   0 -17    0.00    0.02 
   1   1 -17    0.02    0.02 
   3   1 -17    3.99    0.10 
   5   1 -17    4.70    0.11 
   7   1 -17    0.71    0.03 
   9   1 -17    0.69    0.03 
  11   1 -17    0.16    0.02 
  13   1 -17    0.85    0.05 
   4   2 -17   25.12    0.71 
   6   2 -17    3.94    0.13 
   8   2 -17    3.42    0.09 
  10   2 -17    0.00    0.01 
  12   2 -17    0.05    0.01 
   1  -3 -16    7.06    0.23 
   3  -3 -16    0.10    0.03 
   5  -3 -16   21.68    0.66 
   7  -3 -16    1.17    0.06 
  -2  -2 -16   14.69    0.31 
   0  -2 -16    9.55    0.21 
   2  -2 -16    7.71    0.17 
   4  -2 -16   17.40    0.52 
   6  -2 -16   24.31    0.71 
   8  -2 -16   35.30    1.08 
  10  -2 -16    4.41    0.17 
  -3  -1 -16    0.54    0.03 
  -1  -1 -16    0.05    0.02 
   1  -1 -16    1.44    0.05 
   3  -1 -16    2.21    0.07 
   5  -1 -16   11.97    0.26 
   7  -1 -16    6.59    0.16 
   9  -1 -16    2.51    0.11 
  11  -1 -16    1.22    0.08 
  13  -1 -16   21.13    0.67 
  -4   0 -16   18.41    0.52 
  -2   0 -16   14.86    0.31 
   0   0 -16   47.80    0.96 
   2   0 -16    3.47    0.09 
   4   0 -16    0.75    0.04 
   6   0 -16   71.79    1.42 
   8   0 -16   62.07    1.30 
  10   0 -16    2.37    0.07 
  12   0 -16    5.92    0.21 
  14   0 -16    5.18    0.19 
  16   0 -16   73.94    2.21 
  -3   1 -16    0.54    0.04 
  -1   1 -16    0.06    0.02 
   1   1 -16    1.36    0.05 
   3   1 -16    2.06    0.07 
   5   1 -16   12.22    0.26 
   7   1 -16    6.76    0.16 
   9   1 -16    2.53    0.08 
  11   1 -16    1.23    0.05 
  13   1 -16   21.97    0.46 
  15   1 -16    3.19    0.13 
  17   1 -16    1.81    0.08 
  -2   2 -16   14.67    0.42 
   0   2 -16    9.39    0.28 
   2   2 -16    7.94    0.24 
   4   2 -16   16.97    0.36 
   6   2 -16   23.74    0.49 
   8   2 -16   36.57    0.74 
  10   2 -16    4.82    0.12 
  12   2 -16   11.60    0.25 
  14   2 -16   13.51    0.29 
  16   2 -16    8.46    0.19 
   1   3 -16    7.03    0.22 
   3   3 -16    0.06    0.02 
   5   3 -16   22.06    0.63 
   7   3 -16    1.26    0.06 
   9   3 -16    2.27    0.07 
  11   3 -16    0.02    0.01 
  13   3 -16    7.01    0.16 
   0  -4 -15    0.10    0.02 
   2  -4 -15   19.59    0.58 
  -3  -3 -15    7.95    0.17 
  -1  -3 -15    7.08    0.16 
   1  -3 -15    0.10    0.03 
   3  -3 -15    6.85    0.23 
   5  -3 -15   54.91    1.63 
   7  -3 -15    0.22    0.04 
  -6  -2 -15    8.06    0.17 
  -4  -2 -15    0.22    0.02 
  -2  -2 -15    1.28    0.05 
   0  -2 -15    9.02    0.20 
   2  -2 -15    1.23    0.05 
   4  -2 -15    0.79    0.06 
   6  -2 -15    0.49    0.06 
   8  -2 -15    4.62    0.18 
  10  -2 -15    3.20    0.14 
  -7  -1 -15    1.40    0.06 
  -5  -1 -15    0.26    0.02 
  -3  -1 -15    7.71    0.18 
  -1  -1 -15    1.49    0.06 
   1  -1 -15    7.77    0.18 
   3  -1 -15    6.37    0.15 
   5  -1 -15   20.12    0.43 
   7  -1 -15    1.25    0.06 
   9  -1 -15    0.43    0.05 
  11  -1 -15    2.16    0.11 
  13  -1 -15    8.08    0.28 
  15  -1 -15    0.74    0.06 
  -6   0 -15    0.01    0.02 
  -4   0 -15    0.03    0.02 
  -2   0 -15    0.00    0.02 
   0   0 -15    0.01    0.02 
   2   0 -15    0.12    0.03 
   4   0 -15    0.06    0.02 
   6   0 -15    0.00    0.02 
   8   0 -15    0.02    0.02 
  10   0 -15    0.03    0.02 
  12   0 -15    0.08    0.04 
  14   0 -15    0.04    0.03 
  16   0 -15    0.00    0.03 
  18   0 -15    0.05    0.03 
  -5   1 -15    0.28    0.03 
  -3   1 -15    7.70    0.24 
  -1   1 -15    1.42    0.08 
   1   1 -15    7.51    0.18 
   3   1 -15    6.25    0.16 
   5   1 -15   20.58    0.43 
   7   1 -15    1.26    0.06 
   9   1 -15    0.39    0.04 
  11   1 -15    2.24    0.08 
  13   1 -15    8.13    0.20 
  15   1 -15    0.82    0.04 
  17   1 -15    5.35    0.19 
  19   1 -15    0.49    0.05 
  -4   2 -15    0.22    0.03 
  -2   2 -15    1.12    0.06 
   0   2 -15    8.75    0.28 
   2   2 -15    1.28    0.07 
   4   2 -15    0.73    0.04 
   6   2 -15    0.47    0.04 
   8   2 -15    4.74    0.13 
  10   2 -15    3.51    0.10 
  12   2 -15    0.30    0.03 
  14   2 -15    9.96    0.22 
  16   2 -15    0.07    0.02 
  18   2 -15    1.02    0.04 
  -3   3 -15    7.81    0.27 
  -1   3 -15    6.74    0.25 
   1   3 -15    0.10    0.02 
   3   3 -15    6.79    0.22 
   5   3 -15   56.21    1.55 
   7   3 -15    0.21    0.03 
   9   3 -15    0.27    0.03 
  11   3 -15   18.91    0.40 
  13   3 -15   21.37    0.45 
  15   3 -15    2.11    0.07 
  17   3 -15    4.99    0.12 
   0   4 -15    0.10    0.03 
   2   4 -15   19.02    0.62 
   4   4 -15    1.20    0.04 
   6   4 -15   18.37    0.41 
   8   4 -15    6.39    0.21 
  10   4 -15    5.46    0.18 
  12   4 -15    1.19    0.04 
  14   4 -15   17.71    0.50 
  -4  -4 -14    4.82    0.16 
  -2  -4 -14    3.92    0.14 
   0  -4 -14    5.47    0.19 
   2  -4 -14  102.76    2.99 
  -7  -3 -14    9.21    0.20 
  -5  -3 -14    7.37    0.17 
  -3  -3 -14    2.76    0.08 
  -1  -3 -14   16.09    0.34 
   1  -3 -14  121.09    3.44 
   3  -3 -14    1.51    0.08 
   5  -3 -14    0.58    0.06 
   7  -3 -14    2.07    0.10 
  -8  -2 -14   45.27    0.90 
  -6  -2 -14   22.40    0.45 
  -4  -2 -14    5.12    0.12 
  -2  -2 -14    8.79    0.20 
   0  -2 -14    4.80    0.12 
   2  -2 -14   79.28    1.60 
   4  -2 -14   13.26    0.42 
   6  -2 -14    0.19    0.04 
   8  -2 -14    0.13    0.04 
  10  -2 -14    7.05    0.26 
  -9  -1 -14    1.62    0.07 
  -7  -1 -14    7.97    0.18 
  -5  -1 -14    9.04    0.21 
  -3  -1 -14    3.39    0.10 
  -1  -1 -14   17.42    0.34 
   1  -1 -14   31.76    0.58 
   3  -1 -14   44.76    0.92 
   5  -1 -14   17.90    0.40 
   7  -1 -14   25.18    0.59 
   9  -1 -14   13.14    0.42 
  11  -1 -14  108.29    3.22 
  13  -1 -14   60.20    1.90 
  -8   0 -14   43.99    1.22 
  -6   0 -14   27.33    0.78 
  -4   0 -14    0.02    0.02 
  -2   0 -14   58.88    1.01 
   0   0 -14   16.80    0.31 
   2   0 -14   11.12    0.22 
   4   0 -14   35.08    0.73 
   6   0 -14    7.04    0.18 
   8   0 -14    6.21    0.16 
  10   0 -14   14.25    0.32 
  12   0 -14    3.01    0.14 
  14   0 -14   20.34    0.65 
  16   0 -14   52.74    1.61 
  18   0 -14   52.18    1.51 
  -7   1 -14    7.91    0.24 
  -5   1 -14    8.73    0.28 
  -3   1 -14    3.38    0.13 
  -1   1 -14   17.80    0.32 
   1   1 -14   32.31    0.56 
   3   1 -14   44.38    0.78 
   5   1 -14   18.26    0.40 
   7   1 -14   25.90    0.54 
   9   1 -14   12.72    0.29 
  11   1 -14  113.59    2.22 
  13   1 -14   65.50    1.31 
  15   1 -14    5.52    0.15 
  17   1 -14   31.32    0.94 
  19   1 -14   31.51    0.95 
  21   1 -14   41.51    1.22 
  -8   2 -14   42.97    1.39 
  -6   2 -14   20.85    0.71 
  -4   2 -14    4.89    0.13 
  -2   2 -14    8.52    0.21 
   0   2 -14    4.63    0.13 
   2   2 -14   78.75    1.68 
   4   2 -14   12.85    0.25 
   6   2 -14    0.16    0.02 
   8   2 -14    0.15    0.02 
  10   2 -14    7.45    0.16 
  12   2 -14   21.51    0.46 
  14   2 -14    6.50    0.16 
  16   2 -14    6.73    0.17 
  18   2 -14    1.94    0.06 
  20   2 -14    5.50    0.19 
  -7   3 -14    8.91    0.31 
  -5   3 -14    7.36    0.26 
  -3   3 -14    2.79    0.13 
  -1   3 -14   15.95    0.35 
   1   3 -14  115.70    2.44 
   3   3 -14    1.51    0.06 
   5   3 -14    0.61    0.06 
   7   3 -14    2.24    0.07 
   9   3 -14   14.13    0.31 
  11   3 -14   54.66    1.11 
  13   3 -14    2.23    0.08 
  15   3 -14    1.78    0.06 
  17   3 -14    8.10    0.19 
  19   3 -14    0.90    0.04 
  -4   4 -14    4.78    0.17 
  -2   4 -14    3.90    0.15 
   0   4 -14    5.52    0.21 
   2   4 -14  102.64    3.20 
   4   4 -14    0.91    0.05 
   6   4 -14    0.92    0.05 
   8   4 -14    0.02    0.01 
  10   4 -14    0.02    0.01 
  12   4 -14   38.54    0.71 
  14   4 -14    3.20    0.09 
  16   4 -14    0.29    0.02 
   1   5 -14   26.47    0.85 
   3   5 -14    1.84    0.09 
   5   5 -14    3.04    0.13 
   7   5 -14    1.25    0.07 
   9   5 -14    9.99    0.19 
  11   5 -14    4.53    0.09 
  13   5 -14    0.39    0.03 
   2  -6 -13   13.40    0.42 
   4  -6 -13    8.24    0.27 
   6  -6 -13    0.05    0.02 
   8  -6 -13    0.11    0.02 
  -5  -5 -13    7.81    0.25 
  -3  -5 -13    2.40    0.07 
  -1  -5 -13   10.25    0.34 
   1  -5 -13   33.58    1.06 
   3  -5 -13   15.59    0.50 
   5  -5 -13    0.07    0.03 
  -8  -4 -13    0.98    0.04 
  -6  -4 -13    0.06    0.01 
  -4  -4 -13    7.47    0.17 
  -2  -4 -13   15.05    0.34 
   0  -4 -13   30.37    0.93 
   2  -4 -13    0.78    0.06 
  10  -4 -13    0.15    0.04 
  12  -4 -13    1.80    0.11 
  -9  -3 -13    0.18    0.02 
  -7  -3 -13    0.32    0.03 
  -5  -3 -13   16.58    0.35 
  -3  -3 -13    0.21    0.03 
  -1  -3 -13   31.47    0.66 
   1  -3 -13   22.66    0.69 
   3  -3 -13    5.85    0.21 
   5  -3 -13    0.00    0.03 
 -10  -2 -13    1.84    0.06 
  -8  -2 -13    5.26    0.13 
  -6  -2 -13    0.08    0.02 
  -4  -2 -13    5.88    0.14 
  -2  -2 -13    1.72    0.06 
   0  -2 -13   12.09    0.27 
   2  -2 -13    1.60    0.06 
   4  -2 -13    1.00    0.07 
   6  -2 -13   12.71    0.41 
   8  -2 -13    3.15    0.14 
  10  -2 -13    0.66    0.07 
 -11  -1 -13    2.09    0.08 
  -9  -1 -13    0.15    0.02 
  -7  -1 -13    0.30    0.03 
  -5  -1 -13    5.74    0.12 
  -3  -1 -13    0.95    0.04 
  -1  -1 -13   19.43    0.36 
   1  -1 -13    0.95    0.05 
   3  -1 -13    0.10    0.02 
   5  -1 -13    1.23    0.06 
   7  -1 -13    1.32    0.09 
   9  -1 -13    1.19    0.08 
  11  -1 -13    3.75    0.17 
  13  -1 -13    0.49    0.06 
 -10   0 -13    0.00    0.02 
  -8   0 -13    0.00    0.02 
  -6   0 -13    0.05    0.02 
  -4   0 -13    0.04    0.02 
  -2   0 -13    0.07    0.02 
   0   0 -13    0.04    0.02 
   2   0 -13   -0.01    0.02 
   4   0 -13    0.00    0.02 
   6   0 -13    0.01    0.02 
   8   0 -13    0.03    0.02 
  10   0 -13    0.02    0.03 
  12   0 -13    0.11    0.04 
  14   0 -13    0.01    0.03 
  16   0 -13    0.00    0.03 
  18   0 -13    0.04    0.03 
 -11   1 -13    1.99    0.09 
  -9   1 -13    0.11    0.03 
  -7   1 -13    0.27    0.03 
  -5   1 -13    5.82    0.15 
  -3   1 -13    0.77    0.05 
  -1   1 -13   19.90    0.36 
   1   1 -13    0.99    0.04 
   3   1 -13    0.09    0.02 
   5   1 -13    1.25    0.05 
   7   1 -13    1.13    0.05 
   9   1 -13    1.07    0.05 
  11   1 -13    4.04    0.12 
  13   1 -13    0.46    0.04 
  15   1 -13    2.49    0.09 
  17   1 -13    0.85    0.08 
  19   1 -13    0.96    0.07 
  21   1 -13    0.99    0.06 
 -10   2 -13    1.83    0.09 
  -8   2 -13    5.27    0.20 
  -6   2 -13    0.05    0.03 
  -4   2 -13    5.69    0.13 
  -2   2 -13    1.73    0.06 
   0   2 -13   11.73    0.23 
   2   2 -13    1.60    0.07 
   4   2 -13    1.02    0.04 
   6   2 -13   12.30    0.24 
   8   2 -13    3.23    0.09 
  10   2 -13    0.51    0.04 
  12   2 -13    0.06    0.02 
  14   2 -13    4.61    0.13 
  16   2 -13    1.84    0.07 
  18   2 -13    3.97    0.11 
  20   2 -13    0.75    0.06 
  22   2 -13    2.43    0.10 
  -9   3 -13    0.19    0.03 
  -7   3 -13    0.34    0.04 
  -5   3 -13   16.97    0.56 
  -3   3 -13    0.27    0.05 
  -1   3 -13   31.93    0.57 
   1   3 -13   22.12    0.41 
   3   3 -13    5.61    0.13 
   5   3 -13   -0.01    0.01 
   7   3 -13    1.69    0.05 
   9   3 -13    2.43    0.06 
  11   3 -13   25.24    0.40 
  13   3 -13    6.71    0.13 
  15   3 -13    4.98    0.11 
  17   3 -13    1.08    0.05 
  19   3 -13    1.10    0.05 
  21   3 -13    0.01    0.02 
  -6   4 -13    0.00    0.02 
  -4   4 -13    7.46    0.27 
  -2   4 -13   15.51    0.52 
   0   4 -13   31.86    1.00 
   2   4 -13    0.65    0.07 
   4   4 -13    0.03    0.02 
   6   4 -13   18.82    0.43 
   8   4 -13    2.72    0.09 
  10   4 -13    0.16    0.02 
  12   4 -13    1.82    0.05 
  14   4 -13    3.79    0.09 
  16   4 -13    4.82    0.10 
  18   4 -13    0.28    0.02 
  -5   5 -13    8.13    0.28 
  -3   5 -13    2.50    0.11 
  -1   5 -13   10.78    0.36 
   1   5 -13   35.75    1.11 
   3   5 -13   15.55    0.37 
   5   5 -13    0.05    0.02 
   7   5 -13    0.25    0.02 
   9   5 -13    2.47    0.08 
  11   5 -13   29.35    0.62 
  13   5 -13   10.47    0.24 
  15   5 -13   11.79    0.26 
   2   6 -13   13.57    0.44 
   4   6 -13    8.26    0.20 
   6   6 -13    0.03    0.01 
   8   6 -13    0.10    0.02 
  -2  -6 -12   42.19    1.23 
   0  -6 -12    0.84    0.05 
   2  -6 -12    8.37    0.28 
   4  -6 -12    9.81    0.33 
   6  -6 -12    1.96    0.09 
   8  -6 -12    6.72    0.24 
  10  -6 -12    2.57    0.08 
  12  -6 -12    2.48    0.08 
  -7  -5 -12    0.22    0.02 
  -5  -5 -12    4.74    0.12 
  -3  -5 -12    0.45    0.03 
  -1  -5 -12    1.49    0.08 
   1  -5 -12   63.17    1.98 
   3  -5 -12   28.08    0.92 
   5  -5 -12    1.43    0.09 
   7  -5 -12   16.22    0.53 
   9  -5 -12    0.57    0.04 
  11  -5 -12   35.83    0.79 
  13  -5 -12   15.54    0.52 
  15  -5 -12    1.23    0.08 
 -10  -4 -12   10.09    0.18 
  -8  -4 -12    6.21    0.12 
  -6  -4 -12    2.84    0.07 
  -4  -4 -12   23.50    0.41 
  -2  -4 -12    1.28    0.06 
   0  -4 -12   72.62    1.51 
   2  -4 -12   86.22    1.82 
   8  -4 -12   22.54    0.81 
  10  -4 -12   12.39    0.45 
  12  -4 -12    0.76    0.07 
  14  -4 -12    5.06    0.20 
  16  -4 -12    0.23    0.04 
 -11  -3 -12    0.78    0.03 
  -9  -3 -12    0.15    0.02 
  -7  -3 -12    0.05    0.02 
  -5  -3 -12    0.57    0.03 
  -3  -3 -12   23.26    0.50 
  -1  -3 -12    0.99    0.05 
   1  -3 -12   96.86    2.78 
   3  -3 -12  118.15    3.50 
   5  -3 -12    0.78    0.07 
   7  -3 -12   13.13    0.48 
   9  -3 -12    9.44    0.35 
  11  -3 -12   67.37    2.18 
  13  -3 -12   74.44    2.31 
  15  -3 -12    0.09    0.04 
 -12  -2 -12    6.55    0.15 
 -10  -2 -12    1.29    0.05 
  -8  -2 -12    5.50    0.14 
  -6  -2 -12    0.18    0.02 
  -4  -2 -12    0.03    0.02 
  -2  -2 -12    7.44    0.15 
   0  -2 -12  143.48    2.86 
   2  -2 -12   69.10    1.41 
   4  -2 -12   10.81    0.36 
   6  -2 -12   44.30    1.31 
   8  -2 -12    4.49    0.13 
  10  -2 -12   28.11    0.93 
  12  -2 -12    0.76    0.08 
 -13  -1 -12    0.05    0.02 
 -11  -1 -12   14.72    0.44 
  -9  -1 -12    0.34    0.03 
  -7  -1 -12    0.19    0.02 
  -5  -1 -12   63.47    1.09 
  -3  -1 -12   40.44    0.71 
  -1  -1 -12  254.71    4.34 
   1  -1 -12   27.99    0.51 
   3  -1 -12   17.25    0.32 
   5  -1 -12   41.97    1.27 
   7  -1 -12   31.31    0.93 
   9  -1 -12   15.25    0.50 
  11  -1 -12   45.32    1.37 
  13  -1 -12   32.84    1.06 
 -12   0 -12   72.76    1.50 
 -10   0 -12    2.89    0.09 
  -8   0 -12    1.82    0.07 
  -6   0 -12    0.36    0.05 
  -4   0 -12    6.38    0.14 
  -2   0 -12   69.87    1.20 
   0   0 -12   80.66    1.38 
   2   0 -12   19.94    0.37 
   4   0 -12  141.81    3.06 
   6   0 -12   38.81    0.86 
   8   0 -12    1.92    0.11 
  10   0 -12   31.37    0.67 
  12   0 -12    4.39    0.19 
  14   0 -12   20.02    0.64 
  16   0 -12   23.16    0.74 
 -13   1 -12    0.07    0.03 
 -11   1 -12   14.84    0.49 
  -9   1 -12    0.31    0.05 
  -7   1 -12    0.20    0.02 
  -5   1 -12   63.63    1.12 
  -3   1 -12   40.83    0.88 
  -1   1 -12  259.27    4.34 
   1   1 -12   28.86    0.51 
   3   1 -12   16.94    0.32 
   5   1 -12   42.38    0.75 
   7   1 -12   30.34    0.55 
   9   1 -12   15.45    0.29 
  11   1 -12   46.21    0.80 
  13   1 -12   35.11    0.74 
  15   1 -12  131.75    2.71 
  17   1 -12    0.05    0.04 
  19   1 -12   63.57    1.90 
  21   1 -12    0.09    0.03 
 -12   2 -12    6.48    0.23 
 -10   2 -12    1.26    0.08 
  -8   2 -12    5.69    0.22 
  -6   2 -12    0.09    0.03 
  -4   2 -12    0.04    0.02 
  -2   2 -12    7.44    0.16 
   0   2 -12  141.02    2.48 
   2   2 -12   68.11    1.27 
   4   2 -12   10.45    0.21 
   6   2 -12   43.17    0.68 
   8   2 -12    4.61    0.10 
  10   2 -12   27.88    0.44 
  12   2 -12    0.73    0.03 
  14   2 -12    0.56    0.03 
  16   2 -12   20.81    0.40 
  18   2 -12    3.05    0.10 
  20   2 -12    2.58    0.12 
  22   2 -12    0.03    0.02 
 -11   3 -12    0.82    0.06 
  -9   3 -12    0.22    0.04 
  -7   3 -12    0.05    0.04 
  -5   3 -12    0.59    0.07 
  -3   3 -12   23.52    0.56 
  -1   3 -12    0.96    0.06 
   1   3 -12   94.69    1.47 
   3   3 -12  118.94    1.84 
   5   3 -12    0.84    0.04 
   7   3 -12   13.76    0.23 
   9   3 -12    9.24    0.17 
  11   3 -12   68.52    0.98 
  13   3 -12   72.73    1.11 
  15   3 -12    0.14    0.02 
  17   3 -12    0.07    0.02 
  19   3 -12    0.08    0.02 
  21   3 -12    9.91    0.22 
  -8   4 -12    6.62    0.23 
  -6   4 -12    3.02    0.14 
  -4   4 -12   24.89    0.79 
  -2   4 -12    1.32    0.09 
   0   4 -12   72.36    1.33 
   2   4 -12   88.18    1.61 
   4   4 -12    4.49    0.10 
   6   4 -12   16.14    0.31 
   8   4 -12   24.61    0.46 
  10   4 -12   12.91    0.22 
  12   4 -12    0.70    0.03 
  14   4 -12    4.99    0.11 
  16   4 -12    0.20    0.03 
  18   4 -12   15.93    0.29 
  20   4 -12    0.06    0.01 
  -7   5 -12    0.20    0.03 
  -5   5 -12    4.89    0.19 
  -3   5 -12    0.48    0.06 
  -1   5 -12    1.47    0.06 
   1   5 -12   67.05    1.49 
   3   5 -12   30.01    0.69 
   5   5 -12    1.50    0.08 
   7   5 -12   16.85    0.37 
   9   5 -12    0.57    0.04 
  11   5 -12   35.79    0.76 
  13   5 -12   15.51    0.34 
  15   5 -12    1.22    0.04 
  17   5 -12    1.69    0.04 
  -2   6 -12   41.35    1.28 
   0   6 -12    0.87    0.04 
   2   6 -12    8.44    0.21 
   4   6 -12    9.88    0.24 
   6   6 -12    1.95    0.07 
   8   6 -12    7.09    0.25 
  10   6 -12    2.87    0.11 
  12   6 -12    2.58    0.07 
  14   6 -12    3.13    0.12 
  -1  -7 -11   27.77    0.84 
   1  -7 -11   27.64    0.81 
   3  -7 -11    3.38    0.12 
   5  -7 -11    3.28    0.12 
   7  -7 -11   26.71    0.78 
   9  -7 -11    7.43    0.24 
  -6  -6 -11   18.37    0.55 
  -4  -6 -11   13.78    0.42 
  -2  -6 -11    1.29    0.07 
   0  -6 -11   20.17    0.63 
   2  -6 -11   14.87    0.48 
   4  -6 -11    1.18    0.08 
   6  -6 -11   14.12    0.46 
   8  -6 -11    0.07    0.02 
  10  -6 -11    2.91    0.09 
  12  -6 -11    0.54    0.04 
  14  -6 -11    7.66    0.18 
  16  -6 -11   64.66    1.42 
  -9  -5 -11   10.84    0.24 
  -7  -5 -11   20.92    0.45 
  -5  -5 -11    2.96    0.09 
  -3  -5 -11   42.86    0.90 
  -1  -5 -11   26.63    0.86 
   1  -5 -11    0.80    0.07 
   3  -5 -11    9.63    0.34 
   5  -5 -11    0.00    0.03 
   7  -5 -11   13.07    0.33 
   9  -5 -11   12.76    0.32 
  11  -5 -11   31.73    0.71 
  13  -5 -11  106.88    2.29 
  15  -5 -11    9.72    0.24 
  17  -5 -11    1.34    0.08 
 -12  -4 -11    0.19    0.02 
 -10  -4 -11    4.01    0.08 
  -8  -4 -11    3.98    0.09 
  -6  -4 -11   14.35    0.26 
  -4  -4 -11   65.60    1.09 
  -2  -4 -11    0.39    0.04 
   0  -4 -11   32.62    0.71 
   2  -4 -11   20.09    0.65 
   4  -4 -11    0.26    0.05 
   6  -4 -11    1.74    0.06 
   8  -4 -11    0.42    0.06 
  10  -4 -11    0.57    0.07 
  12  -4 -11    8.62    0.32 
  14  -4 -11    6.05    0.24 
  16  -4 -11  104.14    3.20 
  18  -4 -11    5.64    0.22 
 -13  -3 -11    1.10    0.03 
 -11  -3 -11    6.07    0.12 
  -9  -3 -11    2.34    0.06 
  -7  -3 -11   19.12    0.31 
  -5  -3 -11   19.73    0.31 
  -3  -3 -11  107.28    1.78 
  -1  -3 -11   37.36    0.77 
   1  -3 -11   25.28    0.76 
   3  -3 -11   18.74    0.59 
   7  -3 -11    4.13    0.18 
   9  -3 -11   20.83    0.71 
  13  -3 -11  108.77    3.35 
  15  -3 -11   75.99    2.39 
  17  -3 -11   29.69    0.99 
 -14  -2 -11    2.36    0.07 
 -12  -2 -11    0.48    0.03 
 -10  -2 -11    3.47    0.08 
  -8  -2 -11    3.74    0.08 
  -6  -2 -11    4.77    0.11 
  -4  -2 -11   68.48    1.19 
  -2  -2 -11   10.75    0.21 
   0  -2 -11    9.35    0.32 
  12  -2 -11   11.91    0.42 
  14  -2 -11   23.72    0.78 
  16  -2 -11   25.17    0.84 
 -15  -1 -11    0.68    0.04 
 -13  -1 -11    0.05    0.02 
 -11  -1 -11    1.87    0.09 
  -9  -1 -11    0.23    0.03 
  -7  -1 -11    2.56    0.07 
  -5  -1 -11    7.48    0.16 
  -3  -1 -11   17.17    0.31 
  -1  -1 -11   11.37    0.43 
   1  -1 -11    4.04    0.19 
   3  -1 -11    0.64    0.06 
 -14   0 -11   -0.01    0.02 
 -12   0 -11    0.02    0.02 
 -10   0 -11    0.01    0.02 
  -8   0 -11   -0.01    0.02 
  -6   0 -11    0.02    0.02 
  -4   0 -11    0.02    0.02 
  -2   0 -11    0.05    0.04 
   0   0 -11    0.06    0.03 
   2   0 -11   -0.01    0.03 
   4   0 -11    0.03    0.03 
   6   0 -11    0.01    0.03 
  14   0 -11    0.10    0.04 
  16   0 -11    0.00    0.04 
 -15   1 -11    0.71    0.05 
 -13   1 -11    0.12    0.03 
 -11   1 -11    2.00    0.11 
  -9   1 -11    0.17    0.03 
  -7   1 -11    2.64    0.07 
  -5   1 -11    7.51    0.16 
  -3   1 -11   16.58    0.33 
  -1   1 -11   11.96    0.43 
   1   1 -11    5.17    0.21 
   5   1 -11    2.55    0.13 
   7   1 -11    0.59    0.07 
   9   1 -11    1.69    0.11 
  11   1 -11    0.12    0.03 
  13   1 -11   12.62    0.23 
  15   1 -11   38.47    0.92 
  17   1 -11   11.63    0.40 
  19   1 -11    5.97    0.23 
  21   1 -11    7.84    0.29 
 -14   2 -11    2.45    0.11 
 -12   2 -11    0.48    0.06 
 -10   2 -11    3.61    0.16 
  -8   2 -11    3.77    0.12 
  -6   2 -11    4.54    0.14 
  -4   2 -11   70.45    1.22 
  -2   2 -11   10.99    0.22 
   0   2 -11   10.03    0.37 
   2   2 -11    0.18    0.05 
   4   2 -11   13.73    0.50 
   6   2 -11    0.84    0.08 
   8   2 -11    0.47    0.05 
  10   2 -11    0.08    0.02 
  12   2 -11   11.64    0.19 
  14   2 -11   23.41    0.41 
  16   2 -11   24.96    0.51 
  18   2 -11    3.78    0.16 
  20   2 -11   14.90    0.48 
  22   2 -11    0.08    0.03 
 -13   3 -11    1.01    0.07 
 -11   3 -11    6.46    0.24 
  -9   3 -11    2.57    0.13 
  -7   3 -11   20.42    0.65 
  -5   3 -11   20.12    0.48 
  -3   3 -11  107.63    2.40 
  -1   3 -11   37.89    0.71 
   1   3 -11   25.51    0.40 
   3   3 -11   19.13    0.36 
   5   3 -11    2.82    0.09 
   7   3 -11    3.65    0.08 
   9   3 -11   21.31    0.32 
  11   3 -11    0.02    0.02 
  13   3 -11  105.65    1.75 
  15   3 -11   74.56    1.37 
  17   3 -11   30.63    0.61 
  19   3 -11    0.32    0.03 
  21   3 -11    6.21    0.11 
  23   3 -11    5.53    0.19 
 -12   4 -11    0.20    0.03 
 -10   4 -11    4.19    0.17 
  -8   4 -11    4.37    0.18 
  -6   4 -11   15.04    0.50 
  -4   4 -11   68.27    2.06 
  -2   4 -11    0.48    0.04 
   0   4 -11   33.59    0.65 
   2   4 -11   20.51    0.49 
   4   4 -11    0.24    0.03 
   6   4 -11    1.72    0.05 
   8   4 -11    0.42    0.03 
  10   4 -11    0.54    0.03 
  12   4 -11    8.02    0.13 
  14   4 -11    5.98    0.14 
  16   4 -11  100.57    2.21 
  18   4 -11    6.08    0.16 
  20   4 -11    1.28    0.04 
  22   4 -11    0.12    0.03 
  -9   5 -11   11.07    0.37 
  -7   5 -11   20.97    0.68 
  -5   5 -11    2.95    0.13 
  -3   5 -11   43.16    0.97 
  -1   5 -11   28.57    0.64 
   1   5 -11    0.91    0.05 
   3   5 -11   10.20    0.35 
   5   5 -11    0.06    0.02 
   7   5 -11   13.69    0.24 
   9   5 -11   13.05    0.26 
  11   5 -11   31.06    0.69 
  13   5 -11  104.19    1.80 
  15   5 -11    9.57    0.16 
  17   5 -11    1.36    0.04 
  19   5 -11    1.16    0.04 
  -4   6 -11   13.67    0.44 
  -2   6 -11    1.18    0.05 
   0   6 -11   20.28    0.47 
   2   6 -11   15.27    0.36 
   4   6 -11    1.23    0.05 
   6   6 -11   14.50    0.49 
   8   6 -11    0.07    0.03 
  10   6 -11    3.02    0.13 
  12   6 -11    0.51    0.03 
  14   6 -11    7.42    0.18 
  16   6 -11   66.17    2.12 
   1   7 -11   26.40    0.87 
   3   7 -11    3.17    0.12 
   5   7 -11    3.01    0.12 
   7   7 -11   25.34    0.84 
  -3  -7 -10   65.72    1.91 
  -1  -7 -10    4.45    0.16 
   1  -7 -10    1.65    0.08 
   3  -7 -10   10.10    0.32 
   5  -7 -10    8.53    0.28 
   7  -7 -10    3.99    0.15 
   9  -7 -10   15.29    0.35 
  11  -7 -10    0.03    0.02 
  13  -7 -10   41.91    1.26 
  -8  -6 -10   10.17    0.32 
  -6  -6 -10   15.36    0.46 
  -4  -6 -10    6.48    0.22 
  -2  -6 -10   12.40    0.39 
   0  -6 -10    7.49    0.26 
   2  -6 -10    0.01    0.03 
   4  -6 -10    1.96    0.11 
   6  -6 -10   33.20    1.04 
   8  -6 -10    0.03    0.02 
  10  -6 -10    0.61    0.05 
  12  -6 -10    8.62    0.21 
  14  -6 -10    6.81    0.17 
  16  -6 -10    0.76    0.04 
 -11  -5 -10    1.15    0.03 
  -9  -5 -10   72.95    1.20 
  -7  -5 -10    8.86    0.20 
  -5  -5 -10    3.59    0.10 
  -3  -5 -10   47.13    1.00 
  -1  -5 -10    5.32    0.21 
   1  -5 -10   27.08    0.86 
   3  -5 -10   47.13    1.51 
   5  -5 -10    1.31    0.09 
   7  -5 -10    2.17    0.09 
   9  -5 -10   19.18    0.45 
  11  -5 -10   12.48    0.31 
  13  -5 -10   19.69    0.46 
  15  -5 -10    3.63    0.11 
  17  -5 -10   78.15    1.71 
  19  -5 -10    0.14    0.02 
 -14  -4 -10    2.38    0.06 
 -12  -4 -10    3.88    0.08 
 -10  -4 -10   33.13    0.57 
  -8  -4 -10   10.67    0.20 
  -6  -4 -10    0.21    0.03 
  -4  -4 -10   11.26    0.27 
  -2  -4 -10   16.94    0.40 
   0  -4 -10   65.94    1.41 
   6  -4 -10    2.25    0.08 
   8  -4 -10    3.09    0.08 
  10  -4 -10   24.29    0.56 
  12  -4 -10   13.54    0.47 
  14  -4 -10    0.11    0.04 
  16  -4 -10    0.74    0.07 
  18  -4 -10   10.67    0.39 
  20  -4 -10    0.54    0.05 
 -15  -3 -10   14.95    0.26 
 -13  -3 -10    0.24    0.02 
 -11  -3 -10    7.36    0.15 
  -9  -3 -10  167.97    2.51 
  -7  -3 -10   88.70    1.32 
  -5  -3 -10   17.91    0.29 
  -3  -3 -10    2.62    0.08 
  -1  -3 -10    3.63    0.15 
  11  -3 -10   13.16    0.46 
  13  -3 -10   50.39    1.61 
  15  -3 -10   13.29    0.47 
  17  -3 -10    5.25    0.22 
  19  -3 -10   10.07    0.35 
 -16  -2 -10    2.66    0.07 
 -14  -2 -10    0.19    0.02 
 -12  -2 -10    3.77    0.09 
 -10  -2 -10   25.74    0.42 
  -8  -2 -10    1.39    0.05 
  -6  -2 -10   15.62    0.29 
  -4  -2 -10   33.12    0.75 
  -2  -2 -10    0.97    0.08 
   0  -2 -10   23.42    0.79 
  14  -2 -10   18.65    0.63 
  16  -2 -10   74.53    2.34 
  18  -2 -10    0.01    0.03 
 -17  -1 -10   14.94    0.47 
 -15  -1 -10   20.62    0.37 
 -13  -1 -10   39.13    0.69 
 -11  -1 -10   81.74    1.24 
  -9  -1 -10   87.84    1.51 
  -7  -1 -10  230.26    3.94 
  -5  -1 -10    5.54    0.23 
  -3  -1 -10    7.02    0.28 
  -1  -1 -10   24.56    0.82 
   1  -1 -10   60.10    2.02 
   3  -1 -10   25.30    0.88 
 -16   0 -10   24.26    0.78 
 -14   0 -10   44.64    1.41 
 -12   0 -10    2.02    0.06 
 -10   0 -10    3.73    0.09 
  -8   0 -10    0.32    0.03 
  -6   0 -10   30.65    0.68 
  -4   0 -10  242.73    7.78 
  -2   0 -10   38.68    1.28 
   0   0 -10   16.76    0.58 
   2   0 -10   38.77    1.24 
   4   0 -10    0.07    0.03 
   6   0 -10   22.43    0.78 
   8   0 -10    4.45    0.19 
  12   0 -10  118.63    4.65 
 -17   1 -10   15.54    0.49 
 -15   1 -10   22.04    0.68 
 -13   1 -10   42.12    1.27 
 -11   1 -10   83.54    1.86 
  -9   1 -10   88.44    1.99 
  -7   1 -10  232.52    4.03 
  -5   1 -10    5.55    0.23 
  -3   1 -10    7.49    0.29 
  -1   1 -10   25.15    0.82 
   1   1 -10   63.73    2.03 
   3   1 -10   27.32    0.89 
   5   1 -10   90.66    2.94 
   7   1 -10   46.44    1.16 
   9   1 -10   63.29    1.57 
  11   1 -10   28.45    0.75 
  13   1 -10  234.70    9.18 
  15   1 -10    0.37    0.03 
  17   1 -10    2.07    0.07 
  19   1 -10   62.47    1.91 
 -16   2 -10    2.88    0.12 
 -14   2 -10    0.28    0.05 
 -12   2 -10    4.11    0.17 
 -10   2 -10   27.95    0.87 
  -8   2 -10    1.32    0.07 
  -6   2 -10   15.79    0.39 
  -4   2 -10   33.61    0.78 
  -2   2 -10    1.03    0.08 
   0   2 -10   23.93    0.80 
   2   2 -10   13.53    0.49 
   4   2 -10    4.50    0.20 
   6   2 -10    0.91    0.06 
   8   2 -10    3.80    0.13 
  10   2 -10   86.11    2.14 
  12   2 -10    8.72    0.26 
  14   2 -10   18.52    0.33 
  16   2 -10   72.58    1.31 
  18   2 -10    0.04    0.02 
  20   2 -10    8.95    0.23 
  22   2 -10    8.91    0.31 
 -15   3 -10   15.36    0.49 
 -13   3 -10    0.24    0.04 
 -11   3 -10    7.63    0.28 
  -9   3 -10  179.69    5.29 
  -7   3 -10   93.05    2.80 
  -5   3 -10   18.25    0.44 
  -3   3 -10    2.70    0.08 
  -1   3 -10    3.78    0.10 
   1   3 -10  233.49    7.41 
   3   3 -10   19.69    0.67 
   5   3 -10    2.08    0.07 
   7   3 -10    1.83    0.07 
   9   3 -10   29.77    0.64 
  11   3 -10   12.54    0.22 
  13   3 -10   48.99    0.78 
  15   3 -10   13.22    0.26 
  17   3 -10    5.69    0.16 
  19   3 -10    9.98    0.25 
  21   3 -10   26.78    0.60 
  23   3 -10    2.59    0.11 
 -12   4 -10    3.68    0.15 
 -10   4 -10   32.89    1.06 
  -8   4 -10   10.78    0.38 
  -6   4 -10    0.23    0.05 
  -4   4 -10   11.56    0.28 
  -2   4 -10   16.96    0.40 
   0   4 -10   67.13    1.55 
   2   4 -10   38.76    0.77 
   4   4 -10   10.42    0.19 
   6   4 -10    2.32    0.06 
   8   4 -10    3.06    0.07 
  10   4 -10   23.98    0.39 
  12   4 -10   13.09    0.20 
  14   4 -10    0.16    0.02 
  16   4 -10    0.78    0.04 
  18   4 -10   11.51    0.28 
  20   4 -10    0.57    0.04 
  22   4 -10   10.04    0.19 
 -11   5 -10    1.11    0.06 
  -9   5 -10   69.82    2.25 
  -7   5 -10    8.45    0.31 
  -5   5 -10    3.47    0.11 
  -3   5 -10   47.89    1.07 
  -1   5 -10    5.53    0.15 
   1   5 -10   26.56    0.66 
   3   5 -10   48.26    1.17 
   5   5 -10    1.35    0.05 
   7   5 -10    2.32    0.06 
   9   5 -10   19.41    0.29 
  11   5 -10   12.53    0.27 
  13   5 -10   19.09    0.45 
  15   5 -10    3.55    0.11 
  17   5 -10   78.47    1.71 
  19   5 -10    0.09    0.02 
  -6   6 -10   14.17    0.48 
  -4   6 -10    6.29    0.16 
  -2   6 -10   12.06    0.29 
   0   6 -10    7.68    0.19 
   2   6 -10    0.01    0.02 
   4   6 -10    2.00    0.10 
   6   6 -10   32.46    1.12 
   8   6 -10    0.04    0.03 
  10   6 -10    0.67    0.06 
  12   6 -10    8.05    0.20 
  14   6 -10    6.46    0.16 
  16   6 -10    0.71    0.04 
  -3   7 -10   62.88    2.07 
  -1   7 -10    4.46    0.11 
   1   7 -10    1.63    0.05 
   3   7 -10    9.54    0.23 
   5   7 -10    8.12    0.20 
   7   7 -10    3.68    0.14 
   9   7 -10   14.75    0.51 
  11   7 -10    0.03    0.02 
  -7  -7  -9   16.23    0.50 
  -5  -7  -9    1.42    0.07 
  -3  -7  -9    4.53    0.16 
  -1  -7  -9    4.69    0.17 
   1  -7  -9   23.81    0.73 
   3  -7  -9   20.21    0.61 
   5  -7  -9   14.23    0.44 
   7  -7  -9   11.91    0.28 
   9  -7  -9   15.57    0.38 
  11  -7  -9   10.83    0.25 
  13  -7  -9    0.30    0.03 
  15  -7  -9    3.12    0.12 
 -10  -6  -9    0.39    0.04 
  -8  -6  -9    5.08    0.12 
  -6  -6  -9    0.66    0.06 
  -4  -6  -9    4.15    0.16 
  -2  -6  -9    0.19    0.04 
   0  -6  -9    4.35    0.17 
   2  -6  -9   14.58    0.49 
   4  -6  -9    0.57    0.07 
   6  -6  -9    3.04    0.10 
   8  -6  -9    7.73    0.21 
  10  -6  -9   29.31    0.67 
  12  -6  -9    4.23    0.13 
  14  -6  -9    0.02    0.02 
  16  -6  -9    0.27    0.03 
  18  -6  -9    3.67    0.10 
 -13  -5  -9    3.32    0.07 
 -11  -5  -9   22.88    0.39 
  -9  -5  -9   64.21    1.04 
  -7  -5  -9   63.04    1.30 
  -5  -5  -9    0.86    0.05 
  -3  -5  -9    6.57    0.25 
  -1  -5  -9    6.83    0.25 
   1  -5  -9   92.87    2.88 
   3  -5  -9   19.08    0.45 
   5  -5  -9    5.71    0.16 
   7  -5  -9   14.58    0.29 
   9  -5  -9    2.18    0.07 
  11  -5  -9    8.60    0.23 
  13  -5  -9   45.85    1.02 
  15  -5  -9    4.31    0.13 
  17  -5  -9   73.25    1.66 
  19  -5  -9    1.71    0.07 
  21  -5  -9    6.70    0.23 
 -16  -4  -9    0.32    0.03 
 -14  -4  -9   23.61    0.40 
 -12  -4  -9    5.32    0.11 
 -10  -4  -9    0.59    0.03 
  -8  -4  -9    0.32    0.03 
  -6  -4  -9   13.37    0.25 
  -4  -4  -9    1.22    0.06 
  -2  -4  -9   49.06    1.50 
   6  -4  -9   25.54    0.82 
   8  -4  -9    1.32    0.08 
  10  -4  -9   58.48    1.86 
  12  -4  -9    6.88    0.20 
  14  -4  -9   53.71    1.21 
  16  -4  -9    0.31    0.04 
  18  -4  -9   10.43    0.26 
 -17  -3  -9    0.23    0.02 
 -15  -3  -9    0.27    0.02 
 -13  -3  -9   24.91    0.43 
 -11  -3  -9    9.21    0.16 
  -9  -3  -9   11.28    0.22 
  -7  -3  -9   88.93    1.33 
  -5  -3  -9    0.30    0.03 
  13  -3  -9   30.02    1.00 
  15  -3  -9   33.23    1.08 
  17  -3  -9    4.66    0.20 
 -18  -2  -9    1.99    0.08 
 -16  -2  -9    0.33    0.02 
 -14  -2  -9    2.18    0.05 
 -12  -2  -9    3.66    0.08 
 -10  -2  -9    1.06    0.04 
  -8  -2  -9    0.02    0.02 
  -6  -2  -9   14.71    0.51 
  -4  -2  -9   11.41    0.41 
  -2  -2  -9  108.76    3.42 
   0  -2  -9    2.17    0.11 
  16  -2  -9   39.85    1.29 
 -19  -1  -9    0.70    0.04 
 -17  -1  -9    0.35    0.03 
 -15  -1  -9    4.06    0.09 
 -13  -1  -9    9.89    0.17 
 -11  -1  -9    3.34    0.07 
  -9  -1  -9    0.26    0.03 
  -7  -1  -9   17.46    0.60 
  -5  -1  -9    2.59    0.13 
  -3  -1  -9    1.66    0.10 
  -1  -1  -9    8.41    0.30 
   1  -1  -9   17.56    0.61 
   3  -1  -9   40.13    1.36 
 -18   0  -9    0.02    0.03 
 -16   0  -9    0.05    0.02 
 -14   0  -9    0.02    0.02 
 -12   0  -9    0.03    0.02 
 -10   0  -9    0.02    0.02 
  -8   0  -9    0.02    0.03 
  -6   0  -9    0.11    0.04 
  -4   0  -9    0.01    0.03 
  -2   0  -9    0.06    0.03 
   0   0  -9    0.04    0.03 
   4   0  -9    0.01    0.02 
   6   0  -9    0.01    0.02 
   8   0  -9    0.00    0.01 
  10   0  -9    0.05    0.03 
  12   0  -9    0.02    0.02 
  14   0  -9    0.10    0.03 
  16   0  -9    0.42    0.06 
 -17   1  -9    0.38    0.05 
 -15   1  -9    4.35    0.18 
 -13   1  -9   10.55    0.36 
 -11   1  -9    3.37    0.11 
  -9   1  -9    0.28    0.04 
  -7   1  -9   16.88    0.60 
  -5   1  -9    2.73    0.14 
  -3   1  -9    1.54    0.09 
  -1   1  -9    8.24    0.31 
   1   1  -9   18.37    0.62 
   3   1  -9   42.06    1.37 
   5   1  -9   41.54    1.05 
   7   1  -9   22.57    0.58 
   9   1  -9    0.13    0.03 
  11   1  -9    6.92    0.21 
  13   1  -9    1.26    0.10 
  15   1  -9   26.20    1.08 
  17   1  -9    9.96    0.23 
  19   1  -9    0.43    0.03 
 -18   2  -9    2.00    0.09 
 -16   2  -9    0.36    0.05 
 -14   2  -9    2.41    0.12 
 -12   2  -9    3.89    0.18 
 -10   2  -9    1.08    0.09 
  -8   2  -9    0.02    0.03 
  -6   2  -9   14.20    0.50 
  -4   2  -9   11.06    0.41 
  -2   2  -9  105.31    3.43 
   0   2  -9    2.11    0.12 
   2   2  -9   51.31    1.66 
   4   2  -9   10.28    0.28 
   6   2  -9    0.42    0.06 
   8   2  -9    0.25    0.03 
  10   2  -9   37.04    0.76 
  12   2  -9   76.32    1.34 
  14   2  -9   83.04    1.70 
  16   2  -9   39.91    0.71 
  18   2  -9   90.03    1.82 
  20   2  -9    4.17    0.17 
  22   2  -9    0.66    0.04 
 -15   3  -9    0.28    0.04 
 -13   3  -9   24.90    0.82 
 -11   3  -9    9.74    0.34 
  -9   3  -9   11.89    0.41 
  -7   3  -9   92.33    2.81 
  -5   3  -9    0.26    0.03 
  -3   3  -9    0.40    0.06 
  -1   3  -9    9.24    0.36 
   1   3  -9    0.67    0.05 
   3   3  -9   96.70    1.97 
   5   3  -9   48.78    0.99 
   7   3  -9    5.19    0.13 
   9   3  -9    0.05    0.02 
  11   3  -9   16.79    0.37 
  13   3  -9   30.27    0.49 
  15   3  -9   32.71    0.53 
  17   3  -9    4.66    0.10 
  19   3  -9    2.47    0.09 
  21   3  -9    7.30    0.26 
  23   3  -9    3.52    0.10 
 -14   4  -9   21.88    0.75 
 -12   4  -9    5.01    0.21 
 -10   4  -9    0.63    0.07 
  -8   4  -9    0.32    0.05 
  -6   4  -9   13.34    0.33 
  -4   4  -9    1.15    0.06 
  -2   4  -9   52.12    1.16 
   0   4  -9    4.46    0.11 
   2   4  -9    3.68    0.12 
   4   4  -9    7.24    0.18 
   6   4  -9   26.33    0.64 
   8   4  -9    1.25    0.07 
  10   4  -9   61.24    1.38 
  12   4  -9    7.15    0.17 
  14   4  -9   54.05    0.93 
  16   4  -9    0.31    0.03 
  18   4  -9   10.92    0.39 
  20   4  -9    1.80    0.09 
  22   4  -9   14.74    0.33 
 -11   5  -9   22.00    0.73 
  -9   5  -9   59.67    1.94 
  -7   5  -9   60.43    1.40 
  -5   5  -9    0.86    0.05 
  -3   5  -9    6.62    0.18 
  -1   5  -9    6.46    0.15 
   1   5  -9   93.50    2.23 
   3   5  -9   19.78    0.49 
   5   5  -9    5.93    0.18 
   7   5  -9   15.08    0.39 
   9   5  -9    2.33    0.09 
  11   5  -9    8.44    0.24 
  13   5  -9   45.30    0.89 
  15   5  -9    4.26    0.18 
  17   5  -9   74.92    2.49 
  19   5  -9    1.71    0.06 
  21   5  -9    7.07    0.17 
  -6   6  -9    0.69    0.04 
  -4   6  -9    4.17    0.12 
  -2   6  -9    0.21    0.03 
   0   6  -9    4.13    0.12 
   2   6  -9   14.50    0.37 
   4   6  -9    0.55    0.04 
   6   6  -9    2.94    0.15 
  14   6  -9    0.03    0.03 
  16   6  -9    0.30    0.04 
  18   6  -9    3.64    0.10 
  -5   7  -9    1.44    0.07 
  -3   7  -9    4.62    0.17 
  -1   7  -9    4.53    0.12 
   1   7  -9   21.82    0.75 
   3   7  -9   18.38    0.45 
   5   7  -9   13.00    0.46 
   7   7  -9   11.65    0.40 
   9   7  -9   15.17    0.51 
  11   7  -9    9.44    0.36 
   0  -8  -8   17.77    0.55 
   2  -8  -8    0.74    0.05 
   4  -8  -8    6.76    0.22 
   6  -8  -8    1.53    0.07 
   8  -8  -8   10.53    0.33 
  -7  -7  -8    0.91    0.05 
  -5  -7  -8    0.06    0.02 
  -3  -7  -8   12.36    0.39 
  -1  -7  -8    2.39    0.11 
   1  -7  -8    0.11    0.03 
   3  -7  -8    2.58    0.12 
   5  -7  -8    0.08    0.03 
   7  -7  -8    2.82    0.09 
   9  -7  -8    2.61    0.09 
  11  -7  -8   12.75    0.30 
  13  -7  -8   20.56    0.46 
  15  -7  -8    0.16    0.02 
 -12  -6  -8    1.98    0.08 
 -10  -6  -8    0.33    0.04 
  -8  -6  -8    0.67    0.04 
  -6  -6  -8   44.83    1.34 
  -4  -6  -8    3.90    0.16 
  -2  -6  -8    2.41    0.12 
   0  -6  -8    5.56    0.22 
   2  -6  -8   16.38    0.55 
   4  -6  -8    0.18    0.05 
   6  -6  -8   17.23    0.42 
   8  -6  -8    1.12    0.07 
  10  -6  -8    2.84    0.10 
  12  -6  -8    7.86    0.20 
  14  -6  -8   45.52    0.99 
  16  -6  -8   15.52    0.36 
  18  -6  -8   10.03    0.23 
 -15  -5  -8    2.54    0.06 
 -13  -5  -8   12.91    0.23 
 -11  -5  -8    1.26    0.05 
  -9  -5  -8    0.09    0.02 
  -7  -5  -8    2.02    0.07 
  -5  -5  -8    0.03    0.02 
  -3  -5  -8    0.84    0.07 
  -1  -5  -8    3.67    0.16 
   3  -5  -8    4.55    0.19 
   5  -5  -8    9.86    0.26 
   7  -5  -8    6.63    0.15 
   9  -5  -8   25.29    0.48 
  11  -5  -8    3.75    0.10 
  13  -5  -8   35.11    0.80 
  15  -5  -8   12.08    0.30 
  17  -5  -8   13.12    0.33 
  19  -5  -8    0.11    0.03 
  21  -5  -8    7.29    0.25 
 -16  -4  -8    7.02    0.13 
 -14  -4  -8    0.23    0.02 
 -12  -4  -8    9.69    0.18 
 -10  -4  -8    0.04    0.02 
  -8  -4  -8    7.28    0.13 
  -6  -4  -8   34.07    0.59 
  -4  -4  -8    6.99    0.24 
   6  -4  -8    9.82    0.35 
   8  -4  -8    1.22    0.08 
  10  -4  -8    0.81    0.06 
  12  -4  -8    2.93    0.15 
  14  -4  -8   11.80    0.30 
  16  -4  -8    5.48    0.16 
  18  -4  -8    5.73    0.16 
  20  -4  -8   17.22    0.57 
  22  -4  -8    0.28    0.04 
 -19  -3  -8    9.28    0.30 
 -17  -3  -8    2.56    0.06 
 -15  -3  -8    0.16    0.02 
 -13  -3  -8    1.83    0.05 
 -11  -3  -8    0.06    0.02 
  -9  -3  -8    1.37    0.04 
  -7  -3  -8   20.30    0.37 
  -5  -3  -8    0.11    0.04 
  -3  -3  -8    0.68    0.07 
  15  -3  -8   28.80    0.94 
  17  -3  -8   67.37    2.10 
 -20  -2  -8    0.07    0.02 
 -18  -2  -8    0.63    0.04 
 -16  -2  -8   16.39    0.30 
 -14  -2  -8   40.47    0.56 
 -12  -2  -8    0.06    0.02 
 -10  -2  -8    1.81    0.06 
  -8  -2  -8    6.95    0.27 
  -6  -2  -8   26.75    0.88 
  -4  -2  -8   57.81    1.85 
  -2  -2  -8   62.93    2.01 
   0  -2  -8    0.23    0.04 
 -19  -1  -8    1.36    0.05 
 -17  -1  -8   13.79    0.33 
 -15  -1  -8    0.06    0.02 
 -13  -1  -8   11.30    0.19 
 -11  -1  -8   11.15    0.19 
  -9  -1  -8   13.86    0.49 
  -7  -1  -8   79.64    2.54 
  -5  -1  -8    6.86    0.25 
  -3  -1  -8   39.85    1.25 
  -1  -1  -8    4.66    0.18 
   1  -1  -8    5.81    0.22 
   3  -1  -8  190.64    6.42 
 -20   0  -8    0.64    0.05 
 -18   0  -8   27.05    0.60 
 -16   0  -8   68.21    1.47 
 -14   0  -8  142.06    2.51 
 -12   0  -8   38.46    0.71 
 -10   0  -8    1.31    0.09 
  -8   0  -8    0.13    0.04 
  -6   0  -8   26.36    0.89 
  -4   0  -8  118.66    3.82 
  -2   0  -8    2.63    0.12 
   0   0  -8    0.30    0.04 
   2   0  -8   86.31    2.76 
   4   0  -8    2.12    0.10 
   6   0  -8   76.29    1.93 
   8   0  -8   23.58    0.62 
  10   0  -8   87.63    3.41 
  12   0  -8    0.87    0.07 
  14   0  -8   38.05    1.53 
  16   0  -8   15.04    0.63 
  18   0  -8    0.09    0.03 
  20   0  -8    4.86    0.23 
 -19   1  -8    1.42    0.08 
 -17   1  -8   14.19    0.33 
 -15   1  -8    0.10    0.04 
 -13   1  -8   11.76    0.41 
 -11   1  -8   10.98    0.29 
  -9   1  -8   13.81    0.49 
  -7   1  -8   76.65    2.54 
  -5   1  -8    6.67    0.25 
  -3   1  -8   37.72    1.25 
  -1   1  -8    4.68    0.19 
   1   1  -8    5.89    0.23 
   3   1  -8  202.18    6.43 
   5   1  -8   34.44    0.88 
   7   1  -8    2.89    0.10 
   9   1  -8   10.30    0.29 
  11   1  -8   18.27    0.40 
  13   1  -8    1.69    0.06 
  15   1  -8  134.52    3.52 
  17   1  -8   97.24    1.99 
  19   1  -8    1.18    0.05 
  21   1  -8   19.45    0.50 
 -18   2  -8    0.55    0.05 
 -16   2  -8   17.15    0.56 
 -14   2  -8   42.58    1.32 
 -12   2  -8    0.05    0.04 
 -10   2  -8    1.91    0.12 
  -8   2  -8    6.96    0.27 
  -6   2  -8   25.05    0.88 
  -4   2  -8   54.90    1.85 
  -2   2  -8   60.05    2.01 
   0   2  -8    0.25    0.04 
   2   2  -8    4.49    0.11 
   4   2  -8   22.64    0.48 
   6   2  -8   20.81    0.43 
   8   2  -8   13.05    0.28 
  10   2  -8   43.10    0.88 
  12   2  -8    7.92    0.16 
  14   2  -8   19.48    0.37 
  16   2  -8    8.34    0.15 
  18   2  -8    1.73    0.07 
  20   2  -8    4.87    0.15 
  22   2  -8   10.59    0.38 
 -17   3  -8    2.34    0.11 
 -15   3  -8    0.19    0.04 
 -13   3  -8    1.76    0.11 
 -11   3  -8    0.02    0.04 
  -9   3  -8    1.30    0.09 
  -7   3  -8   19.67    0.48 
  -3   3  -8    0.69    0.06 
  -1   3  -8   35.81    0.87 
   1   3  -8    0.52    0.04 
   3   3  -8  161.54    3.19 
   5   3  -8    6.15    0.15 
   7   3  -8    8.44    0.23 
   9   3  -8   35.47    0.83 
  11   3  -8    0.78    0.05 
  13   3  -8   32.41    0.66 
  15   3  -8   28.23    0.46 
  17   3  -8   65.45    1.03 
  19   3  -8    3.15    0.08 
  21   3  -8    4.69    0.19 
  23   3  -8    5.86    0.22 
 -16   4  -8    6.63    0.24 
 -14   4  -8    0.15    0.03 
 -12   4  -8    8.77    0.34 
 -10   4  -8    0.04    0.04 
  -8   4  -8    7.04    0.19 
  -6   4  -8   32.95    1.11 
  -4   4  -8    6.59    0.18 
  -2   4  -8   22.31    0.82 
   0   4  -8    8.79    0.24 
   2   4  -8   50.05    1.19 
   4   4  -8   12.87    0.33 
   6   4  -8   10.37    0.28 
   8   4  -8    1.33    0.06 
  10   4  -8    0.80    0.05 
  12   4  -8    3.10    0.11 
  14   4  -8   12.57    0.27 
  16   4  -8    5.65    0.12 
  18   4  -8    5.69    0.14 
  20   4  -8   18.18    0.60 
  22   4  -8    0.26    0.04 
 -11   5  -8    1.20    0.08 
  -9   5  -8    0.09    0.03 
  -7   5  -8    1.86    0.07 
  -5   5  -8    0.07    0.02 
  -3   5  -8    0.74    0.04 
  -1   5  -8    3.70    0.11 
   1   5  -8    0.95    0.07 
   3   5  -8    4.61    0.20 
   5   5  -8   10.63    0.28 
   7   5  -8    6.99    0.20 
   9   5  -8   26.70    0.64 
  11   5  -8    3.87    0.13 
  13   5  -8   35.57    0.71 
  15   5  -8   12.04    0.33 
  17   5  -8   13.86    0.48 
  19   5  -8    0.16    0.03 
  21   5  -8    7.53    0.26 
  -8   6  -8    0.67    0.06 
  -6   6  -8   45.99    1.45 
  -4   6  -8    3.90    0.11 
  -2   6  -8    2.32    0.07 
   0   6  -8    5.65    0.16 
   2   6  -8   16.62    0.60 
   4   6  -8    0.19    0.04 
   6   6  -8   17.82    0.63 
   8   6  -8    1.21    0.08 
  10   6  -8    2.76    0.10 
  16   6  -8   15.19    0.52 
  18   6  -8    9.70    0.23 
  -7   7  -8    0.96    0.06 
  -5   7  -8    0.05    0.03 
  -3   7  -8   12.25    0.41 
  -1   7  -8    2.39    0.11 
   1   7  -8    0.13    0.02 
  -2  -8  -7    1.87    0.08 
   0  -8  -7    1.66    0.08 
   2  -8  -7    1.26    0.07 
   4  -8  -7    1.58    0.08 
   6  -8  -7    9.26    0.29 
   8  -8  -7    7.79    0.19 
  10  -8  -7    1.36    0.07 
  -9  -7  -7    8.09    0.26 
  -7  -7  -7    5.32    0.19 
  -5  -7  -7   14.69    0.48 
  -3  -7  -7    0.26    0.04 
  -1  -7  -7    2.28    0.11 
   1  -7  -7    4.86    0.19 
   3  -7  -7    0.98    0.08 
   5  -7  -7    0.22    0.04 
   7  -7  -7    2.86    0.10 
   9  -7  -7   24.99    0.55 
  11  -7  -7    3.88    0.12 
  13  -7  -7    0.11    0.03 
  15  -7  -7    2.84    0.08 
  17  -7  -7    3.10    0.12 
 -12  -6  -7    0.25    0.02 
 -10  -6  -7   11.22    0.25 
  -8  -6  -7    7.01    0.17 
  -6  -6  -7    1.14    0.08 
  -4  -6  -7    0.48    0.06 
  -2  -6  -7    5.26    0.20 
   0  -6  -7    0.45    0.04 
   2  -6  -7   17.89    0.42 
   4  -6  -7    1.36    0.06 
   6  -6  -7   21.85    0.42 
   8  -6  -7   22.28    0.52 
  10  -6  -7    1.40    0.07 
  12  -6  -7    4.66    0.14 
  14  -6  -7    3.69    0.12 
  16  -6  -7   12.41    0.29 
  18  -6  -7   36.82    0.80 
  20  -6  -7    5.17    0.18 
 -15  -5  -7   22.89    0.39 
 -13  -5  -7   51.99    0.86 
 -11  -5  -7    5.04    0.10 
  -9  -5  -7    2.62    0.07 
  -7  -5  -7    7.49    0.19 
  -5  -5  -7   28.94    0.62 
   3  -5  -7  117.40    3.57 
   5  -5  -7   11.57    0.40 
   7  -5  -7   32.28    0.75 
   9  -5  -7   14.76    0.36 
  11  -5  -7   11.30    0.23 
  13  -5  -7    6.50    0.19 
  15  -5  -7   12.78    0.33 
  17  -5  -7    0.70    0.05 
  19  -5  -7   21.51    0.69 
  21  -5  -7    0.63    0.06 
 -18  -4  -7    0.82    0.03 
 -16  -4  -7    0.19    0.02 
 -14  -4  -7    0.14    0.02 
 -12  -4  -7    6.63    0.12 
 -10  -4  -7    6.21    0.11 
  -8  -4  -7    1.20    0.04 
  -6  -4  -7    2.22    0.11 
   6  -4  -7   32.76    1.07 
   8  -4  -7    7.30    0.27 
  10  -4  -7   13.66    0.48 
  14  -4  -7    7.79    0.31 
  16  -4  -7   22.18    0.53 
  18  -4  -7   13.55    0.48 
  20  -4  -7    7.72    0.29 
  22  -4  -7    8.02    0.29 
  24  -4  -7    1.13    0.06 
 -19  -3  -7    4.52    0.09 
 -17  -3  -7    0.03    0.01 
 -15  -3  -7    2.76    0.06 
 -13  -3  -7   15.52    0.25 
 -11  -3  -7   26.40    0.41 
  -9  -3  -7    1.15    0.04 
  -7  -3  -7   10.94    0.40 
  -5  -3  -7    3.88    0.17 
  -3  -3  -7    0.10    0.03 
   9  -3  -7    1.87    0.09 
  17  -3  -7    1.24    0.10 
  19  -3  -7    2.97    0.15 
  21  -3  -7    0.17    0.05 
 -20  -2  -7    6.62    0.16 
 -18  -2  -7   18.79    0.33 
 -16  -2  -7   26.32    0.37 
 -14  -2  -7    4.84    0.09 
 -12  -2  -7   58.83    0.80 
 -10  -2  -7    0.05    0.04 
  -8  -2  -7    0.23    0.04 
  -6  -2  -7    1.12    0.08 
  -4  -2  -7    0.22    0.04 
  -2  -2  -7  132.91    4.19 
   0  -2  -7   70.75    2.31 
 -21  -1  -7    0.38    0.03 
 -19  -1  -7    0.07    0.02 
 -17  -1  -7    6.42    0.17 
 -15  -1  -7    0.04    0.02 
 -13  -1  -7    1.26    0.04 
 -11  -1  -7   16.85    0.59 
  -9  -1  -7    0.45    0.06 
  -7  -1  -7    5.61    0.22 
  -5  -1  -7    0.21    0.04 
  -3  -1  -7   17.62    0.59 
  -1  -1  -7   84.73    2.72 
  19  -1  -7   14.71    0.60 
  21  -1  -7    0.59    0.08 
 -20   0  -7    0.02    0.02 
 -18   0  -7   -0.01    0.02 
 -16   0  -7    0.01    0.02 
 -14   0  -7    0.04    0.02 
 -12   0  -7    0.02    0.02 
 -10   0  -7    0.04    0.03 
  -8   0  -7    0.04    0.03 
  -6   0  -7    0.13    0.03 
  -4   0  -7    0.03    0.02 
  -2   0  -7    0.04    0.02 
   4   0  -7    0.07    0.02 
   6   0  -7    0.01    0.02 
   8   0  -7    0.00    0.02 
  10   0  -7    0.15    0.03 
  12   0  -7    0.07    0.02 
  14   0  -7    0.05    0.02 
  16   0  -7    0.13    0.03 
  18   0  -7    0.05    0.02 
  20   0  -7    0.02    0.04 
 -21   1  -7    0.30    0.04 
 -19   1  -7   -0.01    0.03 
 -17   1  -7    6.44    0.17 
 -15   1  -7    0.04    0.02 
 -13   1  -7    1.20    0.09 
 -11   1  -7   16.56    0.58 
  -9   1  -7    0.44    0.06 
  -7   1  -7    5.47    0.22 
  -5   1  -7    0.20    0.04 
  -3   1  -7   16.86    0.59 
  -1   1  -7   83.56    2.72 
   1   1  -7    0.23    0.04 
   3   1  -7   17.84    0.47 
   5   1  -7    9.90    0.27 
   7   1  -7    1.48    0.05 
   9   1  -7    1.18    0.04 
  11   1  -7   11.26    0.22 
  13   1  -7   32.21    0.59 
  15   1  -7   30.19    0.82 
  17   1  -7    3.96    0.14 
  19   1  -7   16.03    0.35 
  21   1  -7    0.68    0.04 
 -20   2  -7    6.72    0.24 
 -18   2  -7   18.36    0.61 
 -16   2  -7   26.46    0.86 
 -14   2  -7    4.93    0.21 
 -12   2  -7   59.88    1.87 
  -8   2  -7    0.23    0.04 
  -6   2  -7    1.02    0.07 
  -2   2  -7  124.00    4.20 
   0   2  -7   70.75    1.67 
   2   2  -7   97.02    1.96 
   4   2  -7  298.19    5.97 
   6   2  -7   19.32    0.40 
   8   2  -7    4.16    0.10 
  10   2  -7    6.33    0.15 
  12   2  -7    8.08    0.19 
  14   2  -7   31.37    0.67 
  16   2  -7    5.29    0.14 
  18   2  -7   26.76    0.57 
  20   2  -7   36.76    0.76 
  22   2  -7   16.76    0.57 
  24   2  -7    7.08    0.26 
 -17   3  -7    0.07    0.03 
 -15   3  -7    2.58    0.13 
 -13   3  -7   14.57    0.52 
 -11   3  -7   26.23    0.87 
  -9   3  -7    1.14    0.06 
  -3   3  -7    0.10    0.02 
  -1   3  -7   23.18    0.56 
   1   3  -7    0.96    0.04 
   3   3  -7   29.92    0.72 
   5   3  -7    0.05    0.02 
   7   3  -7   23.19    0.56 
   9   3  -7    2.09    0.08 
  11   3  -7   38.53    0.91 
  13   3  -7    9.34    0.26 
  15   3  -7   13.17    0.35 
  17   3  -7    1.14    0.05 
  19   3  -7    2.89    0.07 
  21   3  -7    0.06    0.03 
  23   3  -7    5.44    0.21 
  25   3  -7    0.10    0.02 
 -14   4  -7    0.14    0.04 
 -12   4  -7    6.39    0.25 
 -10   4  -7    5.86    0.17 
  -8   4  -7    1.18    0.06 
  -6   4  -7    2.24    0.08 
  -4   4  -7    0.66    0.06 
  -2   4  -7    0.09    0.03 
   0   4  -7    2.04    0.08 
   2   4  -7    1.61    0.07 
   4   4  -7   13.77    0.35 
   6   4  -7   34.16    0.83 
   8   4  -7    7.75    0.21 
  10   4  -7   15.46    0.39 
  12   4  -7    0.83    0.05 
  14   4  -7    8.55    0.20 
  16   4  -7   22.81    0.47 
  18   4  -7   13.86    0.26 
  20   4  -7    7.84    0.29 
  22   4  -7    8.48    0.30 
  24   4  -7    1.14    0.06 
 -11   5  -7    4.19    0.18 
  -9   5  -7    2.55    0.09 
  -7   5  -7    7.41    0.20 
  -5   5  -7   28.01    0.55 
  -3   5  -7   15.03    0.31 
  -1   5  -7   21.35    0.74 
   1   5  -7    2.03    0.11 
   3   5  -7  120.54    3.96 
   5   5  -7   12.09    0.31 
   7   5  -7   33.42    0.80 
   9   5  -7   15.36    0.38 
  11   5  -7   11.82    0.31 
  13   5  -7    6.88    0.17 
  15   5  -7   13.61    0.29 
  19   5  -7   20.87    0.73 
  21   5  -7    0.60    0.05 
 -10   6  -7   10.73    0.38 
  -8   6  -7    7.29    0.26 
  -6   6  -7    1.20    0.07 
  -4   6  -7    0.43    0.04 
  -2   6  -7    5.14    0.12 
   0   6  -7    0.49    0.06 
   2   6  -7   18.02    0.64 
   4   6  -7    1.37    0.09 
   6   6  -7   22.13    0.78 
   8   6  -7   22.12    0.77 
  10   6  -7    1.28    0.06 
  12   6  -7    4.28    0.20 
  18   6  -7   35.92    1.18 
  -9   7  -7    8.53    0.29 
  -7   7  -7    5.77    0.20 
  -5   7  -7   16.04    0.52 
  -3   7  -7    0.23    0.03 
  -1   7  -7    2.31    0.11 
  -2   8  -7    1.89    0.08 
   0   8  -7    1.59    0.07 
   0  -8  -6   -0.01    0.02 
   2  -8  -6    0.34    0.04 
   4  -8  -6   20.64    0.63 
   6  -8  -6    4.59    0.12 
   8  -8  -6    7.59    0.18 
  10  -8  -6    0.27    0.03 
  -9  -7  -6   17.52    0.56 
  -7  -7  -6    0.31    0.04 
  -5  -7  -6    0.05    0.03 
  -3  -7  -6    4.75    0.19 
  -1  -7  -6   22.30    0.74 
   1  -7  -6    5.34    0.21 
   3  -7  -6   29.34    0.93 
   5  -7  -6    2.61    0.10 
   7  -7  -6    2.41    0.09 
   9  -7  -6    3.10    0.10 
  11  -7  -6    7.27    0.18 
  13  -7  -6    4.25    0.12 
  15  -7  -6    2.68    0.08 
  17  -7  -6   13.61    0.43 
 -14  -6  -6    0.34    0.02 
 -12  -6  -6    0.07    0.02 
 -10  -6  -6    0.04    0.02 
  -8  -6  -6    0.44    0.05 
  -6  -6  -6    0.48    0.05 
  -4  -6  -6   21.69    0.68 
  -2  -6  -6    7.35    0.19 
   0  -6  -6    6.11    0.17 
   2  -6  -6   12.37    0.30 
   4  -6  -6   10.58    0.22 
   6  -6  -6   10.31    0.21 
   8  -6  -6   30.41    0.48 
  10  -6  -6    1.28    0.07 
  12  -6  -6    0.43    0.05 
  14  -6  -6    8.94    0.23 
  16  -6  -6   37.72    0.84 
  18  -6  -6    9.54    0.23 
  20  -6  -6    4.35    0.16 
 -17  -5  -6   20.23    0.35 
 -15  -5  -6   24.45    0.41 
 -13  -5  -6    2.29    0.06 
 -11  -5  -6   66.98    1.11 
  -9  -5  -6   63.33    1.07 
  -7  -5  -6    3.30    0.10 
   1  -5  -6    8.54    0.30 
   3  -5  -6   57.16    1.75 
   5  -5  -6   11.03    0.38 
   7  -5  -6    8.66    0.30 
   9  -5  -6   13.86    0.35 
  11  -5  -6    3.59    0.09 
  13  -5  -6   14.16    0.28 
  15  -5  -6   47.47    1.08 
  17  -5  -6    1.17    0.07 
  19  -5  -6   14.07    0.47 
  21  -5  -6    0.64    0.06 
  23  -5  -6    8.00    0.27 
 -18  -4  -6    2.29    0.06 
 -16  -4  -6    2.77    0.07 
 -14  -4  -6    5.06    0.10 
 -12  -4  -6   14.40    0.23 
 -10  -4  -6    0.34    0.02 
  -8  -4  -6    0.92    0.05 
  -6  -4  -6    0.66    0.07 
   6  -4  -6   66.06    2.06 
   8  -4  -6   81.54    2.58 
  10  -4  -6   19.63    0.67 
  12  -4  -6   30.26    0.94 
  14  -4  -6    4.19    0.19 
  16  -4  -6  108.38    2.40 
  18  -4  -6   85.52    2.69 
  20  -4  -6    9.28    0.34 
  22  -4  -6   24.07    0.78 
  24  -4  -6    1.34    0.07 
 -21  -3  -6    2.58    0.10 
 -19  -3  -6   32.04    0.49 
 -17  -3  -6   14.29    0.23 
 -15  -3  -6   27.30    0.38 
 -13  -3  -6   73.25    0.99 
 -11  -3  -6  124.63    2.14 
  -9  -3  -6   77.45    2.47 
  -7  -3  -6   39.94    1.34 
  -5  -3  -6   99.61    3.19 
  -3  -3  -6   47.58    1.63 
   7  -3  -6   93.19    2.96 
   9  -3  -6    5.98    0.22 
  19  -3  -6    0.69    0.08 
  21  -3  -6   11.70    0.40 
  23  -3  -6    0.88    0.08 
 -22  -2  -6    0.07    0.02 
 -20  -2  -6   19.13    0.43 
 -18  -2  -6    0.35    0.03 
 -16  -2  -6    6.03    0.10 
 -14  -2  -6   12.29    0.18 
 -12  -2  -6   22.60    0.42 
 -10  -2  -6    0.47    0.06 
  -8  -2  -6   17.84    0.60 
  -6  -2  -6   16.33    0.56 
  -4  -2  -6   37.22    1.20 
  -2  -2  -6   54.15    1.73 
   8  -2  -6  201.45    6.24 
 -21  -1  -6   33.10    0.73 
 -19  -1  -6   15.31    0.36 
 -17  -1  -6    0.06    0.02 
 -15  -1  -6  148.59    2.22 
 -13  -1  -6  141.67    2.46 
 -11  -1  -6   99.96    3.27 
  -9  -1  -6   96.67    3.07 
  -7  -1  -6  159.36    4.95 
  -5  -1  -6  328.38   10.37 
  -3  -1  -6   51.06    1.61 
   7  -1  -6  200.98    8.18 
   9  -1  -6    0.78    0.05 
  11  -1  -6   80.16    3.28 
  13  -1  -6   37.39    1.03 
  15  -1  -6   61.05    2.21 
  17  -1  -6   46.94    1.79 
  19  -1  -6    4.90    0.23 
  21  -1  -6    9.78    0.41 
 -22   0  -6    0.00    0.02 
 -20   0  -6   12.57    0.30 
 -18   0  -6    0.18    0.03 
 -16   0  -6   26.26    0.60 
 -14   0  -6    0.27    0.03 
 -12   0  -6   18.06    0.63 
 -10   0  -6   14.01    0.49 
  -8   0  -6   38.00    1.25 
  -6   0  -6   15.62    0.53 
  -4   0  -6   30.58    1.00 
   4   0  -6  405.15   16.12 
   6   0  -6  158.65    6.27 
   8   0  -6  246.74    9.67 
  10   0  -6  107.30    2.83 
  12   0  -6  165.15    4.31 
  14   0  -6  126.25    3.27 
  16   0  -6   69.86    1.84 
  18   0  -6  114.95    2.98 
  20   0  -6  233.83    5.96 
  22   0  -6   51.82    1.82 
 -21   1  -6   32.50    1.05 
 -19   1  -6   14.96    0.36 
 -17   1  -6    0.11    0.03 
 -15   1  -6  148.90    3.19 
 -13   1  -6  140.90    4.40 
 -11   1  -6  102.42    3.27 
  -9   1  -6   96.15    3.06 
  -7   1  -6  153.25    4.95 
  -5   1  -6  316.64   10.37 
  -3   1  -6   46.26    1.61 
   1   1  -6   65.26    2.63 
   3   1  -6   80.12    3.26 
   5   1  -6  154.04    6.29 
   7   1  -6  204.19    8.20 
   9   1  -6    0.84    0.06 
  11   1  -6   83.23    1.73 
  13   1  -6   38.99    0.82 
  15   1  -6   64.01    1.31 
  17   1  -6   52.24    1.34 
  19   1  -6    5.10    0.13 
  21   1  -6   10.12    0.23 
 -20   2  -6   17.52    0.61 
 -18   2  -6    0.28    0.05 
 -16   2  -6    5.80    0.24 
 -14   2  -6   12.09    0.43 
 -12   2  -6   21.22    0.73 
  -6   2  -6   16.48    0.56 
  -4   2  -6   35.57    1.20 
  -2   2  -6   51.81    1.25 
   0   2  -6   80.78    2.15 
   2   2  -6   31.27    0.82 
   4   2  -6  133.89    3.06 
   6   2  -6  132.85    3.05 
   8   2  -6  215.29    6.97 
  10   2  -6   44.05    1.46 
  12   2  -6  148.28    3.54 
  14   2  -6   35.79    0.88 
  16   2  -6   88.81    1.84 
  18   2  -6  165.97    2.89 
  20   2  -6   94.27    1.90 
  22   2  -6   38.00    1.24 
  24   2  -6    1.22    0.07 
 -17   3  -6   13.69    0.48 
 -15   3  -6   26.04    0.87 
 -13   3  -6   72.18    2.30 
 -11   3  -6  122.89    3.92 
  -5   3  -6   95.58    3.32 
  -3   3  -6   50.10    1.18 
  -1   3  -6  126.20    2.93 
   1   3  -6    7.91    0.21 
   3   3  -6    0.92    0.04 
   5   3  -6   47.48    1.13 
   7   3  -6   97.96    2.28 
   9   3  -6    6.30    0.24 
  11   3  -6   29.41    0.98 
  13   3  -6    7.95    0.23 
  15   3  -6  120.31    2.89 
  17   3  -6   28.63    0.58 
  19   3  -6    0.69    0.04 
  21   3  -6   12.08    0.41 
  23   3  -6    0.90    0.06 
  25   3  -6   14.15    0.49 
 -12   4  -6   14.26    0.49 
 -10   4  -6    0.33    0.03 
  -8   4  -6    0.91    0.05 
  -6   4  -6    0.58    0.06 
  -4   4  -6    0.17    0.03 
  -2   4  -6   19.72    0.67 
   0   4  -6    0.09    0.03 
   2   4  -6    0.03    0.02 
   4   4  -6    0.18    0.03 
   6   4  -6   65.78    1.59 
   8   4  -6   84.56    1.99 
  10   4  -6   22.65    0.74 
  12   4  -6   30.79    1.05 
  14   4  -6    4.13    0.14 
  16   4  -6  113.50    2.68 
  18   4  -6   88.57    1.73 
  20   4  -6    8.81    0.33 
  22   4  -6   25.31    0.82 
  24   4  -6    1.35    0.07 
 -11   5  -6   63.83    2.16 
  -9   5  -6   64.09    2.07 
  -7   5  -6    3.35    0.11 
  -5   5  -6   17.21    0.34 
  -3   5  -6    2.64    0.13 
  -1   5  -6   77.74    2.56 
   1   5  -6    8.72    0.32 
   3   5  -6   57.13    1.93 
   5   5  -6   10.89    0.29 
   7   5  -6    8.44    0.23 
   9   5  -6   14.43    0.37 
  11   5  -6    3.69    0.12 
  13   5  -6   14.63    0.31 
  15   5  -6   47.71    0.96 
  17   5  -6    1.30    0.10 
  19   5  -6   13.49    0.48 
  21   5  -6    0.49    0.05 
 -12   6  -6    0.05    0.03 
 -10   6  -6    0.04    0.03 
  -8   6  -6    0.35    0.05 
  -6   6  -6    0.44    0.04 
  -4   6  -6   21.61    0.52 
  -2   6  -6    7.65    0.29 
   0   6  -6    6.34    0.25 
   2   6  -6   12.78    0.46 
   4   6  -6   11.23    0.40 
   6   6  -6   10.52    0.38 
   8   6  -6   30.36    1.05 
  10   6  -6    1.17    0.06 
  12   6  -6    0.40    0.04 
  -9   7  -6   18.93    0.61 
  -7   7  -6    0.37    0.04 
  -5   7  -6    0.06    0.03 
  -3   7  -6    4.89    0.19 
  -6   8  -6    0.08    0.02 
  -4   8  -6    3.22    0.13 
  -2   8  -6    2.91    0.12 
   4  -8  -5    2.66    0.11 
   6  -8  -5    5.54    0.14 
   8  -8  -5   25.18    0.56 
  10  -8  -5    6.11    0.15 
  12  -8  -5    1.07    0.04 
  -5  -7  -5   20.17    0.66 
  -3  -7  -5   14.68    0.50 
  -1  -7  -5   34.31    1.11 
   1  -7  -5   21.76    0.72 
   3  -7  -5    0.05    0.04 
   5  -7  -5    1.23    0.06 
   7  -7  -5    0.61    0.04 
   9  -7  -5    2.48    0.07 
  11  -7  -5    1.08    0.06 
  13  -7  -5    2.05    0.08 
  15  -7  -5    0.91    0.05 
  17  -7  -5    1.31    0.07 
 -14  -6  -5   27.22    0.56 
 -12  -6  -5    1.13    0.04 
 -10  -6  -5   16.74    0.38 
  -8  -6  -5   21.48    0.69 
  -6  -6  -5    0.17    0.04 
  -4  -6  -5   19.13    0.63 
  -2  -6  -5    0.98    0.05 
   0  -6  -5   39.72    0.88 
   2  -6  -5    0.93    0.07 
   4  -6  -5   26.93    0.51 
   6  -6  -5    0.37    0.03 
   8  -6  -5   10.97    0.19 
  10  -6  -5   15.83    0.26 
  12  -6  -5   44.92    0.77 
  14  -6  -5   30.41    0.68 
  16  -6  -5    2.80    0.10 
  18  -6  -5   53.68    1.59 
  20  -6  -5   68.36    2.00 
 -17  -5  -5    0.02    0.01 
 -15  -5  -5   10.42    0.19 
 -13  -5  -5   16.80    0.27 
 -11  -5  -5   14.24    0.23 
  -9  -5  -5   13.73    0.26 
  -7  -5  -5   45.50    1.37 
   1  -5  -5   12.46    0.38 
   3  -5  -5   12.29    0.41 
   5  -5  -5   10.67    0.36 
   7  -5  -5    9.60    0.31 
   9  -5  -5   17.67    0.59 
  11  -5  -5    0.09    0.02 
  13  -5  -5    1.82    0.06 
  15  -5  -5    0.94    0.07 
  17  -5  -5    8.00    0.22 
  19  -5  -5    0.89    0.08 
  21  -5  -5    3.13    0.13 
  23  -5  -5    0.85    0.06 
 -20  -4  -5    7.49    0.14 
 -18  -4  -5    2.68    0.06 
 -16  -4  -5    2.08    0.05 
 -14  -4  -5   11.32    0.19 
 -12  -4  -5    2.20    0.06 
 -10  -4  -5   15.58    0.29 
  -8  -4  -5   63.39    2.07 
  -6  -4  -5    2.44    0.12 
   4  -4  -5   55.24    1.64 
   6  -4  -5    1.50    0.08 
   8  -4  -5    6.57    0.24 
  10  -4  -5   31.94    1.06 
  12  -4  -5   99.98    3.01 
  16  -4  -5    0.08    0.05 
  18  -4  -5   95.62    2.98 
  20  -4  -5   73.46    2.28 
  22  -4  -5    5.52    0.22 
  24  -4  -5    0.45    0.05 
 -21  -3  -5    0.18    0.02 
 -19  -3  -5    7.42    0.15 
 -17  -3  -5    1.14    0.04 
 -15  -3  -5   16.10    0.23 
 -13  -3  -5    3.83    0.08 
 -11  -3  -5    4.60    0.20 
  -9  -3  -5   13.22    0.46 
  -7  -3  -5  109.33    2.64 
  -5  -3  -5   99.55    2.40 
  -3  -3  -5    5.86    0.23 
   7  -3  -5    1.21    0.06 
   9  -3  -5   58.34    1.88 
  11  -3  -5   13.79    0.44 
  19  -3  -5   11.54    0.41 
  21  -3  -5   29.14    0.91 
  23  -3  -5    3.52    0.16 
  25  -3  -5    0.70    0.06 
 -22  -2  -5    1.38    0.05 
 -20  -2  -5    3.60    0.08 
 -18  -2  -5    0.24    0.02 
 -16  -2  -5   28.22    0.39 
 -14  -2  -5   34.95    0.53 
 -12  -2  -5    0.06    0.03 
 -10  -2  -5    8.72    0.24 
  -8  -2  -5   74.52    1.82 
  -6  -2  -5   28.84    0.72 
  -4  -2  -5    9.54    0.26 
   8  -2  -5    7.31    0.25 
  14  -2  -5    5.04    0.23 
  16  -2  -5   46.09    1.68 
  18  -2  -5   30.36    1.14 
  20  -2  -5    6.52    0.20 
  22  -2  -5    6.74    0.26 
 -21  -1  -5    1.78    0.07 
 -19  -1  -5   12.19    0.29 
 -17  -1  -5    2.10    0.07 
 -15  -1  -5   37.56    0.67 
 -13  -1  -5    0.72    0.07 
 -11  -1  -5   18.17    0.63 
  -9  -1  -5   13.30    0.34 
  -7  -1  -5   33.92    0.85 
  -5  -1  -5   64.95    1.62 
   9  -1  -5    5.28    0.23 
  11  -1  -5   55.32    1.47 
  13  -1  -5    7.37    0.22 
  15  -1  -5   34.69    0.96 
  17  -1  -5   13.70    0.54 
  19  -1  -5    4.76    0.23 
  21  -1  -5   13.38    0.52 
 -22   0  -5    0.01    0.03 
 -20   0  -5    0.01    0.02 
 -18   0  -5    0.01    0.02 
 -16   0  -5    0.02    0.02 
 -14   0  -5   -0.02    0.03 
 -12   0  -5    0.00    0.03 
 -10   0  -5    0.13    0.03 
  -8   0  -5    0.01    0.02 
  -6   0  -5    0.00    0.02 
   8   0  -5    0.04    0.02 
  10   0  -5    0.01    0.02 
  12   0  -5    0.03    0.02 
  14   0  -5    0.00    0.02 
  16   0  -5    0.01    0.02 
  18   0  -5    0.02    0.02 
  20   0  -5    0.02    0.02 
  22   0  -5    0.01    0.04 
 -21   1  -5    1.64    0.10 
 -19   1  -5   11.89    0.29 
 -17   1  -5    2.09    0.08 
 -15   1  -5   36.98    1.20 
 -11   1  -5   19.13    0.63 
  -9   1  -5   13.26    0.45 
  -7   1  -5   33.55    1.12 
   9   1  -5    5.32    0.20 
  11   1  -5   55.54    1.98 
  13   1  -5    7.99    0.31 
  15   1  -5   39.06    1.30 
  17   1  -5   14.50    0.54 
  19   1  -5    4.71    0.12 
  21   1  -5   13.26    0.29 
  23   1  -5    0.34    0.04 
 -20   2  -5    3.37    0.15 
 -18   2  -5    0.30    0.05 
 -16   2  -5   27.39    0.63 
 -14   2  -5   34.36    1.11 
  -6   2  -5   29.18    0.96 
  -4   2  -5    9.26    0.34 
   6   2  -5   37.07    1.22 
  12   2  -5   10.44    0.41 
  14   2  -5    5.45    0.23 
  16   2  -5   47.37    1.68 
  18   2  -5   31.67    0.63 
  20   2  -5    6.79    0.17 
  22   2  -5    6.96    0.26 
  24   2  -5    0.73    0.05 
 -15   3  -5   16.10    0.54 
 -13   3  -5    3.78    0.17 
  -5   3  -5   98.14    2.46 
  -3   3  -5    6.58    0.24 
  -1   3  -5    0.63    0.03 
   1   3  -5  278.03    6.49 
   3   3  -5   48.58    1.16 
   5   3  -5   57.08    1.94 
   7   3  -5    1.19    0.07 
  13   3  -5   10.47    0.40 
  15   3  -5   26.47    0.98 
  19   3  -5   11.78    0.25 
  21   3  -5   28.01    0.69 
  23   3  -5    3.55    0.15 
  25   3  -5    0.73    0.05 
 -12   4  -5    2.07    0.11 
 -10   4  -5   15.68    0.54 
  -8   4  -5   61.65    2.15 
  -6   4  -5    2.17    0.11 
  -4   4  -5   53.72    1.35 
  -2   4  -5    4.24    0.17 
   0   4  -5   68.17    2.30 
   2   4  -5   13.81    0.34 
   4   4  -5   53.03    1.26 
   6   4  -5    1.40    0.07 
   8   4  -5    6.82    0.26 
  10   4  -5   34.01    1.17 
  14   4  -5    8.90    0.37 
  16   4  -5    0.06    0.03 
  18   4  -5   98.57    2.40 
  20   4  -5   72.23    2.44 
  22   4  -5    5.53    0.21 
  24   4  -5    0.40    0.04 
 -13   5  -5   16.11    0.57 
 -11   5  -5   14.41    0.50 
  -9   5  -5   13.92    0.48 
  -7   5  -5   45.70    1.10 
  -5   5  -5   16.74    0.60 
  -3   5  -5   24.92    0.85 
  -1   5  -5   82.89    2.72 
   1   5  -5   10.59    0.40 
   3   5  -5   11.96    0.43 
   5   5  -5   10.42    0.27 
   7   5  -5    8.49    0.24 
   9   5  -5   17.77    0.64 
  11   5  -5    0.12    0.03 
  13   5  -5    1.82    0.08 
  15   5  -5    0.88    0.06 
  17   5  -5    8.10    0.32 
  21   5  -5    2.73    0.12 
  23   5  -5    0.89    0.05 
 -10   6  -5   17.47    0.58 
  -8   6  -5   21.78    0.53 
  -6   6  -5    0.18    0.03 
  -4   6  -5   20.00    0.70 
  -2   6  -5    1.04    0.07 
   0   6  -5   41.05    1.37 
   2   6  -5    0.86    0.06 
   4   6  -5   25.99    0.91 
   6   6  -5    0.33    0.04 
   8   6  -5   10.37    0.39 
  10   6  -5   14.69    0.39 
  12   6  -5   40.75    0.85 
  14   6  -5   30.92    1.05 
 -13   7  -5    2.16    0.09 
 -11   7  -5    9.43    0.33 
  -9   7  -5   30.99    0.95 
  -7   7  -5    7.10    0.26 
  -5   7  -5   20.76    0.71 
  -1   7  -5   35.13    1.23 
   1   7  -5   22.83    0.79 
   3   7  -5    0.03    0.02 
   5   7  -5    1.11    0.07 
  -6   8  -5    0.77    0.05 
  -4   8  -5    6.94    0.25 
   4  -8  -4    2.93    0.13 
   6  -8  -4    0.04    0.03 
   8  -8  -4    0.72    0.07 
  10  -8  -4    9.73    0.23 
  12  -8  -4   31.79    0.70 
   1  -7  -4   27.12    0.87 
   3  -7  -4    0.20    0.04 
   5  -7  -4    0.82    0.06 
   7  -7  -4    3.68    0.10 
   9  -7  -4    4.49    0.11 
  11  -7  -4   20.55    0.37 
  13  -7  -4    7.09    0.18 
  15  -7  -4    9.06    0.22 
  17  -7  -4    6.92    0.24 
 -16  -6  -4   10.72    0.23 
 -14  -6  -4   39.67    0.80 
 -12  -6  -4    0.04    0.02 
 -10  -6  -4   14.89    0.47 
  -4  -6  -4    0.51    0.06 
  -2  -6  -4    6.45    0.25 
   0  -6  -4   16.18    0.53 
   2  -6  -4   52.17    1.55 
   4  -6  -4   71.64    1.54 
   6  -6  -4    0.92    0.05 
   8  -6  -4   11.15    0.19 
  10  -6  -4    7.32    0.14 
  12  -6  -4   33.45    0.59 
  14  -6  -4    2.19    0.07 
  16  -6  -4    1.49    0.07 
  18  -6  -4    0.24    0.05 
  20  -6  -4    3.60    0.14 
 -19  -5  -4   12.10    0.26 
 -17  -5  -4   55.65    1.10 
 -15  -5  -4   11.81    0.22 
 -13  -5  -4    0.71    0.03 
 -11  -5  -4    0.47    0.03 
  -9  -5  -4    8.34    0.20 
  -7  -5  -4   42.87    1.29 
  -1  -5  -4    0.15    0.03 
   1  -5  -4   34.15    1.04 
   3  -5  -4    8.31    0.28 
   5  -5  -4    0.18    0.03 
   7  -5  -4    8.54    0.30 
   9  -5  -4    1.98    0.10 
  11  -5  -4   13.63    0.34 
  13  -5  -4   40.72    0.64 
  15  -5  -4    5.35    0.13 
  17  -5  -4   65.02    1.99 
  19  -5  -4    1.25    0.10 
  21  -5  -4    4.21    0.17 
  23  -5  -4    1.99    0.09 
 -20  -4  -4    0.45    0.02 
 -18  -4  -4    0.36    0.02 
 -16  -4  -4    9.43    0.15 
 -14  -4  -4   69.29    0.94 
 -12  -4  -4    0.06    0.02 
 -10  -4  -4    0.00    0.03 
  -8  -4  -4   12.29    0.45 
  -6  -4  -4   16.24    0.43 
   4  -4  -4   92.77    2.69 
   6  -4  -4  103.12    3.06 
   8  -4  -4   11.75    0.39 
  10  -4  -4    0.04    0.02 
  12  -4  -4    0.02    0.02 
  14  -4  -4    3.56    0.15 
  16  -4  -4   52.35    1.72 
  18  -4  -4   53.06    1.65 
  20  -4  -4   18.41    0.60 
  22  -4  -4    0.98    0.08 
  24  -4  -4    0.30    0.04 
 -21  -3  -4    3.87    0.09 
 -19  -3  -4   17.40    0.27 
 -17  -3  -4   38.17    0.52 
 -15  -3  -4   99.89    1.33 
 -13  -3  -4    9.61    0.17 
 -11  -3  -4    0.52    0.06 
  -9  -3  -4   31.19    0.79 
  -7  -3  -4    0.33    0.03 
  -5  -3  -4   23.35    0.59 
  -3  -3  -4   10.31    0.41 
   5  -3  -4   22.61    0.68 
   7  -3  -4   23.06    0.70 
   9  -3  -4   19.74    0.65 
  11  -3  -4    9.77    0.33 
  13  -3  -4   10.53    0.44 
  15  -3  -4   13.56    0.55 
  17  -3  -4   84.79    3.10 
  19  -3  -4    0.84    0.07 
  21  -3  -4    8.28    0.31 
  23  -3  -4    3.17    0.15 
  25  -3  -4    0.86    0.07 
 -22  -2  -4    4.93    0.13 
 -20  -2  -4    1.48    0.05 
 -18  -2  -4    1.52    0.05 
 -16  -2  -4    2.24    0.05 
 -14  -2  -4   51.82    1.69 
 -12  -2  -4   16.35    0.56 
 -10  -2  -4   11.75    0.31 
  -8  -2  -4  192.58    4.65 
  -6  -2  -4    2.08    0.07 
  -4  -2  -4   37.36    1.39 
  -2  -2  -4    0.21    0.03 
   6  -2  -4  237.39    7.27 
   8  -2  -4    1.22    0.06 
  10  -2  -4   44.86    1.07 
  12  -2  -4    1.17    0.08 
  14  -2  -4    9.97    0.40 
  16  -2  -4   27.52    1.03 
  18  -2  -4   63.07    2.19 
  20  -2  -4   44.57    1.05 
  22  -2  -4    5.15    0.21 
  24  -2  -4    0.01    0.03 
  26  -2  -4    1.40    0.08 
 -23  -1  -4    0.01    0.03 
 -21  -1  -4   17.84    0.41 
 -19  -1  -4    9.32    0.23 
 -17  -1  -4   62.95    1.14 
 -15  -1  -4  162.48    3.63 
 -13  -1  -4   12.76    0.45 
 -11  -1  -4   10.00    0.27 
  -9  -1  -4   84.99    2.07 
  -7  -1  -4   67.67    1.67 
  -5  -1  -4   46.96    1.76 
  -3  -1  -4   89.12    3.16 
   9  -1  -4  240.98    9.18 
  11  -1  -4  124.69    3.21 
  13  -1  -4   67.73    1.83 
  15  -1  -4   -0.01    0.03 
  17  -1  -4    4.09    0.20 
  19  -1  -4    0.69    0.08 
  21  -1  -4   14.41    0.56 
 -22   0  -4   15.75    0.53 
 -20   0  -4    0.16    0.03 
 -18   0  -4    1.84    0.07 
 -16   0  -4   11.27    0.40 
 -14   0  -4   26.28    0.88 
 -12   0  -4   20.95    0.71 
 -10   0  -4   22.97    0.77 
  -8   0  -4  340.63    8.04 
  -6   0  -4   11.72    0.45 
  -4   0  -4    6.29    0.26 
   8   0  -4    0.37    0.04 
  10   0  -4  211.10    7.43 
  12   0  -4   16.90    0.60 
  14   0  -4   47.91    1.65 
  16   0  -4   12.47    0.35 
  18   0  -4   37.90    1.01 
  20   0  -4   22.69    0.62 
  22   0  -4   24.06    0.84 
 -23   1  -4    0.05    0.03 
 -21   1  -4   16.66    0.58 
 -19   1  -4    9.31    0.23 
 -17   1  -4   61.80    1.37 
 -15   1  -4  159.39    5.05 
  -9   1  -4   88.22    2.75 
   9   1  -4  226.75    8.11 
  11   1  -4  116.27    4.30 
  13   1  -4   71.48    2.46 
  15   1  -4    0.03    0.04 
  17   1  -4    4.55    0.21 
  19   1  -4    0.69    0.05 
  21   1  -4   14.04    0.31 
  23   1  -4   10.11    0.36 
 -20   2  -4    1.48    0.09 
 -18   2  -4    1.40    0.09 
 -16   2  -4    2.07    0.08 
  -6   2  -4    1.96    0.10 
  14   2  -4   10.76    0.41 
  16   2  -4   30.37    1.04 
  18   2  -4   61.42    1.53 
  20   2  -4   44.03    1.08 
  22   2  -4    5.29    0.21 
  24   2  -4    0.02    0.02 
  -7   3  -4    0.26    0.04 
  -5   3  -4   23.59    0.60 
  -3   3  -4   10.10    0.36 
  -1   3  -4   54.43    1.85 
   1   3  -4   65.88    2.22 
  13   3  -4   11.94    0.44 
  15   3  -4   14.45    0.55 
  17   3  -4   91.43    3.09 
  19   3  -4    0.66    0.05 
  21   3  -4    8.21    0.22 
  23   3  -4    3.19    0.13 
  25   3  -4    0.85    0.05 
 -12   4  -4    0.08    0.04 
  -8   4  -4   12.51    0.46 
  -6   4  -4   16.31    0.43 
  -4   4  -4   18.89    0.49 
  -2   4  -4    1.27    0.07 
   0   4  -4   10.86    0.39 
   2   4  -4   33.54    1.15 
   4   4  -4   90.79    2.97 
  12   4  -4    0.05    0.04 
  14   4  -4    3.43    0.18 
  16   4  -4   54.67    1.98 
  18   4  -4   51.44    1.90 
  20   4  -4   17.77    0.62 
  22   4  -4    1.00    0.07 
  24   4  -4    0.36    0.04 
 -13   5  -4    0.71    0.07 
 -11   5  -4    0.51    0.06 
  -9   5  -4    8.51    0.22 
  -7   5  -4   43.03    1.48 
  -5   5  -4    0.05    0.03 
  -3   5  -4   29.01    0.99 
  -1   5  -4    0.14    0.03 
   1   5  -4   31.35    1.13 
   3   5  -4    7.90    0.29 
   5   5  -4    0.17    0.03 
   7   5  -4    8.54    0.31 
   9   5  -4    1.87    0.09 
  13   5  -4   41.46    1.48 
  15   5  -4    5.33    0.25 
  17   5  -4   65.10    2.20 
  21   5  -4    3.66    0.16 
  23   5  -4    1.92    0.08 
 -14   6  -4   37.40    1.27 
 -12   6  -4    0.01    0.03 
 -10   6  -4   15.44    0.52 
  -8   6  -4    0.20    0.03 
  -6   6  -4   13.46    0.47 
  -4   6  -4    0.52    0.05 
  -2   6  -4    6.92    0.26 
   0   6  -4   16.40    0.57 
   2   6  -4   48.91    1.70 
   4   6  -4   68.94    2.35 
   6   6  -4    0.91    0.06 
   8   6  -4   10.94    0.39 
  10   6  -4    6.83    0.20 
  12   6  -4   32.15    0.81 
 -13   7  -4    0.03    0.03 
 -11   7  -4    3.39    0.14 
  -9   7  -4    1.26    0.08 
  -7   7  -4   24.74    0.84 
  -3   7  -4    2.80    0.13 
  -1   7  -4    2.43    0.11 
   1   7  -4   27.42    0.95 
   3   7  -4    0.19    0.03 
   5   7  -4    0.75    0.05 
  -8   8  -4    0.08    0.03 
  -6   8  -4    7.92    0.29 
  -4   8  -4    0.13    0.03 
   4  -8  -3   33.24    1.07 
   6  -8  -3    1.30    0.06 
   8  -8  -3    3.53    0.10 
  10  -8  -3    1.12    0.08 
  12  -8  -3    0.09    0.03 
   3  -7  -3    7.78    0.29 
   5  -7  -3    4.03    0.12 
   7  -7  -3    0.06    0.02 
   9  -7  -3   16.36    0.31 
  11  -7  -3    0.02    0.02 
  13  -7  -3    4.39    0.10 
  15  -7  -3   19.58    0.46 
  17  -7  -3    0.20    0.03 
 -16  -6  -3    3.22    0.09 
 -14  -6  -3    3.58    0.10 
 -12  -6  -3    1.40    0.06 
 -10  -6  -3    0.11    0.04 
  -2  -6  -3    0.01    0.03 
   0  -6  -3    0.65    0.06 
   2  -6  -3   53.30    1.59 
   4  -6  -3   31.50    0.95 
   6  -6  -3    0.54    0.05 
   8  -6  -3    2.32    0.06 
  10  -6  -3   13.19    0.22 
  12  -6  -3    0.14    0.03 
  14  -6  -3    0.18    0.03 
  16  -6  -3    1.13    0.06 
  18  -6  -3    2.82    0.13 
  20  -6  -3    0.37    0.04 
 -19  -5  -3   13.51    0.24 
 -17  -5  -3    0.23    0.03 
 -15  -5  -3   33.98    0.59 
 -13  -5  -3   41.90    0.73 
 -11  -5  -3    0.18    0.03 
  -9  -5  -3   10.14    0.20 
  -3  -5  -3   47.02    1.50 
  -1  -5  -3    4.30    0.17 
   1  -5  -3    0.01    0.02 
   3  -5  -3   34.04    1.02 
   5  -5  -3    0.20    0.04 
   7  -5  -3    5.23    0.19 
   9  -5  -3    0.13    0.03 
  11  -5  -3   14.57    0.48 
  13  -5  -3   48.02    0.75 
  15  -5  -3    1.07    0.05 
  17  -5  -3    0.15    0.05 
  19  -5  -3    4.82    0.21 
  21  -5  -3    0.10    0.04 
  23  -5  -3    0.36    0.04 
 -20  -4  -3    0.55    0.03 
 -18  -4  -3   72.73    1.06 
 -16  -4  -3    0.52    0.03 
 -14  -4  -3    7.40    0.14 
 -12  -4  -3    1.74    0.06 
 -10  -4  -3   18.19    0.64 
  -8  -4  -3    0.38    0.04 
  -6  -4  -3    7.54    0.22 
  -4  -4  -3    0.22    0.04 
   2  -4  -3  115.67    3.46 
   4  -4  -3    0.02    0.02 
   6  -4  -3   23.43    0.73 
   8  -4  -3    0.55    0.05 
  10  -4  -3   70.21    2.16 
  12  -4  -3    0.02    0.03 
  14  -4  -3    0.52    0.08 
  16  -4  -3    1.62    0.09 
  18  -4  -3    1.31    0.08 
  20  -4  -3    8.22    0.31 
  22  -4  -3    0.54    0.06 
  24  -4  -3    1.33    0.08 
 -23  -3  -3    1.61    0.08 
 -21  -3  -3    0.11    0.02 
 -19  -3  -3   14.04    0.23 
 -17  -3  -3   53.34    0.72 
 -15  -3  -3   75.26    1.14 
 -13  -3  -3   12.45    0.44 
 -11  -3  -3    9.38    0.26 
  -9  -3  -3   10.79    0.29 
  -7  -3  -3   26.72    0.66 
  -5  -3  -3   86.02    2.09 
  -3  -3  -3    2.87    0.14 
   5  -3  -3    0.09    0.02 
   7  -3  -3    2.44    0.10 
   9  -3  -3   27.93    0.68 
  11  -3  -3   47.30    1.12 
  13  -3  -3   44.94    1.04 
  15  -3  -3   19.23    0.74 
  17  -3  -3    3.91    0.21 
  19  -3  -3    2.69    0.11 
  21  -3  -3    0.39    0.06 
  23  -3  -3    0.02    0.04 
  25  -3  -3    5.72    0.21 
 -24  -2  -3    3.70    0.15 
 -22  -2  -3    4.29    0.12 
 -20  -2  -3    1.01    0.04 
 -18  -2  -3    0.03    0.02 
 -16  -2  -3    2.53    0.06 
 -14  -2  -3   14.88    0.53 
 -12  -2  -3   18.10    0.47 
 -10  -2  -3   36.00    0.89 
  -8  -2  -3    0.41    0.03 
  -6  -2  -3   63.31    2.27 
  -4  -2  -3   27.99    1.04 
  -2  -2  -3  179.65    6.59 
   6  -2  -3   60.40    1.77 
   8  -2  -3    3.14    0.12 
  10  -2  -3   89.30    2.09 
  12  -2  -3    9.89    0.40 
  14  -2  -3   29.03    1.05 
  16  -2  -3    0.33    0.06 
  18  -2  -3    8.61    0.36 
  20  -2  -3    1.47    0.08 
  22  -2  -3    0.57    0.07 
  24  -2  -3    0.07    0.04 
  26  -2  -3    3.87    0.15 
 -23  -1  -3    1.11    0.05 
 -21  -1  -3    0.03    0.02 
 -19  -1  -3   19.95    0.46 
 -17  -1  -3   44.26    1.01 
 -15  -1  -3   20.31    0.69 
 -13  -1  -3   51.06    1.24 
 -11  -1  -3   18.49    0.47 
  -9  -1  -3    1.09    0.05 
  -7  -1  -3   18.82    0.73 
  -5  -1  -3   40.21    1.47 
  -3  -1  -3  138.35    4.83 
  -1  -1  -3  105.54    3.77 
   9  -1  -3    6.45    0.26 
  11  -1  -3   32.64    0.87 
  15  -1  -3    1.49    0.07 
  17  -1  -3    2.38    0.09 
  19  -1  -3    0.54    0.08 
  21  -1  -3    0.05    0.03 
  23  -1  -3    0.04    0.04 
  25  -1  -3    1.33    0.09 
 -24   0  -3   -0.01    0.02 
 -22   0  -3    0.00    0.02 
 -20   0  -3    0.00    0.02 
 -18   0  -3    0.19    0.04 
 -14   0  -3    0.03    0.03 
 -12   0  -3    0.01    0.02 
 -10   0  -3    0.01    0.02 
  -8   0  -3    0.02    0.02 
  -6   0  -3    0.97    0.06 
  -4   0  -3    0.01    0.01 
  12   0  -3    0.06    0.03 
  14   0  -3    0.01    0.03 
  16   0  -3    0.03    0.03 
  18   0  -3    0.08    0.04 
  20   0  -3   -0.01    0.02 
  22   0  -3   -0.02    0.04 
 -23   1  -3    1.07    0.07 
 -21   1  -3    0.05    0.04 
 -19   1  -3   19.77    0.46 
 -17   1  -3   43.70    0.98 
  -5   1  -3   37.79    1.46 
   9   1  -3    5.89    0.24 
  11   1  -3   32.55    1.16 
  15   1  -3    1.61    0.10 
  17   1  -3    2.53    0.14 
  19   1  -3    0.39    0.04 
  21   1  -3    0.05    0.02 
  23   1  -3    0.00    0.02 
 -16   2  -3    2.56    0.13 
  -6   2  -3   59.72    2.26 
  10   2  -3   92.56    3.19 
  12   2  -3   10.65    0.40 
  14   2  -3   29.71    1.05 
  16   2  -3    0.38    0.06 
  18   2  -3    8.35    0.23 
  20   2  -3    1.42    0.07 
  22   2  -3    0.66    0.06 
  24   2  -3    0.03    0.02 
  -9   3  -3   10.54    0.39 
  -7   3  -3   26.06    0.67 
  -5   3  -3   86.24    2.13 
  -3   3  -3    2.81    0.11 
   9   3  -3   27.24    0.98 
  11   3  -3   49.19    1.71 
  13   3  -3   44.75    1.59 
  15   3  -3   19.00    0.72 
  17   3  -3    3.90    0.20 
  19   3  -3    2.68    0.10 
  21   3  -3    0.32    0.05 
  23   3  -3    0.01    0.02 
  25   3  -3    5.83    0.21 
 -14   4  -3    7.12    0.28 
 -12   4  -3    1.69    0.10 
 -10   4  -3   18.17    0.65 
  -8   4  -3    0.37    0.05 
  -6   4  -3    7.79    0.22 
  -4   4  -3    0.15    0.02 
  -2   4  -3    1.68    0.08 
   0   4  -3    9.53    0.34 
   2   4  -3  126.44    3.83 
  12   4  -3    0.02    0.04 
  14   4  -3    0.44    0.07 
  16   4  -3    1.64    0.12 
  18   4  -3    1.35    0.11 
  20   4  -3    7.80    0.30 
  22   4  -3    0.62    0.05 
  24   4  -3    1.34    0.07 
 -15   5  -3   32.08    1.10 
 -13   5  -3   41.05    1.37 
 -11   5  -3    0.09    0.04 
  -9   5  -3   10.34    0.27 
  -7   5  -3   19.79    0.69 
  -5   5  -3   11.12    0.40 
  -3   5  -3   49.98    1.65 
  -1   5  -3    4.30    0.17 
   1   5  -3    0.02    0.02 
  13   5  -3   51.50    1.74 
  15   5  -3    1.04    0.11 
  21   5  -3    0.03    0.02 
 -16   6  -3    3.22    0.13 
 -14   6  -3    3.75    0.15 
 -12   6  -3    1.52    0.09 
 -10   6  -3    0.07    0.02 
  -8   6  -3    0.05    0.02 
  -6   6  -3    0.55    0.06 
  -4   6  -3    0.12    0.03 
  -2   6  -3    0.03    0.02 
   2   6  -3   51.18    1.74 
  12   6  -3    0.15    0.03 
 -15   7  -3   15.11    0.46 
 -13   7  -3   18.57    0.60 
 -11   7  -3    0.07    0.03 
  -9   7  -3    3.58    0.15 
  -7   7  -3    0.20    0.04 
  -5   7  -3    0.08    0.03 
  -3   7  -3    9.67    0.36 
  -1   7  -3   33.34    1.16 
   1   7  -3    2.09    0.10 
 -10   8  -3    0.56    0.05 
  -8   8  -3    0.07    0.03 
  -6   8  -3    1.81    0.09 
   2  -8  -2   36.32    1.17 
   4  -8  -2    1.29    0.06 
   6  -8  -2    1.74    0.07 
   8  -8  -2    0.22    0.03 
  10  -8  -2    0.87    0.05 
  12  -8  -2    2.26    0.10 
   3  -7  -2    7.04    0.19 
   5  -7  -2   13.54    0.33 
   7  -7  -2    5.81    0.16 
   9  -7  -2   10.42    0.26 
  11  -7  -2    3.74    0.09 
  13  -7  -2    2.26    0.07 
  15  -7  -2    8.02    0.20 
  17  -7  -2    1.33    0.07 
 -18  -6  -2   32.05    0.65 
 -16  -6  -2    2.39    0.08 
 -14  -6  -2   16.55    0.36 
 -12  -6  -2   11.61    0.27 
   0  -6  -2   10.61    0.36 
   2  -6  -2   92.73    2.75 
   4  -6  -2    6.07    0.22 
   6  -6  -2   13.85    0.33 
   8  -6  -2    5.04    0.10 
  10  -6  -2    0.06    0.02 
  12  -6  -2   20.02    0.37 
  14  -6  -2    3.36    0.09 
  16  -6  -2    1.30    0.10 
  18  -6  -2   16.51    0.54 
  20  -6  -2    2.98    0.12 
 -19  -5  -2    0.96    0.04 
 -17  -5  -2   43.27    0.73 
 -15  -5  -2   13.11    0.22 
 -13  -5  -2    3.54    0.09 
 -11  -5  -2   19.24    0.35 
  -9  -5  -2    6.79    0.29 
  -3  -5  -2   12.70    0.42 
  -1  -5  -2    7.02    0.25 
   1  -5  -2   17.76    0.56 
   3  -5  -2  104.45    3.05 
   5  -5  -2    1.78    0.09 
   7  -5  -2    0.36    0.05 
   9  -5  -2   35.34    1.09 
  11  -5  -2    0.74    0.07 
  13  -5  -2   28.30    0.52 
  15  -5  -2    0.48    0.05 
  17  -5  -2    5.68    0.24 
  19  -5  -2    8.04    0.30 
  21  -5  -2    2.56    0.12 
  23  -5  -2    1.08    0.06 
 -22  -4  -2    2.54    0.11 
 -20  -4  -2    0.03    0.02 
 -18  -4  -2    0.13    0.02 
 -16  -4  -2    5.67    0.11 
 -14  -4  -2    4.22    0.09 
 -12  -4  -2    2.79    0.15 
 -10  -4  -2    3.39    0.16 
  -8  -4  -2    0.62    0.04 
  -6  -4  -2   27.09    0.70 
  -4  -4  -2   21.19    0.84 
  -2  -4  -2    2.41    0.13 
   0  -4  -2    9.34    0.30 
   2  -4  -2    4.65    0.16 
   4  -4  -2   13.88    0.43 
   6  -4  -2   94.58    2.81 
   8  -4  -2    6.03    0.17 
  10  -4  -2    4.70    0.14 
  12  -4  -2    3.74    0.12 
  14  -4  -2  102.89    3.74 
  16  -4  -2    7.02    0.21 
  18  -4  -2   12.89    0.35 
  20  -4  -2    5.78    0.23 
  22  -4  -2    0.09    0.04 
  24  -4  -2    5.37    0.19 
 -23  -3  -2    0.05    0.02 
 -21  -3  -2    5.08    0.11 
 -19  -3  -2    9.86    0.15 
 -17  -3  -2    5.38    0.09 
 -15  -3  -2   12.75    0.22 
 -13  -3  -2    9.24    0.34 
 -11  -3  -2   40.79    1.01 
  -9  -3  -2    0.49    0.04 
  -7  -3  -2   28.21    0.69 
  -5  -3  -2   16.12    0.61 
  -3  -3  -2   86.19    3.13 
  -1  -3  -2    0.57    0.05 
   3  -3  -2  219.16    6.52 
   5  -3  -2    3.07    0.11 
   7  -3  -2   21.55    0.52 
   9  -3  -2   32.52    0.78 
  11  -3  -2   12.50    0.32 
  13  -3  -2  164.59    5.68 
  15  -3  -2    1.00    0.10 
  17  -3  -2   29.13    1.06 
  19  -3  -2   25.05    0.60 
  21  -3  -2    4.06    0.18 
  23  -3  -2    1.47    0.10 
  25  -3  -2    0.23    0.04 
 -24  -2  -2    2.81    0.12 
 -22  -2  -2    0.05    0.02 
 -20  -2  -2    0.24    0.03 
 -18  -2  -2   44.79    0.61 
 -16  -2  -2   26.47    0.49 
 -14  -2  -2   51.32    1.71 
 -12  -2  -2    9.62    0.27 
 -10  -2  -2   41.92    1.02 
  -8  -2  -2    2.76    0.09 
  -6  -2  -2    5.52    0.21 
  -4  -2  -2    8.97    0.35 
  -2  -2  -2   15.54    0.58 
   0  -2  -2   66.16    2.31 
   8  -2  -2   50.72    1.64 
  10  -2  -2  150.84    3.53 
  12  -2  -2    0.31    0.05 
  14  -2  -2   40.87    1.44 
  16  -2  -2   34.97    1.22 
  18  -2  -2    1.36    0.11 
  20  -2  -2    9.49    0.26 
  22  -2  -2    0.17    0.05 
  24  -2  -2    6.02    0.23 
  26  -2  -2    0.20    0.04 
 -25  -1  -2    1.53    0.08 
 -23  -1  -2    6.26    0.17 
 -21  -1  -2   38.85    0.86 
 -19  -1  -2    0.36    0.04 
 -17  -1  -2  100.21    2.24 
 -15  -1  -2   11.01    0.41 
 -13  -1  -2   46.79    1.15 
 -11  -1  -2    0.28    0.04 
  -9  -1  -2   31.74    1.20 
  -7  -1  -2   31.45    1.15 
  -5  -1  -2   73.76    2.57 
  -3  -1  -2  195.81    6.93 
  11  -1  -2  166.29    5.84 
  13  -1  -2    5.32    0.22 
  15  -1  -2   29.09    0.77 
  17  -1  -2   10.29    0.30 
  19  -1  -2   28.75    1.03 
  21  -1  -2    3.75    0.13 
  23  -1  -2   17.33    0.57 
  25  -1  -2    0.04    0.03 
 -24   0  -2    0.30    0.04 
 -22   0  -2    0.92    0.05 
 -20   0  -2    0.07    0.03 
 -18   0  -2   40.66    0.89 
 -12   0  -2   68.90    2.17 
 -10   0  -2   89.87    3.38 
  -8   0  -2   10.00    0.38 
  -6   0  -2    5.80    0.23 
  -4   0  -2   50.40    1.30 
  -2   0  -2  260.66    9.57 
  10   0  -2  542.17   18.66 
  12   0  -2   56.64    1.98 
  14   0  -2   23.32    0.83 
  16   0  -2   48.92    1.74 
  18   0  -2   30.03    1.10 
  20   0  -2    1.98    0.06 
  22   0  -2    2.40    0.10 
 -21   1  -2   39.72    1.23 
 -19   1  -2    0.44    0.04 
 -17   1  -2  100.04    3.11 
  -7   1  -2   30.27    1.14 
  -5   1  -2   69.59    1.81 
  11   1  -2  170.26    4.06 
  13   1  -2    5.32    0.22 
  15   1  -2   28.99    1.03 
  17   1  -2   10.40    0.41 
  19   1  -2   27.70    0.68 
  21   1  -2    4.18    0.13 
  23   1  -2   16.40    0.58 
  -8   2  -2    2.69    0.13 
  -6   2  -2    4.88    0.21 
  10   2  -2  155.68    3.74 
  12   2  -2    0.30    0.03 
  14   2  -2   40.68    1.44 
  16   2  -2   33.02    1.21 
  18   2  -2    1.21    0.06 
  20   2  -2    9.31    0.25 
  22   2  -2    0.18    0.04 
  24   2  -2    6.14    0.22 
  -9   3  -2    0.49    0.03 
  -7   3  -2   27.96    0.71 
  -5   3  -2   15.63    0.40 
   9   3  -2   32.23    1.13 
  11   3  -2   12.70    0.33 
  13   3  -2  158.65    3.93 
  15   3  -2    0.96    0.09 
  17   3  -2   28.06    1.04 
  19   3  -2   24.17    0.61 
  21   3  -2    4.16    0.17 
  23   3  -2    1.56    0.08 
  25   3  -2    0.17    0.03 
 -14   4  -2    4.23    0.18 
 -10   4  -2    3.23    0.15 
  -8   4  -2    0.46    0.04 
  -6   4  -2   28.28    0.71 
  -4   4  -2   22.19    0.56 
  -2   4  -2    2.64    0.10 
  10   4  -2    4.50    0.17 
  12   4  -2    3.64    0.11 
  14   4  -2  104.25    3.71 
  16   4  -2    7.22    0.31 
  20   4  -2    5.67    0.22 
  22   4  -2    0.06    0.03 
  24   4  -2    5.42    0.19 
 -19   5  -2    0.96    0.07 
 -17   5  -2   39.98    1.26 
 -15   5  -2   12.43    0.45 
 -13   5  -2    3.61    0.16 
 -11   5  -2   18.87    0.47 
  -9   5  -2    7.40    0.29 
  -7   5  -2    2.00    0.10 
  -5   5  -2    4.87    0.19 
  -3   5  -2   12.96    0.45 
  -1   5  -2    6.96    0.20 
  11   5  -2    0.81    0.09 
  21   5  -2    2.26    0.10 
 -18   6  -2   31.23    0.94 
 -16   6  -2    2.40    0.11 
 -14   6  -2   16.76    0.57 
 -12   6  -2   12.16    0.42 
 -10   6  -2    0.03    0.02 
  -8   6  -2    0.11    0.03 
  -6   6  -2    1.68    0.09 
  -4   6  -2   18.86    0.64 
  -2   6  -2   45.10    1.48 
   0   6  -2   10.77    0.38 
 -15   7  -2    3.60    0.13 
 -13   7  -2    0.05    0.03 
 -11   7  -2    0.62    0.06 
  -9   7  -2    9.86    0.36 
  -7   7  -2    1.12    0.08 
  -5   7  -2    0.08    0.03 
  -3   7  -2    1.81    0.09 
  -1   7  -2    2.14    0.10 
   1   7  -2    5.35    0.21 
 -12   8  -2    0.09    0.02 
 -10   8  -2    0.01    0.03 
  -8   8  -2    0.25    0.04 
   2  -8  -1    6.62    0.25 
   4  -8  -1   36.86    0.81 
   6  -8  -1    2.56    0.08 
   8  -8  -1    0.78    0.05 
  10  -8  -1    2.55    0.08 
  12  -8  -1    7.47    0.26 
   1  -7  -1   30.43    1.02 
   3  -7  -1   16.53    0.38 
   5  -7  -1   40.12    0.87 
   7  -7  -1    0.05    0.03 
   9  -7  -1    0.91    0.06 
  11  -7  -1    4.55    0.13 
  13  -7  -1    2.03    0.07 
  15  -7  -1    1.83    0.09 
 -18  -6  -1    0.67    0.04 
 -16  -6  -1    0.00    0.02 
 -14  -6  -1   42.60    0.88 
 -12  -6  -1   52.09    1.08 
   0  -6  -1  147.49    4.45 
   2  -6  -1   55.35    1.70 
   4  -6  -1   36.43    1.12 
   6  -6  -1    4.83    0.14 
   8  -6  -1    0.04    0.02 
  10  -6  -1    0.54    0.04 
  12  -6  -1    3.28    0.09 
  14  -6  -1    0.01    0.02 
  16  -6  -1    0.89    0.09 
  18  -6  -1    1.91    0.10 
  20  -6  -1   14.16    0.46 
 -21  -5  -1    7.34    0.17 
 -19  -5  -1   42.86    0.73 
 -17  -5  -1  129.91    2.14 
 -15  -5  -1    5.09    0.10 
 -13  -5  -1    9.07    0.16 
 -11  -5  -1    1.36    0.05 
  -9  -5  -1    0.48    0.06 
  -1  -5  -1   76.34    2.34 
   1  -5  -1    7.43    0.26 
   3  -5  -1  123.01    3.56 
   5  -5  -1    8.26    0.29 
   7  -5  -1   11.59    0.38 
   9  -5  -1    0.12    0.03 
  11  -5  -1    2.18    0.09 
  13  -5  -1    5.18    0.11 
  15  -5  -1    0.66    0.05 
  17  -5  -1   28.48    0.91 
  19  -5  -1   16.35    0.54 
  21  -5  -1    9.78    0.32 
  23  -5  -1    0.78    0.06 
 -22  -4  -1    1.31    0.04 
 -20  -4  -1   10.83    0.21 
 -18  -4  -1   23.56    0.37 
 -16  -4  -1   42.50    0.66 
 -14  -4  -1  102.33    1.54 
 -12  -4  -1   15.30    0.54 
 -10  -4  -1   36.46    0.91 
  -8  -4  -1    1.37    0.10 
  -6  -4  -1   25.83    0.66 
  -4  -4  -1   34.49    1.36 
  -2  -4  -1    4.57    0.16 
   0  -4  -1  463.13   13.68 
   2  -4  -1  325.82    9.85 
   4  -4  -1    0.84    0.04 
   6  -4  -1    3.18    0.10 
   8  -4  -1    0.05    0.02 
  10  -4  -1    4.04    0.13 
  12  -4  -1   12.91    0.51 
  14  -4  -1    5.58    0.27 
  16  -4  -1    3.20    0.12 
  18  -4  -1   16.76    0.44 
  20  -4  -1   38.53    1.19 
  22  -4  -1   13.43    0.43 
  24  -4  -1    2.59    0.11 
 -23  -3  -1    6.16    0.16 
 -21  -3  -1    8.97    0.18 
 -19  -3  -1   33.29    0.53 
 -17  -3  -1   68.85    1.06 
 -15  -3  -1    2.84    0.10 
 -13  -3  -1    0.17    0.04 
 -11  -3  -1    1.27    0.06 
  -9  -3  -1   17.04    0.43 
  -7  -3  -1    5.79    0.16 
  -5  -3  -1   27.73    1.02 
  -3  -3  -1    5.65    0.23 
  -1  -3  -1  309.64   11.56 
   1  -3  -1  110.66    3.30 
   3  -3  -1  271.57    8.07 
   5  -3  -1    8.39    0.28 
   7  -3  -1   60.03    1.39 
   9  -3  -1    0.01    0.01 
  11  -3  -1    4.70    0.13 
  13  -3  -1    0.08    0.04 
  15  -3  -1   19.64    0.75 
  17  -3  -1   29.27    1.06 
  19  -3  -1   66.28    1.50 
  21  -3  -1    0.57    0.07 
  23  -3  -1    1.52    0.10 
  25  -3  -1    0.00    0.03 
 -24  -2  -1    0.22    0.04 
 -22  -2  -1   17.22    0.41 
 -20  -2  -1   45.24    0.86 
 -18  -2  -1   33.63    0.46 
 -16  -2  -1  191.54    6.32 
 -14  -2  -1   12.80    0.35 
 -12  -2  -1    8.17    0.22 
 -10  -2  -1   83.13    1.95 
  -8  -2  -1    0.51    0.05 
  -6  -2  -1   83.48    3.07 
  -4  -2  -1    2.76    0.12 
  -2  -2  -1  122.05    4.43 
   8  -2  -1    2.06    0.07 
  10  -2  -1    4.44    0.12 
  12  -2  -1   10.43    0.41 
  14  -2  -1    1.44    0.10 
  16  -2  -1    0.39    0.07 
  18  -2  -1    2.97    0.17 
  20  -2  -1   17.79    0.45 
  22  -2  -1    2.19    0.13 
  24  -2  -1    0.35    0.05 
  26  -2  -1   10.32    0.34 
 -25  -1  -1    0.32    0.04 
 -23  -1  -1    1.70    0.07 
 -21  -1  -1    0.31    0.04 
 -19  -1  -1    1.72    0.07 
 -17  -1  -1    5.55    0.22 
 -15  -1  -1    4.29    0.13 
 -13  -1  -1    0.03    0.02 
 -11  -1  -1   18.50    0.46 
  -9  -1  -1    1.87    0.09 
  -5  -1  -1    1.26    0.06 
  -3  -1  -1    4.92    0.19 
  -1  -1  -1   46.12    1.71 
  11  -1  -1    6.87    0.27 
  13  -1  -1    5.77    0.23 
  15  -1  -1    5.55    0.23 
  17  -1  -1    0.51    0.04 
  19  -1  -1   25.01    0.92 
  21  -1  -1    0.51    0.05 
  23  -1  -1    0.88    0.08 
  25  -1  -1    0.13    0.04 
 -24   0  -1   -0.01    0.03 
 -22   0  -1    0.01    0.02 
 -20   0  -1    0.06    0.03 
 -18   0  -1   -0.01    0.03 
 -12   0  -1    0.01    0.01 
 -10   0  -1    0.02    0.02 
  -8   0  -1    0.00    0.02 
  -6   0  -1    0.04    0.01 
  -4   0  -1    0.03    0.01 
  10   0  -1    0.09    0.03 
  12   0  -1    0.02    0.02 
  14   0  -1    0.02    0.03 
  16   0  -1    0.02    0.03 
  18   0  -1    0.02    0.04 
  20   0  -1    0.01    0.02 
  22   0  -1   -0.03    0.03 
  24   0  -1    0.00    0.03 
  26   0  -1    0.02    0.03 
 -19   1  -1    1.81    0.11 
  -9   1  -1    1.72    0.09 
  -7   1  -1    0.34    0.02 
  -5   1  -1    1.15    0.04 
  11   1  -1    6.93    0.19 
  13   1  -1    5.62    0.16 
  15   1  -1    5.19    0.22 
  17   1  -1    0.51    0.07 
  19   1  -1   24.61    0.61 
  21   1  -1    0.55    0.04 
 -10   2  -1   79.33    2.95 
  -8   2  -1    0.58    0.05 
  -6   2  -1   85.90    3.07 
  -4   2  -1    2.79    0.12 
  10   2  -1    4.44    0.12 
  12   2  -1   10.33    0.27 
  14   2  -1    1.47    0.06 
  16   2  -1    0.30    0.05 
  18   2  -1    2.79    0.10 
  20   2  -1   17.79    0.45 
  22   2  -1    2.44    0.11 
  24   2  -1    0.33    0.04 
 -11   3  -1    1.16    0.09 
  -9   3  -1   17.02    0.44 
  -7   3  -1    5.94    0.16 
  -5   3  -1   27.75    0.68 
   1   3  -1  110.26    4.00 
  11   3  -1    4.47    0.13 
  13   3  -1    0.07    0.02 
  15   3  -1   19.40    0.50 
  17   3  -1   28.04    1.03 
  19   3  -1   63.20    2.10 
  21   3  -1    0.69    0.06 
  23   3  -1    1.63    0.08 
  25   3  -1    0.00    0.02 
 -18   4  -1   21.55    0.72 
 -14   4  -1  103.68    3.35 
 -10   4  -1   36.28    1.25 
  -8   4  -1    1.43    0.06 
  -6   4  -1   27.08    0.67 
  -4   4  -1   36.98    0.92 
  -2   4  -1    4.69    0.13 
  10   4  -1    3.93    0.12 
  12   4  -1   12.33    0.33 
  14   4  -1    5.30    0.21 
  20   4  -1   36.84    1.25 
  22   4  -1   13.11    0.45 
  24   4  -1    2.58    0.10 
 -19   5  -1   41.05    1.25 
 -17   5  -1  124.19    3.71 
 -15   5  -1    5.10    0.20 
 -13   5  -1    9.37    0.33 
 -11   5  -1    1.37    0.06 
  -9   5  -1    0.59    0.06 
  -7   5  -1    6.64    0.25 
  -5   5  -1   31.35    1.06 
  -3   5  -1    7.30    0.27 
  -1   5  -1   79.11    1.92 
   1   5  -1    7.61    0.32 
  13   5  -1    5.06    0.20 
  21   5  -1    8.77    0.33 
 -18   6  -1    0.68    0.06 
 -16   6  -1    0.03    0.02 
 -14   6  -1   45.13    1.42 
 -12   6  -1   54.26    1.26 
 -10   6  -1   16.66    0.41 
  -8   6  -1   11.76    0.42 
  -6   6  -1    4.02    0.16 
  -4   6  -1    2.26    0.10 
  -2   6  -1  119.06    4.00 
 -17   7  -1   11.49    0.35 
 -15   7  -1   23.53    0.52 
 -13   7  -1    9.77    0.33 
 -11   7  -1   14.56    0.50 
  -9   7  -1    1.99    0.10 
  -7   7  -1   10.22    0.39 
  -5   7  -1    0.20    0.04 
  -3   7  -1    0.33    0.04 
  -1   7  -1    1.58    0.08 
 -12   8  -1   22.35    0.49 
 -10   8  -1   14.78    0.50 
  -8   8  -1    9.02    0.34 
   2  -8   0    0.23    0.03 
   4  -8   0    4.73    0.13 
   6  -8   0    1.62    0.07 
   8  -8   0    1.23    0.06 
  10  -8   0   14.37    0.32 
  12  -8   0    1.85    0.06 
   1  -7   0  136.65    2.92 
   3  -7   0   84.39    1.77 
   5  -7   0    4.10    0.12 
   7  -7   0    1.05    0.06 
   9  -7   0    3.15    0.10 
  11  -7   0   12.71    0.30 
  13  -7   0    3.20    0.10 
 -18  -6   0   10.50    0.20 
 -16  -6   0   40.47    0.70 
 -14  -6   0    1.66    0.07 
 -12  -6   0    3.16    0.10 
   2  -6   0   56.72    1.73 
   4  -6   0   57.16    1.73 
   6  -6   0    0.05    0.02 
   8  -6   0   16.53    0.32 
  10  -6   0   30.02    0.68 
  12  -6   0    3.26    0.10 
  14  -6   0    1.55    0.06 
  16  -6   0   39.29    0.86 
  18  -6   0    9.83    0.34 
 -21  -5   0   43.05    0.92 
 -19  -5   0    6.10    0.13 
 -17  -5   0    0.08    0.02 
 -15  -5   0    0.97    0.04 
 -13  -5   0    7.87    0.15 
 -11  -5   0    2.85    0.08 
  -9  -5   0   14.28    0.54 
  -1  -5   0  113.83    3.40 
   1  -5   0  112.76    3.40 
   3  -5   0   18.90    0.45 
   5  -5   0    0.01    0.02 
   7  -5   0    0.46    0.04 
   9  -5   0   15.57    0.39 
  11  -5   0    3.10    0.18 
  13  -5   0    7.67    0.17 
  15  -5   0    1.07    0.10 
  17  -5   0    0.13    0.05 
  19  -5   0    6.05    0.23 
  21  -5   0   43.44    1.30 
 -22  -4   0    6.67    0.14 
 -20  -4   0   12.60    0.24 
 -18  -4   0   16.55    0.27 
 -16  -4   0  123.76    1.84 
 -14  -4   0   90.23    1.37 
 -12  -4   0   56.86    1.79 
 -10  -4   0   53.14    1.34 
  -8  -4   0   50.07    1.26 
  -6  -4   0   13.68    0.36 
  -4  -4   0  374.09   13.64 
  -2  -4   0  537.95   12.04 
   0  -4   0  123.75    2.83 
   2  -4   0  513.78   12.03 
   4  -4   0  378.20    8.49 
   6  -4   0   13.99    0.34 
   8  -4   0   52.39    1.19 
  10  -4   0   55.45    1.26 
  12  -4   0   56.54    1.96 
  14  -4   0   91.14    3.21 
  16  -4   0  122.95    2.82 
  18  -4   0   16.34    0.42 
  20  -4   0   12.80    0.43 
  22  -4   0    7.32    0.25 
  24  -4   0    0.52    0.05 
 -23  -3   0    0.95    0.04 
 -21  -3   0   12.14    0.24 
 -19  -3   0  107.86    1.63 
 -17  -3   0  107.53    1.63 
 -15  -3   0   74.06    2.42 
 -13  -3   0    7.75    0.22 
 -11  -3   0    1.11    0.06 
  -9  -3   0   19.61    0.48 
  -7  -3   0   14.66    0.31 
  -5  -3   0  104.40    3.81 
  -3  -3   0   25.54    1.00 
  -1  -3   0   23.58    0.89 
   1  -3   0   24.34    0.73 
   3  -3   0   26.35    0.82 
   5  -3   0  103.43    2.37 
   7  -3   0   14.61    0.36 
   9  -3   0   19.18    0.45 
  11  -3   0    1.09    0.09 
  13  -3   0    7.80    0.33 
  15  -3   0   73.84    2.63 
  17  -3   0  109.95    2.49 
  19  -3   0  111.72    2.49 
  21  -3   0   12.81    0.43 
  23  -3   0    0.99    0.08 
  25  -3   0    2.14    0.10 
 -24  -2   0    0.12    0.04 
 -22  -2   0    2.20    0.13 
 -20  -2   0   32.48    0.77 
 -18  -2   0    3.86    0.08 
 -16  -2   0    1.46    0.10 
 -14  -2   0   36.72    0.93 
 -12  -2   0   97.28    2.31 
 -10  -2   0  245.83    5.68 
  -8  -2   0  141.92    5.01 
  -6  -2   0   42.81    1.56 
  -4  -2   0  259.49    9.69 
   6  -2   0   40.82    1.28 
   8  -2   0  133.57    3.11 
  10  -2   0  237.39    8.17 
  12  -2   0   95.91    3.33 
  14  -2   0   38.67    1.35 
  16  -2   0    1.39    0.11 
  18  -2   0    4.11    0.21 
  20  -2   0   32.58    0.79 
  22  -2   0    2.27    0.13 
  24  -2   0    0.13    0.04 
 -25  -1   0    0.50    0.06 
 -23  -1   0    3.90    0.18 
 -21  -1   0   12.83    0.32 
 -19  -1   0  147.94    3.27 
 -17  -1   0  152.19    4.80 
 -15  -1   0    1.31    0.06 
 -13  -1   0   14.60    0.38 
 -11  -1   0   72.31    1.76 
  -9  -1   0   57.88    2.04 
  -7  -1   0  140.24    4.83 
  -5  -1   0   15.73    0.58 
  -3  -1   0   18.08    0.67 
  -1  -1   0   12.00    0.44 
   9  -1   0   54.46    1.93 
  11  -1   0   74.44    2.54 
  13  -1   0   14.80    0.55 
  15  -1   0    1.42    0.10 
  17  -1   0  152.13    5.21 
  19  -1   0  151.63    3.45 
  21  -1   0   13.00    0.34 
  23  -1   0    3.99    0.17 
  25  -1   0    0.49    0.05 
 -22   0   0    0.53    0.06 
 -20   0   0  188.10    3.94 
 -12   0   0   34.23    1.24 
 -10   0   0  976.46   36.08 
  -8   0   0  147.10    5.37 
  -6   0   0  374.18   13.68 
  -4   0   0   49.74    1.82 
  10   0   0 1000.00   34.16 
  12   0   0   32.64    0.82 
  14   0   0    5.69    0.24 
  16   0   0  118.65    4.14 
  18   0   0    0.92    0.09 
  20   0   0  178.44    4.15 
  22   0   0    0.58    0.07 
  24   0   0    0.10    0.04 
  26   0   0   16.86    0.53 
 -19   1   0  155.42    4.54 
  -9   1   0   54.38    1.44 
  -7   1   0  128.32    3.42 
  -5   1   0   15.32    0.41 
  -3   1   0   18.26    0.67 
  11   1   0   71.86    1.75 
  13   1   0   14.86    0.38 
  15   1   0    1.28    0.06 
  17   1   0  143.91    5.20 
  19   1   0  152.40    2.82 
  21   1   0   13.33    0.27 
  23   1   0    4.06    0.17 
  25   1   0    0.53    0.06 
 -12   2   0   92.12    3.50 
 -10   2   0  233.52    8.63 
  -8   2   0  139.86    5.01 
  -6   2   0   43.64    1.57 
  -4   2   0  268.42    9.71 
  10   2   0  227.35    5.67 
  12   2   0   95.30    2.40 
  14   2   0   38.11    0.93 
  16   2   0    1.36    0.06 
  18   2   0    3.78    0.12 
  20   2   0   33.40    1.09 
  22   2   0    2.35    0.11 
  24   2   0    0.09    0.02 
 -19   3   0  106.35    3.18 
 -11   3   0    0.90    0.05 
  -9   3   0   19.03    0.49 
  -7   3   0   15.19    0.38 
  -5   3   0  106.06    3.82 
  -3   3   0   28.71    1.01 
   1   3   0   23.70    0.89 
   9   3   0   17.71    0.47 
  11   3   0    1.03    0.04 
  13   3   0    7.55    0.21 
  15   3   0   74.58    2.50 
  19   3   0  106.09    3.52 
  21   3   0   12.98    0.44 
  23   3   0    0.96    0.06 
 -20   4   0   12.01    0.40 
 -18   4   0   16.32    0.53 
 -16   4   0  116.80    3.99 
 -14   4   0   91.20    2.96 
 -12   4   0   51.61    1.85 
 -10   4   0   54.24    1.84 
  -8   4   0   51.81    1.29 
  -6   4   0   14.06    0.36 
  -4   4   0  366.02    9.21 
  -2   4   0  553.67   19.51 
   0   4   0  126.26    4.58 
   4   4   0  382.73   13.67 
   6   4   0   13.60    0.54 
  10   4   0   53.77    1.82 
  12   4   0   52.83    1.83 
  14   4   0   92.04    3.05 
  16   4   0  126.15    4.13 
  20   4   0   11.98    0.43 
  22   4   0    7.00    0.25 
 -21   5   0   41.27    1.26 
 -19   5   0    6.17    0.22 
 -17   5   0    0.12    0.04 
 -15   5   0    0.98    0.08 
 -13   5   0    7.61    0.29 
 -11   5   0    2.94    0.10 
  -9   5   0   15.03    0.54 
  -7   5   0    0.50    0.05 
  -5   5   0    0.00    0.02 
  -3   5   0   18.61    0.48 
  -1   5   0  114.88    4.15 
   1   5   0  108.90    4.15 
  11   5   0    3.01    0.12 
  13   5   0    7.21    0.28 
  21   5   0   42.13    1.39 
 -20   6   0    6.22    0.20 
 -18   6   0   10.69    0.34 
 -16   6   0   40.88    0.89 
 -14   6   0    1.87    0.10 
 -12   6   0    3.26    0.11 
 -10   6   0   30.70    0.73 
  -8   6   0   17.39    0.60 
  -6   6   0    0.05    0.03 
  -4   6   0   55.24    1.90 
  -2   6   0   56.21    1.90 
 -17   7   0   16.07    0.49 
 -15   7   0    4.42    0.12 
 -13   7   0    3.46    0.14 
 -11   7   0   12.59    0.44 
  -9   7   0    2.98    0.14 
  -7   7   0    0.94    0.07 
  -5   7   0    3.83    0.17 
  -3   7   0   78.18    2.77 
  -1   7   0  138.40    4.59 
 -12   8   0    1.91    0.06 
 -10   8   0   13.72    0.48 
  -8   8   0    1.11    0.07 
   0  -8   1   43.20    0.94 
   2  -8   1   91.43    1.95 
   4  -8   1    1.88    0.07 
   6  -8   1    2.34    0.08 
   8  -8   1   10.10    0.23 
  10  -8   1   14.88    0.45 
  12  -8   1   21.42    0.65 
  -1  -7   1   30.81    0.69 
   1  -7   1    1.91    0.08 
   3  -7   1    0.40    0.04 
   5  -7   1    0.22    0.03 
   7  -7   1   10.92    0.26 
   9  -7   1    2.13    0.08 
  11  -7   1   14.28    0.33 
  13  -7   1    8.80    0.22 
 -20  -6   1   14.64    0.31 
 -18  -6   1    1.90    0.06 
 -16  -6   1    0.95    0.05 
 -14  -6   1    0.04    0.02 
 -12  -6   1    3.11    0.09 
   2  -6   1  120.14    3.62 
   4  -6   1    2.16    0.09 
   6  -6   1    3.82    0.09 
   8  -6   1   11.17    0.24 
  10  -6   1   16.21    0.33 
  12  -6   1   53.15    1.15 
  14  -6   1   42.14    1.27 
 -21  -5   1    9.51    0.18 
 -19  -5   1   15.97    0.30 
 -17  -5   1   28.49    0.45 
 -15  -5   1    0.65    0.04 
 -13  -5   1    5.30    0.11 
 -11  -5   1    2.08    0.07 
  -9  -5   1    0.12    0.04 
  -7  -5   1   10.86    0.42 
  -3  -5   1  119.69    4.11 
  -1  -5   1    7.57    0.31 
   1  -5   1   76.04    1.77 
   3  -5   1    7.50    0.20 
   5  -5   1   30.75    0.73 
   7  -5   1    6.30    0.18 
   9  -5   1    0.58    0.09 
  11  -5   1    1.34    0.07 
  13  -5   1    8.95    0.20 
  15  -5   1    4.83    0.16 
  17  -5   1  122.21    3.82 
  19  -5   1   40.87    1.29 
  21  -5   1    7.11    0.25 
 -24  -4   1    2.47    0.11 
 -22  -4   1   12.89    0.24 
 -20  -4   1   38.27    0.66 
 -18  -4   1   17.08    0.28 
 -16  -4   1    3.04    0.07 
 -14  -4   1    5.27    0.13 
 -12  -4   1   12.90    0.46 
 -10  -4   1    4.15    0.13 
  -8  -4   1    0.05    0.02 
  -6  -4   1    2.99    0.08 
  -4  -4   1    0.87    0.07 
  -2  -4   1  329.95    7.39 
   0  -4   1  451.49   10.30 
   2  -4   1    4.59    0.13 
   4  -4   1   37.29    0.85 
   6  -4   1   26.79    0.63 
   8  -4   1    1.41    0.06 
  10  -4   1   38.57    1.33 
  12  -4   1   15.83    0.61 
  14  -4   1  103.38    3.64 
  16  -4   1   41.96    1.02 
  18  -4   1   23.74    0.75 
  20  -4   1   10.91    0.37 
  22  -4   1    1.35    0.09 
 -25  -3   1    0.00    0.03 
 -23  -3   1    1.53    0.05 
 -21  -3   1    0.57    0.04 
 -19  -3   1   63.62    0.98 
 -17  -3   1   28.01    0.45 
 -15  -3   1   20.20    0.69 
 -13  -3   1    0.12    0.03 
 -11  -3   1    4.79    0.14 
  -9  -3   1    0.02    0.02 
  -7  -3   1   60.07    1.21 
  -5  -3   1    8.31    0.33 
  -3  -3   1  252.05    9.79 
  -1  -3   1  114.33    4.01 
   1  -3   1  314.24    9.49 
   3  -3   1    5.62    0.19 
   5  -3   1   26.41    0.63 
   7  -3   1    5.77    0.16 
   9  -3   1   17.39    0.64 
  11  -3   1    1.32    0.10 
  13  -3   1    0.10    0.05 
  15  -3   1    2.69    0.17 
  17  -3   1   71.23    1.63 
  19  -3   1   34.43    0.81 
  21  -3   1    9.44    0.33 
  23  -3   1    6.54    0.23 
  25  -3   1    0.47    0.05 
 -24  -2   1    0.33    0.05 
 -22  -2   1    2.25    0.13 
 -20  -2   1   16.86    0.43 
 -18  -2   1    2.82    0.07 
 -16  -2   1    0.29    0.05 
 -14  -2   1    1.45    0.07 
 -12  -2   1   10.57    0.28 
 -10  -2   1    4.69    0.13 
  -8  -2   1    2.16    0.10 
  -6  -2   1   15.35    0.58 
  -4  -2   1  107.31    3.77 
  -2  -2   1  308.91   11.54 
   6  -2   1   82.10    2.53 
   8  -2   1    0.50    0.05 
  10  -2   1   81.23    2.81 
  12  -2   1    8.30    0.33 
  14  -2   1   13.43    0.52 
  16  -2   1  203.63    6.85 
  18  -2   1   34.00    0.80 
  20  -2   1   47.64    1.10 
  22  -2   1   18.27    0.59 
  24  -2   1    0.30    0.05 
 -25  -1   1    0.09    0.04 
 -23  -1   1    0.86    0.08 
 -21  -1   1    0.60    0.07 
 -19  -1   1   23.18    0.81 
 -15  -1   1    5.11    0.15 
 -13  -1   1    5.33    0.16 
 -11  -1   1    7.03    0.28 
  -9  -1   1    0.13    0.03 
  -7  -1   1   23.75    0.84 
  -5  -1   1    7.11    0.27 
  -3  -1   1  120.08    4.36 
  -1  -1   1    1.43    0.06 
   9  -1   1    1.85    0.09 
  11  -1   1   18.70    0.67 
  13  -1   1    0.05    0.03 
  15  -1   1    4.35    0.20 
  17  -1   1    5.18    0.25 
  19  -1   1    1.78    0.08 
  21  -1   1    0.37    0.06 
  23  -1   1    1.79    0.11 
  25  -1   1    0.30    0.04 
 -20   0   1    0.01    0.03 
 -14   0   1    0.02    0.02 
 -12   0   1   -0.02    0.02 
 -10   0   1    0.00    0.02 
  -8   0   1    0.03    0.02 
  -6   0   1    0.02    0.02 
  -4   0   1    0.02    0.01 
  -2   0   1    0.00    0.01 
  10   0   1    0.01    0.02 
  12   0   1    0.00    0.01 
  14   0   1    0.00    0.03 
  16   0   1    0.01    0.03 
  18   0   1    0.03    0.02 
  20   0   1    0.02    0.03 
  22   0   1    0.02    0.04 
  24   0   1    0.03    0.03 
  26   0   1    0.05    0.03 
 -11   1   1    7.01    0.28 
  -9   1   1    0.11    0.02 
  -7   1   1   21.99    0.59 
  -5   1   1    6.88    0.19 
  -3   1   1  117.00    4.34 
  -1   1   1    1.47    0.04 
   1   1   1   47.72    1.72 
  11   1   1   17.95    0.46 
  13   1   1    0.07    0.02 
  15   1   1    4.11    0.13 
  17   1   1    5.17    0.24 
  19   1   1    1.87    0.06 
  21   1   1    0.31    0.03 
  23   1   1    1.77    0.10 
  25   1   1    0.30    0.04 
 -10   2   1    4.58    0.20 
  -8   2   1    2.27    0.11 
  -6   2   1   15.28    0.41 
  -4   2   1   98.72    3.76 
  -2   2   1  318.97    8.18 
   2   2   1  120.05    4.44 
  10   2   1   77.61    1.94 
  12   2   1    8.07    0.22 
  14   2   1   13.20    0.34 
  16   2   1  195.50    6.59 
  18   2   1   32.96    0.76 
  20   2   1   48.08    1.05 
  22   2   1   18.28    0.42 
 -21   3   1    0.61    0.06 
 -19   3   1   64.26    1.91 
 -13   3   1   -0.01    0.04 
 -11   3   1    4.44    0.14 
  -9   3   1    0.04    0.01 
  -7   3   1   61.99    1.51 
  -5   3   1    8.86    0.34 
  -3   3   1  278.66    9.86 
  -1   3   1  106.47    2.84 
   1   3   1  320.09    8.20 
   3   3   1    5.58    0.23 
   9   3   1   15.82    0.57 
  11   3   1    1.18    0.06 
  13   3   1    0.11    0.03 
  15   3   1    2.90    0.13 
  17   3   1   71.39    2.38 
  19   3   1   32.20    1.11 
  21   3   1    9.59    0.33 
  23   3   1    6.57    0.23 
 -22   4   1   12.03    0.41 
 -20   4   1   37.78    1.15 
 -18   4   1   17.32    0.55 
 -16   4   1    2.88    0.10 
 -14   4   1    5.62    0.22 
 -12   4   1   12.49    0.46 
 -10   4   1    4.17    0.17 
  -8   4   1    0.06    0.02 
  -6   4   1    3.17    0.10 
  -4   4   1    0.91    0.04 
  -2   4   1  320.03   11.94 
   0   4   1  449.24   16.65 
   2   4   1    4.78    0.20 
   4   4   1   36.51    1.37 
   6   4   1   25.35    1.00 
   8   4   1    1.37    0.10 
  10   4   1   35.43    0.92 
  12   4   1   14.30    0.53 
  14   4   1  104.06    3.46 
  16   4   1   45.13    1.46 
  20   4   1   10.38    0.38 
  22   4   1    1.41    0.07 
 -21   5   1    9.33    0.30 
 -19   5   1   16.62    0.51 
 -17   5   1   28.13    0.64 
 -15   5   1    0.68    0.07 
 -13   5   1    5.17    0.15 
 -11   5   1    2.19    0.08 
  -9   5   1    0.13    0.03 
  -7   5   1   11.48    0.41 
  -5   5   1    8.22    0.30 
  -3   5   1  114.40    2.92 
  -1   5   1    7.54    0.32 
  11   5   1    1.35    0.07 
  13   5   1    8.77    0.33 
  15   5   1    4.97    0.20 
  19   5   1   42.47    1.38 
  21   5   1    7.51    0.26 
 -20   6   1   14.88    0.45 
 -18   6   1    1.85    0.10 
 -16   6   1    1.13    0.06 
 -14   6   1    0.03    0.04 
 -12   6   1    3.18    0.10 
 -10   6   1    0.57    0.04 
  -8   6   1    0.02    0.03 
  -6   6   1    4.79    0.19 
  -4   6   1   35.01    1.22 
  -2   6   1   55.64    1.87 
 -17   7   1    0.82    0.06 
 -15   7   1    2.04    0.07 
 -13   7   1    2.17    0.11 
 -11   7   1    4.39    0.18 
  -7   7   1    0.10    0.03 
  -5   7   1   38.91    1.35 
  -3   7   1   16.00    0.57 
  -1   7   1   32.56    1.06 
 -12   8   1    7.63    0.18 
 -10   8   1    2.45    0.11 
  -8   8   1    0.64    0.06 
   0  -8   2   28.58    0.63 
   2  -8   2    5.08    0.14 
   4  -8   2    1.52    0.06 
   6  -8   2    0.11    0.02 
   8  -8   2    0.24    0.03 
  10  -8   2    0.01    0.02 
  -1  -7   2    5.52    0.15 
   1  -7   2    2.47    0.09 
   3  -7   2    1.96    0.08 
   5  -7   2    0.11    0.03 
   7  -7   2    1.21    0.06 
   9  -7   2   10.31    0.25 
  11  -7   2    0.73    0.05 
  13  -7   2    0.04    0.02 
 -20  -6   2    2.96    0.07 
 -18  -6   2   16.26    0.30 
 -16  -6   2    1.27    0.05 
 -14  -6   2    3.19    0.08 
 -12  -6   2   18.96    0.37 
  -2  -6   2   88.30    3.18 
   0  -6   2   10.81    0.44 
   2  -6   2   42.20    1.57 
   4  -6   2   17.83    0.46 
   6  -6   2    1.63    0.06 
   8  -6   2    0.09    0.02 
  10  -6   2    0.01    0.02 
  12  -6   2   11.70    0.28 
 -21  -5   2    2.39    0.06 
 -19  -5   2    7.95    0.16 
 -17  -5   2    5.70    0.11 
 -15  -5   2    0.51    0.03 
 -13  -5   2   28.92    0.45 
 -11  -5   2    0.89    0.05 
  -9  -5   2   33.65    1.17 
  -7  -5   2    0.53    0.04 
  -5  -5   2    1.56    0.10 
  -3  -5   2   98.45    3.52 
  -1  -5   2   16.96    0.65 
   1  -5   2    7.01    0.19 
   3  -5   2   12.86    0.32 
   5  -5   2    4.80    0.15 
   7  -5   2    2.11    0.14 
   9  -5   2    7.83    0.34 
  11  -5   2   19.68    0.47 
  13  -5   2    3.48    0.21 
  17  -5   2   41.17    1.30 
  19  -5   2    0.98    0.07 
 -24  -4   2    5.11    0.20 
 -22  -4   2    0.02    0.02 
 -20  -4   2    5.68    0.13 
 -18  -4   2   12.96    0.22 
 -16  -4   2    7.23    0.14 
 -14  -4   2  108.91    2.31 
 -12  -4   2    3.94    0.18 
 -10  -4   2    4.54    0.14 
  -8  -4   2    5.79    0.17 
  -6  -4   2   91.17    2.20 
  -4  -4   2   13.37    0.34 
  -2  -4   2    4.34    0.19 
   0  -4   2    8.66    0.22 
   2  -4   2    2.62    0.08 
   4  -4   2   22.29    0.53 
   6  -4   2   28.34    0.66 
   8  -4   2    0.58    0.08 
  10  -4   2    3.42    0.19 
  12  -4   2    3.20    0.19 
  14  -4   2    4.28    0.23 
  16  -4   2    5.52    0.18 
  18  -4   2    0.13    0.05 
  20  -4   2    0.03    0.04 
  22  -4   2    2.52    0.11 
 -25  -3   2    0.19    0.04 
 -23  -3   2    1.41    0.05 
 -21  -3   2    3.94    0.09 
 -19  -3   2   24.28    0.39 
 -17  -3   2   28.24    0.45 
 -15  -3   2    0.94    0.09 
 -13  -3   2  168.01    3.95 
 -11  -3   2   13.48    0.34 
  -9  -3   2   34.81    0.83 
  -7  -3   2   22.01    0.45 
  -5  -3   2    2.97    0.09 
  -3  -3   2  205.42    7.90 
   1  -3   2    0.57    0.03 
   3  -3   2   84.64    1.94 
   5  -3   2   15.36    0.38 
   7  -3   2   27.59    1.01 
   9  -3   2    0.64    0.07 
  11  -3   2   40.90    1.47 
  13  -3   2    8.89    0.39 
  15  -3   2   13.13    0.54 
  17  -3   2    5.51    0.17 
  19  -3   2   10.39    0.36 
  21  -3   2    5.40    0.21 
  23  -3   2    0.01    0.03 
 -24  -2   2    5.83    0.24 
 -22  -2   2    0.10    0.05 
 -20  -2   2    9.15    0.20 
 -18  -2   2    1.25    0.04 
 -16  -2   2   32.41    1.12 
 -14  -2   2   39.95    1.00 
 -12  -2   2    0.30    0.03 
 -10  -2   2  157.10    3.75 
  -8  -2   2   56.66    2.00 
  -6  -2   2  162.75    5.90 
  -4  -2   2   34.98    1.30 
  -2  -2   2  267.42    9.92 
   0  -2   2   59.92    2.30 
   4  -2   2    8.76    0.29 
   6  -2   2    4.71    0.21 
   8  -2   2    3.19    0.14 
  10  -2   2   40.98    1.47 
  12  -2   2   10.29    0.40 
  14  -2   2   52.28    1.87 
  16  -2   2   26.49    0.98 
  18  -2   2   44.70    1.05 
  20  -2   2    0.28    0.06 
  22  -2   2    0.05    0.04 
 -23  -1   2   17.96    0.59 
 -21  -1   2    3.79    0.18 
 -19  -1   2   26.20    0.91 
 -15  -1   2   28.15    0.71 
 -13  -1   2    5.12    0.15 
 -11  -1   2  172.65    6.17 
  -9  -1   2   45.47    1.63 
  -7  -1   2   37.82    1.37 
  -5  -1   2  172.72    6.31 
  -3  -1   2  472.19   17.52 
  -1  -1   2  285.32   10.37 
   3  -1   2  173.19    6.90 
   5  -1   2   67.75    2.56 
   9  -1   2   31.62    1.14 
  11  -1   2    0.18    0.04 
  13  -1   2   45.98    1.66 
  15  -1   2   11.55    0.46 
  17  -1   2   98.13    3.50 
  19  -1   2    0.54    0.05 
  21  -1   2   39.10    1.19 
  23  -1   2    6.70    0.24 
  25  -1   2    1.52    0.08 
 -14   0   2   22.34    0.86 
 -12   0   2   56.38    2.08 
 -10   0   2  534.75   19.69 
  -8   0   2   27.20    1.01 
  -6   0   2  125.92    4.62 
  -4   0   2   46.54    1.70 
   0   0   2   28.60    1.05 
   2   0   2  262.94    9.57 
  10   0   2   93.71    2.23 
  12   0   2   65.22    2.35 
  14   0   2   27.52    1.00 
  16   0   2   27.45    1.01 
  18   0   2   39.69    0.77 
  20   0   2    0.13    0.04 
  22   0   2    0.94    0.08 
  24   0   2    0.44    0.05 
 -11   1   2  165.12    6.17 
  -9   1   2   42.75    1.62 
  -7   1   2   36.91    0.97 
  -5   1   2  172.34    4.48 
  -3   1   2  483.70   12.41 
  -1   1   2  283.45    7.35 
   3   1   2  198.52    6.95 
   9   1   2   32.97    1.09 
  11   1   2    0.09    0.03 
  13   1   2   46.62    1.14 
  15   1   2   11.56    0.31 
  17   1   2   99.20    3.23 
  19   1   2    0.37    0.04 
  21   1   2   37.05    0.86 
  23   1   2    6.35    0.23 
  25   1   2    1.50    0.08 
 -22   2   2    0.12    0.04 
 -20   2   2    8.67    0.32 
 -10   2   2  161.38    5.70 
  -8   2   2   54.72    1.41 
  -6   2   2  160.30    4.17 
  -4   2   2   35.65    0.92 
  -2   2   2  273.00    7.03 
   0   2   2   62.93    1.63 
   2   2   2   15.37    0.41 
   4   2   2    8.80    0.35 
   8   2   2    2.52    0.10 
  10   2   2   40.34    1.39 
  12   2   2   10.15    0.36 
  14   2   2   52.76    1.77 
  16   2   2   25.46    0.63 
  18   2   2   43.32    1.00 
  20   2   2    0.22    0.03 
  22   2   2    0.09    0.02 
  24   2   2    2.68    0.11 
 -23   3   2    1.34    0.08 
 -21   3   2    3.98    0.17 
 -19   3   2   24.71    0.76 
 -11   3   2   12.78    0.34 
  -9   3   2   34.01    0.85 
  -7   3   2   22.94    0.56 
  -5   3   2    3.13    0.14 
  -3   3   2  219.99    5.61 
  -1   3   2   16.49    0.44 
   1   3   2    0.54    0.03 
   3   3   2   85.44    3.13 
   5   3   2   16.08    0.61 
   7   3   2   27.62    0.70 
   9   3   2    0.45    0.03 
  11   3   2   40.12    1.02 
  13   3   2    8.90    0.33 
  15   3   2   13.57    0.47 
  17   3   2    5.46    0.15 
  19   3   2    9.97    0.25 
  21   3   2    5.53    0.20 
  23   3   2    0.13    0.02 
 -24   4   2    5.06    0.18 
 -22   4   2    0.01    0.03 
 -20   4   2    5.67    0.22 
 -18   4   2   13.45    0.44 
 -16   4   2    7.12    0.19 
 -12   4   2    3.76    0.16 
  -8   4   2    6.43    0.18 
  -6   4   2   93.77    2.30 
  -4   4   2   13.30    0.35 
  -2   4   2    4.21    0.19 
   0   4   2    8.92    0.36 
   2   4   2    2.63    0.13 
   4   4   2   21.79    0.84 
   6   4   2   27.41    1.06 
   8   4   2    0.50    0.07 
  10   4   2    3.19    0.13 
  12   4   2    2.90    0.12 
  14   4   2    4.32    0.18 
  16   4   2    5.72    0.23 
  18   4   2    0.08    0.03 
  20   4   2    0.04    0.03 
  22   4   2    2.76    0.11 
 -23   5   2    1.03    0.06 
 -21   5   2    2.46    0.11 
 -19   5   2    8.09    0.28 
 -17   5   2    5.61    0.16 
 -15   5   2    0.58    0.07 
 -13   5   2   27.99    0.69 
 -11   5   2    0.84    0.07 
  -9   5   2   35.21    1.19 
  -7   5   2    0.37    0.04 
  -5   5   2    1.73    0.08 
  -3   5   2   99.96    2.49 
  11   5   2   18.90    0.66 
  13   5   2    3.51    0.15 
  15   5   2   12.60    0.46 
  19   5   2    0.92    0.06 
 -20   6   2    2.95    0.12 
 -18   6   2   17.66    0.52 
 -16   6   2    1.32    0.06 
 -14   6   2    3.58    0.15 
 -12   6   2   19.64    0.48 
 -10   6   2    0.05    0.03 
  -8   6   2    5.18    0.21 
  -6   6   2   13.51    0.49 
  -4   6   2    5.68    0.22 
  -2   6   2   90.54    3.03 
 -17   7   2    1.53    0.07 
 -15   7   2    8.80    0.20 
 -13   7   2    2.37    0.08 
 -11   7   2    3.41    0.16 
  -7   7   2    5.58    0.22 
  -5   7   2   13.55    0.48 
  -3   7   2    6.91    0.26 
  -1   7   2    5.87    0.21 
 -12   8   2    2.20    0.07 
 -10   8   2    0.79    0.04 
  -2  -8   3    0.54    0.06 
   0  -8   3    0.56    0.04 
   2  -8   3    9.59    0.23 
   4  -8   3    4.68    0.13 
   6  -8   3    2.07    0.07 
   8  -8   3    0.08    0.02 
  10  -8   3    0.54    0.03 
 -15  -7   3   20.63    0.67 
  -3  -7   3    7.07    0.19 
  -1  -7   3    2.22    0.08 
   1  -7   3   34.22    0.64 
   3  -7   3    9.87    0.21 
   5  -7   3    0.13    0.03 
   7  -7   3    0.14    0.03 
   9  -7   3    3.56    0.11 
  11  -7   3    0.10    0.02 
  13  -7   3   17.42    0.54 
 -20  -6   3    0.39    0.02 
 -18  -6   3    2.75    0.07 
 -16  -6   3    1.01    0.05 
 -14  -6   3    0.17    0.02 
 -12  -6   3    0.16    0.03 
 -10  -6   3   12.16    0.47 
  -8  -6   3    2.10    0.13 
  -6  -6   3    0.46    0.06 
  -4  -6   3   28.67    1.09 
  -2  -6   3   50.77    1.84 
   0  -6   3    0.78    0.08 
   2  -6   3    0.07    0.05 
   4  -6   3    0.09    0.02 
   6  -6   3    0.59    0.04 
   8  -6   3    0.02    0.02 
  10  -6   3    0.11    0.02 
  12  -6   3    1.45    0.09 
 -21  -5   3    0.04    0.02 
 -19  -5   3    4.84    0.11 
 -17  -5   3    0.10    0.02 
 -15  -5   3    1.09    0.05 
 -13  -5   3   49.44    0.75 
 -11  -5   3   13.96    0.29 
  -9  -5   3    0.13    0.03 
  -7  -5   3    4.93    0.15 
  -5  -5   3    0.20    0.05 
  -3  -5   3   33.18    1.18 
  -1  -5   3    0.05    0.04 
   1  -5   3    4.63    0.21 
   3  -5   3   49.33    1.75 
   5  -5   3   10.96    0.46 
   7  -5   3   19.64    0.76 
   9  -5   3   11.08    0.29 
  11  -5   3    0.09    0.05 
  13  -5   3   41.27    1.53 
 -24  -4   3    1.32    0.04 
 -22  -4   3    0.56    0.04 
 -20  -4   3    8.07    0.15 
 -18  -4   3    1.32    0.05 
 -16  -4   3    1.78    0.06 
 -14  -4   3    0.46    0.05 
 -12  -4   3    0.02    0.04 
 -10  -4   3   71.23    1.86 
  -8  -4   3    0.49    0.04 
  -6  -4   3   23.33    0.57 
  -4  -4   3    0.03    0.02 
  -2  -4   3  114.03    4.00 
   0  -4   3    9.45    0.24 
   2  -4   3    1.61    0.06 
   4  -4   3    0.11    0.04 
   6  -4   3    8.08    0.33 
   8  -4   3    0.38    0.07 
  10  -4   3   19.50    0.72 
  12  -4   3    1.71    0.14 
  14  -4   3    7.33    0.35 
  16  -4   3    0.48    0.05 
  18  -4   3   69.69    2.18 
  20  -4   3    0.45    0.05 
  22  -4   3    0.49    0.05 
 -23  -3   3    0.03    0.02 
 -21  -3   3    0.39    0.03 
 -19  -3   3    2.56    0.07 
 -17  -3   3    3.87    0.09 
 -15  -3   3   19.85    0.68 
 -13  -3   3   44.86    1.11 
 -11  -3   3   49.88    1.19 
  -9  -3   3   29.63    0.59 
  -7  -3   3    2.40    0.07 
  -5  -3   3    0.07    0.03 
  -3  -3   3    8.09    0.31 
  -1  -3   3   75.45    2.56 
   1  -3   3   12.40    0.30 
   3  -3   3    2.71    0.14 
   5  -3   3   86.08    3.01 
   7  -3   3   26.65    0.96 
   9  -3   3   11.19    0.44 
  11  -3   3    9.53    0.40 
  13  -3   3   11.65    0.50 
  15  -3   3   74.61    2.70 
  17  -3   3   52.52    1.24 
  19  -3   3   13.76    0.47 
  21  -3   3    0.11    0.04 
  23  -3   3    1.64    0.08 
 -24  -2   3    0.11    0.04 
 -22  -2   3    0.59    0.07 
 -20  -2   3    1.41    0.07 
 -18  -2   3    8.45    0.18 
 -16  -2   3    0.33    0.05 
 -14  -2   3   28.75    0.73 
 -12  -2   3   10.48    0.28 
 -10  -2   3   93.89    2.22 
  -8  -2   3    3.27    0.10 
  -6  -2   3   57.25    2.15 
  -4  -2   3   15.58    0.60 
  -2  -2   3    8.62    0.34 
   6  -2   3   61.16    2.16 
   8  -2   3    0.38    0.05 
  10  -2   3   35.90    1.29 
  12  -2   3   18.31    0.69 
  14  -2   3   14.66    0.59 
  16  -2   3    2.63    0.16 
  18  -2   3    0.04    0.03 
  20  -2   3    1.16    0.09 
  22  -2   3    4.32    0.17 
 -15  -1   3    1.50    0.07 
 -11  -1   3   33.59    1.23 
  -9  -1   3    6.24    0.25 
  -7  -1   3    0.10    0.02 
  -5  -1   3    5.36    0.22 
  -3  -1   3  200.59    7.39 
  -1  -1   3  206.94    7.66 
   1  -1   3  100.10    3.76 
   3  -1   3  120.08    4.81 
   9  -1   3    1.03    0.07 
  11  -1   3   18.05    0.68 
  13  -1   3   49.24    1.79 
  15  -1   3   20.54    0.77 
  17  -1   3   43.60    1.59 
  19  -1   3   19.74    0.49 
  21  -1   3    0.07    0.04 
  23  -1   3    1.19    0.08 
  25  -1   3    0.04    0.02 
 -16   0   3    0.01    0.03 
 -14   0   3    0.12    0.03 
 -12   0   3    0.07    0.03 
  -8   0   3    0.01    0.02 
  -6   0   3    0.02    0.02 
  -4   0   3    0.07    0.02 
  -2   0   3    0.01    0.02 
   0   0   3    0.07    0.02 
   2   0   3    0.01    0.01 
   4   0   3    0.00    0.01 
   6   0   3    1.35    0.06 
   8   0   3    0.01    0.02 
  10   0   3    0.01    0.01 
  12   0   3   -0.01    0.02 
  14   0   3   -0.02    0.03 
  18   0   3    0.12    0.05 
  20   0   3    0.02    0.04 
  22   0   3   -0.02    0.04 
  24   0   3    0.05    0.03 
 -21   1   3    0.09    0.04 
 -11   1   3   32.78    1.22 
  -9   1   3    5.90    0.25 
  -7   1   3    0.07    0.02 
  -5   1   3    5.57    0.22 
  -3   1   3  202.76    7.41 
  -1   1   3  211.68    7.68 
   1   1   3  103.62    3.80 
   3   1   3  137.11    4.87 
   5   1   3   40.99    1.47 
   7   1   3   19.67    0.73 
   9   1   3    1.09    0.04 
  11   1   3   18.69    0.48 
  13   1   3   49.11    1.70 
  15   1   3   19.89    0.72 
  17   1   3   44.59    1.45 
  19   1   3   19.28    0.46 
  21   1   3    0.03    0.04 
  23   1   3    1.03    0.08 
 -24   2   3    0.04    0.03 
 -22   2   3    0.63    0.07 
 -20   2   3    1.33    0.10 
  -8   2   3    3.30    0.10 
  -6   2   3   58.49    1.53 
  -4   2   3   16.31    0.43 
  -2   2   3    9.25    0.25 
   0   2   3    8.96    0.24 
   2   2   3  180.34    6.59 
   4   2   3   27.85    1.05 
   6   2   3   61.95    2.27 
   8   2   3    0.34    0.03 
  10   2   3   36.00    0.91 
  12   2   3   18.31    0.48 
  14   2   3   15.38    0.54 
  16   2   3    2.39    0.08 
  18   2   3    0.04    0.02 
  20   2   3    1.05    0.05 
  22   2   3    4.00    0.11 
  24   2   3    3.73    0.14 
 -25   3   3    5.68    0.20 
 -23   3   3    0.00    0.03 
 -21   3   3    0.39    0.06 
 -19   3   3    2.75    0.14 
 -11   3   3   47.65    1.22 
  -9   3   3   30.00    0.74 
  -7   3   3    2.49    0.08 
  -5   3   3    0.07    0.01 
  -3   3   3    7.88    0.22 
  -1   3   3   72.08    1.90 
   1   3   3   12.04    0.48 
   3   3   3    2.76    0.14 
   5   3   3   85.84    3.17 
   7   3   3   25.82    0.66 
   9   3   3   10.63    0.29 
  11   3   3    9.45    0.26 
  13   3   3   12.37    0.44 
  15   3   3   78.95    2.57 
  17   3   3   52.58    1.25 
  19   3   3   14.04    0.33 
  21   3   3    0.11    0.02 
 -24   4   3    1.26    0.07 
 -22   4   3    0.65    0.07 
 -20   4   3    8.39    0.29 
 -18   4   3    1.16    0.10 
 -16   4   3    1.54    0.07 
 -12   4   3    0.03    0.02 
 -10   4   3   74.55    2.39 
  -8   4   3    0.53    0.07 
  -6   4   3   22.96    0.59 
  -4   4   3    0.02    0.02 
  -2   4   3  109.06    2.83 
   0   4   3    9.78    0.39 
   2   4   3    1.63    0.10 
   4   4   3    0.15    0.04 
   6   4   3    7.71    0.34 
   8   4   3    0.35    0.03 
  10   4   3   17.92    0.63 
  12   4   3    1.81    0.09 
  14   4   3    7.59    0.28 
  16   4   3    0.45    0.06 
  18   4   3   70.68    2.34 
  20   4   3    0.54    0.05 
  22   4   3    0.50    0.04 
 -23   5   3    0.36    0.04 
 -21   5   3    0.05    0.03 
 -19   5   3    4.82    0.19 
 -17   5   3    0.18    0.03 
 -15   5   3    1.01    0.06 
 -13   5   3   46.68    1.15 
 -11   5   3   14.59    0.51 
  -9   5   3    0.12    0.03 
  -7   5   3    4.96    0.20 
  -5   5   3    0.20    0.03 
  -3   5   3   31.63    0.82 
   9   5   3   10.91    0.37 
  11   5   3    0.06    0.02 
  13   5   3   41.85    1.41 
  19   5   3   13.31    0.45 
 -20   6   3    0.42    0.05 
 -18   6   3    2.95    0.13 
 -16   6   3    1.02    0.06 
 -14   6   3    0.21    0.03 
 -12   6   3    0.11    0.03 
 -10   6   3   13.33    0.47 
  -8   6   3    2.46    0.11 
  -4   6   3   29.86    1.03 
  -2   6   3   51.44    1.74 
 -17   7   3    0.24    0.03 
 -15   7   3   20.70    0.46 
 -13   7   3    4.54    0.13 
 -11   7   3    0.07    0.04 
  -7   7   3    0.11    0.03 
  -5   7   3    4.15    0.17 
  -3   7   3    7.74    0.27 
  -1   7   3    2.30    0.10 
 -12   8   3    0.12    0.03 
 -10   8   3    1.13    0.07 
  -4  -8   4    2.90    0.12 
  -2  -8   4   33.23    0.73 
   0  -8   4    0.83    0.06 
   2  -8   4   32.58    0.71 
   4  -8   4    0.09    0.02 
   6  -8   4    8.23    0.19 
   8  -8   4    0.11    0.02 
 -15  -7   4    8.63    0.32 
 -13  -7   4    6.26    0.26 
 -11  -7   4   19.34    0.67 
  -5  -7   4    0.66    0.06 
  -3  -7   4    0.28    0.03 
  -1  -7   4   28.36    0.53 
   1  -7   4    2.55    0.08 
   3  -7   4    2.88    0.10 
   5  -7   4    1.18    0.06 
   7  -7   4   25.50    0.56 
   9  -7   4    1.10    0.05 
  11  -7   4    3.12    0.09 
 -20  -6   4    3.44    0.08 
 -18  -6   4    0.15    0.02 
 -16  -6   4    1.45    0.05 
 -14  -6   4    2.15    0.07 
 -12  -6   4   31.22    0.59 
 -10  -6   4    7.08    0.21 
  -8  -6   4   10.19    0.29 
  -6  -6   4    0.95    0.08 
  -4  -6   4   67.46    1.65 
  -2  -6   4   50.18    1.20 
   0  -6   4   16.18    0.42 
   2  -6   4    6.79    0.15 
   4  -6   4    0.58    0.04 
   6  -6   4   12.58    0.26 
   8  -6   4    0.14    0.03 
  10  -6   4   14.85    0.35 
 -23  -5   4    1.85    0.06 
 -21  -5   4    4.11    0.09 
 -19  -5   4    1.19    0.05 
 -17  -5   4   65.71    0.99 
 -15  -5   4    5.62    0.11 
 -13  -5   4   41.76    0.64 
 -11  -5   4   13.77    0.23 
  -9  -5   4    1.89    0.08 
  -7  -5   4    8.28    0.24 
  -5  -5   4    0.25    0.05 
  -3  -5   4    8.33    0.34 
  -1  -5   4   33.39    1.21 
   1  -5   4    0.20    0.05 
   3  -5   4   28.58    1.06 
   5  -5   4    0.05    0.05 
   7  -5   4   44.65    1.58 
   9  -5   4    8.61    0.23 
  11  -5   4    0.47    0.08 
  13  -5   4    0.75    0.09 
 -24  -4   4    0.32    0.03 
 -22  -4   4    1.04    0.05 
 -20  -4   4   17.91    0.30 
 -18  -4   4   53.50    0.82 
 -16  -4   4   56.73    0.85 
 -14  -4   4    3.41    0.10 
 -12  -4   4    0.14    0.05 
 -10  -4   4    0.02    0.02 
  -8  -4   4   12.23    0.31 
  -6  -4   4  101.07    2.40 
  -4  -4   4   90.17    2.10 
  -2  -4   4   35.12    1.23 
   0  -4   4   11.32    0.43 
   2  -4   4    1.34    0.10 
   4  -4   4   18.79    0.71 
   6  -4   4   17.34    0.64 
   8  -4   4   12.98    0.51 
  10  -4   4    0.04    0.05 
  12  -4   4    0.10    0.06 
  14  -4   4   67.27    2.48 
  18  -4   4    0.34    0.05 
  20  -4   4    0.44    0.05 
 -25  -3   4    0.85    0.07 
 -23  -3   4    2.89    0.08 
 -21  -3   4    8.21    0.15 
 -19  -3   4    0.72    0.04 
 -17  -3   4   87.84    1.33 
 -15  -3   4   14.28    0.52 
 -13  -3   4   10.99    0.30 
 -11  -3   4   10.39    0.27 
  -9  -3   4   20.93    0.43 
  -7  -3   4   22.64    0.47 
  -5  -3   4   22.25    0.45 
  -3  -3   4    4.89    0.20 
  -1  -3   4   68.07    2.32 
   1  -3   4   55.90    1.94 
   3  -3   4   10.64    0.40 
   5  -3   4   23.86    0.86 
   7  -3   4    0.38    0.06 
   9  -3   4   32.35    1.15 
  11  -3   4    0.60    0.08 
  13  -3   4    9.73    0.42 
  15  -3   4   95.45    2.27 
  17  -3   4   36.66    0.89 
  19  -3   4   16.89    0.57 
  21  -3   4    3.80    0.16 
 -24  -2   4    0.04    0.04 
 -22  -2   4    5.18    0.22 
 -20  -2   4   45.00    0.98 
 -18  -2   4   61.61    1.12 
 -16  -2   4   26.92    0.96 
 -14  -2   4   10.21    0.28 
 -12  -2   4    1.24    0.06 
 -10  -2   4   47.02    1.14 
  -8  -2   4    1.33    0.05 
  -6  -2   4  244.29    6.06 
  -4  -2   4   66.48    2.51 
  -2  -2   4  359.88   13.71 
   4  -2   4   36.24    1.32 
   6  -2   4    2.04    0.11 
   8  -2   4  189.08    6.70 
  10  -2   4   11.30    0.46 
  12  -2   4   15.30    0.62 
  14  -2   4   51.43    1.85 
  16  -2   4    2.27    0.10 
  18  -2   4    1.45    0.08 
  20  -2   4    1.56    0.10 
  22  -2   4    4.89    0.19 
 -15  -1   4    0.03    0.02 
 -13  -1   4   71.19    1.71 
 -11  -1   4  126.06    4.54 
  -9  -1   4  239.02    8.60 
  -7  -1   4    6.60    0.27 
  -5  -1   4   37.36    1.39 
  -3  -1   4   22.93    0.86 
   1  -1   4  117.19    4.46 
   3  -1   4   79.70    3.14 
   7  -1   4   67.07    2.40 
   9  -1   4   80.17    2.98 
  11  -1   4    9.80    0.39 
  13  -1   4   13.03    0.51 
  15  -1   4  167.59    5.67 
  17  -1   4   63.69    1.91 
  19  -1   4    9.46    0.33 
  21  -1   4   17.63    0.57 
  23  -1   4    0.05    0.03 
 -22   0   4   20.70    0.70 
 -16   0   4   11.21    0.48 
 -14   0   4   45.81    1.74 
 -12   0   4   16.10    0.63 
 -10   0   4  219.47    7.86 
  -8   0   4    0.52    0.05 
  -6   0   4  132.88    4.85 
  -4   0   4  162.49    5.97 
   0   0   4   17.85    0.67 
   2   0   4    2.59    0.11 
   4   0   4    6.65    0.26 
   6   0   4   11.54    0.45 
   8   0   4  320.39   12.24 
  16   0   4   11.12    0.39 
  18   0   4    1.73    0.11 
  20   0   4    0.14    0.05 
  22   0   4   16.05    0.52 
  24   0   4   13.66    0.43 
 -23   1   4   10.02    0.34 
 -21   1   4   13.35    0.46 
 -13   1   4   72.23    2.59 
 -11   1   4  127.71    4.54 
  -9   1   4  232.82    8.62 
  -7   1   4    6.70    0.27 
  -5   1   4   37.81    1.39 
  -3   1   4   23.22    0.86 
   1   1   4  127.58    4.48 
   3   1   4   89.44    3.16 
   5   1   4   48.33    1.76 
   7   1   4   70.79    1.71 
   9   1   4   87.27    2.12 
  11   1   4    9.59    0.27 
  13   1   4   12.68    0.46 
  15   1   4  161.28    5.25 
  17   1   4   62.32    1.39 
  19   1   4    8.83    0.23 
  21   1   4   17.86    0.57 
  23   1   4    0.04    0.03 
 -26   2   4    1.38    0.07 
 -24   2   4    0.05    0.03 
 -22   2   4    4.94    0.20 
 -20   2   4   43.89    1.34 
 -10   2   4   47.26    1.16 
  -8   2   4    1.21    0.08 
  -6   2   4  239.71    6.23 
  -4   2   4   69.32    1.78 
  -2   2   4  383.39    9.74 
   0   2   4   36.33    1.35 
   2   2   4    0.28    0.04 
   4   2   4   38.21    1.39 
   6   2   4    2.09    0.07 
   8   2   4  196.33    4.77 
  10   2   4   11.60    0.31 
  12   2   4   16.44    0.57 
  14   2   4   50.68    1.75 
  16   2   4    2.11    0.08 
  18   2   4    1.50    0.06 
  20   2   4    1.50    0.06 
  22   2   4    5.00    0.18 
 -25   3   4    0.85    0.06 
 -23   3   4    3.14    0.14 
 -21   3   4    8.80    0.30 
 -19   3   4    0.76    0.08 
 -11   3   4    9.40    0.36 
  -9   3   4   20.87    0.53 
  -7   3   4   22.39    0.58 
  -5   3   4   21.31    0.46 
  -3   3   4    4.57    0.11 
  -1   3   4   65.23    1.72 
   1   3   4   54.55    2.04 
   3   3   4    9.87    0.26 
   5   3   4   23.51    0.60 
   7   3   4    0.39    0.03 
   9   3   4   31.28    0.80 
  13   3   4   10.26    0.36 
  15   3   4  100.28    2.32 
  17   3   4   36.95    0.89 
  19   3   4   17.70    0.41 
  21   3   4    3.93    0.11 
 -24   4   4    0.38    0.04 
 -22   4   4    1.07    0.08 
 -20   4   4   19.13    0.58 
 -18   4   4   54.43    1.60 
 -16   4   4   55.17    1.23 
 -14   4   4    3.47    0.17 
 -12   4   4    0.03    0.02 
 -10   4   4    0.03    0.02 
  -8   4   4   11.70    0.32 
  -6   4   4   98.88    3.39 
  -4   4   4   84.10    2.20 
  -2   4   4   33.75    0.86 
   0   4   4   10.98    0.29 
   2   4   4    1.34    0.09 
   4   4   4   18.92    0.48 
   6   4   4   16.23    0.43 
   8   4   4   12.35    0.44 
  10   4   4    0.08    0.02 
  12   4   4    0.17    0.03 
  14   4   4   72.34    2.35 
  16   4   4    9.34    0.24 
  18   4   4    0.35    0.04 
  20   4   4    0.47    0.03 
 -23   5   4    2.01    0.08 
 -21   5   4    4.28    0.16 
 -19   5   4    1.37    0.09 
 -17   5   4   63.40    1.42 
 -15   5   4    5.50    0.16 
 -13   5   4   40.00    0.98 
 -11   5   4   13.78    0.35 
  -9   5   4    1.89    0.10 
  -7   5   4    9.57    0.32 
  -5   5   4    0.15    0.03 
  -3   5   4    7.67    0.29 
  -1   5   4   33.92    1.12 
   7   5   4   42.37    1.46 
   9   5   4    8.50    0.30 
  11   5   4    0.53    0.05 
  13   5   4    0.78    0.06 
  17   5   4   52.32    1.77 
  19   5   4   12.50    0.41 
 -20   6   4    3.69    0.13 
 -18   6   4    0.18    0.04 
 -16   6   4    1.52    0.06 
 -14   6   4    2.24    0.08 
 -12   6   4   32.75    0.78 
 -10   6   4    7.38    0.28 
  -8   6   4   11.17    0.40 
  -6   6   4    0.97    0.06 
  -4   6   4   70.91    2.35 
  -2   6   4   49.98    1.70 
   0   6   4   16.33    0.56 
  10   6   4   14.48    0.52 
 -17   7   4    6.94    0.23 
 -15   7   4    9.16    0.22 
 -13   7   4    7.00    0.18 
 -11   7   4   18.93    0.68 
  -7   7   4    3.80    0.16 
  -5   7   4    0.85    0.06 
  -3   7   4    0.30    0.04 
  -1   7   4   27.55    0.95 
 -10   8   4    9.33    0.33 
  -8   8   4    0.68    0.06 
  -4  -8   5    2.38    0.11 
  -2  -8   5   11.48    0.27 
   0  -8   5    7.75    0.19 
   2  -8   5    4.59    0.12 
   4  -8   5    7.27    0.18 
   6  -8   5    0.75    0.04 
 -15  -7   5    0.93    0.07 
 -13  -7   5    1.83    0.11 
 -11  -7   5    0.90    0.08 
  -9  -7   5    2.25    0.12 
  -5  -7   5    1.12    0.07 
  -3  -7   5    0.21    0.03 
  -1  -7   5   23.31    0.51 
   1  -7   5   37.06    0.79 
   3  -7   5   16.08    0.36 
   5  -7   5   21.92    0.48 
   7  -7   5    7.09    0.18 
   9  -7   5   27.50    0.63 
 -20  -6   5   65.41    1.12 
 -18  -6   5   52.31    0.89 
 -16  -6   5    2.83    0.08 
 -14  -6   5   29.13    0.50 
 -12  -6   5   42.33    0.77 
 -10  -6   5   15.30    0.39 
  -8  -6   5   10.63    0.29 
  -6  -6   5    0.29    0.03 
  -4  -6   5   25.91    0.44 
  -2  -6   5    0.88    0.04 
   0  -6   5   40.09    0.75 
   2  -6   5    1.05    0.05 
   4  -6   5   20.02    0.39 
   6  -6   5    0.17    0.03 
   8  -6   5   22.03    0.43 
 -21  -5   5    2.87    0.07 
 -19  -5   5    0.84    0.05 
 -17  -5   5    8.33    0.15 
 -15  -5   5    0.95    0.04 
 -13  -5   5    1.88    0.06 
 -11  -5   5    0.18    0.03 
  -9  -5   5   18.45    0.47 
  -7  -5   5    8.78    0.25 
  -5  -5   5   10.69    0.29 
  -3  -5   5   12.40    0.48 
  -1  -5   5   10.84    0.45 
   1  -5   5   80.80    2.85 
   3  -5   5   23.81    0.91 
   5  -5   5   17.31    0.66 
   7  -5   5   46.47    0.87 
   9  -5   5   14.58    0.58 
  11  -5   5   14.11    0.58 
 -24  -4   5    0.41    0.03 
 -22  -4   5    5.56    0.12 
 -20  -4   5   75.15    1.28 
 -18  -4   5   99.27    1.49 
 -16  -4   5    0.06    0.02 
 -14  -4   5    8.75    0.16 
 -12  -4   5  106.26    3.24 
 -10  -4   5   35.39    0.84 
  -8  -4   5    6.96    0.20 
  -6  -4   5    1.53    0.07 
  -4  -4   5   54.03    1.29 
  -2  -4   5   13.77    0.36 
   0  -4   5   71.33    2.41 
   2  -4   5    4.16    0.20 
   4  -4   5   56.08    1.92 
   6  -4   5    2.14    0.14 
   8  -4   5   64.02    2.26 
  10  -4   5   15.38    0.63 
  12  -4   5    2.07    0.15 
  14  -4   5   10.23    0.47 
 -25  -3   5    0.77    0.06 
 -23  -3   5    3.37    0.09 
 -21  -3   5   28.07    0.45 
 -19  -3   5   11.38    0.20 
 -17  -3   5    4.05    0.09 
 -15  -3   5   26.75    0.92 
 -13  -3   5    9.95    0.28 
 -11  -3   5   14.26    0.37 
  -9  -3   5   62.70    1.25 
  -7  -3   5    1.45    0.05 
  -5  -3   5   59.65    1.38 
  -3  -3   5   51.41    1.18 
  -1  -3   5  290.48    6.60 
   1  -3   5    0.53    0.06 
   3  -3   5    6.44    0.27 
   5  -3   5  100.10    3.47 
   7  -3   5  109.42    3.81 
   9  -3   5   12.29    0.52 
  11  -3   5    4.26    0.23 
  13  -3   5    3.70    0.21 
  15  -3   5   15.89    0.64 
  17  -3   5    1.00    0.09 
  19  -3   5    7.02    0.26 
  21  -3   5    0.12    0.03 
 -22  -2   5    7.00    0.19 
 -20  -2   5    6.62    0.18 
 -18  -2   5   31.37    0.49 
 -16  -2   5   47.97    1.56 
 -14  -2   5    5.11    0.16 
 -12  -2   5   10.48    0.29 
 -10  -2   5   63.40    1.50 
  -8  -2   5    7.78    0.17 
  -6  -2   5   35.23    0.91 
  -4  -2   5    1.13    0.05 
   2  -2   5    6.16    0.26 
   4  -2   5    9.74    0.38 
   6  -2   5   28.32    1.05 
   8  -2   5   71.87    2.62 
  10  -2   5    8.73    0.36 
  12  -2   5    0.34    0.07 
  14  -2   5   35.58    1.27 
  16  -2   5   26.81    0.88 
  18  -2   5    0.25    0.05 
  20  -2   5    3.61    0.15 
  22  -2   5    1.34    0.08 
 -21  -1   5   11.73    0.43 
 -15  -1   5   35.68    1.36 
 -13  -1   5    7.79    0.21 
 -11  -1   5   57.48    1.38 
  -9  -1   5    5.20    0.22 
  -7  -1   5    0.32    0.04 
  -5  -1   5  153.86    5.57 
  -3  -1   5   17.00    0.64 
  -1  -1   5  536.21   19.85 
   1  -1   5   68.12    2.59 
   7  -1   5   34.23    1.22 
   9  -1   5   13.18    0.50 
  17  -1   5    2.15    0.12 
  19  -1   5   12.20    0.41 
  21  -1   5    1.76    0.10 
  23  -1   5    2.31    0.10 
 -24   0   5    0.07    0.03 
 -22   0   5    0.10    0.04 
 -20   0   5    0.02    0.04 
 -16   0   5    0.03    0.03 
 -14   0   5    0.01    0.03 
 -12   0   5    0.00    0.03 
 -10   0   5    0.03    0.03 
  -8   0   5    0.03    0.03 
  -6   0   5    0.32    0.04 
  -4   0   5    0.02    0.02 
  -2   0   5    0.04    0.02 
   0   0   5    0.02    0.02 
   2   0   5    0.01    0.02 
   4   0   5    0.01    0.02 
   6   0   5    0.01    0.02 
  16   0   5    0.05    0.04 
  18   0   5    0.02    0.04 
  20   0   5    0.03    0.04 
  22   0   5    0.00    0.03 
 -25   1   5    0.25    0.04 
 -23   1   5    0.40    0.05 
 -21   1   5   12.71    0.43 
 -15   1   5   36.45    1.36 
 -13   1   5    7.75    0.32 
 -11   1   5   56.70    2.09 
  -9   1   5    5.23    0.22 
  -7   1   5    0.27    0.04 
  -5   1   5  150.42    5.58 
  -3   1   5   16.98    0.65 
  -1   1   5  549.48   19.90 
   1   1   5   73.26    2.60 
   3   1   5   47.34    1.75 
   5   1   5   68.23    1.65 
   7   1   5   35.12    0.86 
   9   1   5   12.45    0.34 
  11   1   5   17.70    0.64 
  15   1   5   37.20    1.23 
  17   1   5    2.10    0.08 
  19   1   5   11.60    0.29 
  21   1   5    1.73    0.10 
  23   1   5    2.33    0.10 
 -26   2   5    9.14    0.30 
 -24   2   5    0.66    0.07 
 -22   2   5    6.74    0.25 
 -20   2   5    6.60    0.25 
 -12   2   5   10.94    0.43 
 -10   2   5   59.36    1.53 
  -8   2   5    7.64    0.21 
  -6   2   5   35.41    1.33 
  -4   2   5    1.22    0.08 
  -2   2   5   60.95    2.25 
   0   2   5  121.56    4.46 
   2   2   5    6.46    0.17 
   4   2   5    9.90    0.26 
   6   2   5   29.79    0.74 
   8   2   5   76.17    1.86 
  10   2   5    8.48    0.24 
  12   2   5    0.11    0.03 
  14   2   5   32.94    0.82 
  16   2   5   27.81    0.93 
  18   2   5    0.22    0.03 
  20   2   5    3.56    0.10 
  22   2   5    1.40    0.08 
 -25   3   5    0.77    0.06 
 -23   3   5    3.74    0.15 
 -21   3   5   30.01    0.88 
 -19   3   5   12.03    0.40 
 -11   3   5   13.06    0.49 
  -9   3   5   64.39    2.09 
  -7   3   5    1.32    0.09 
  -5   3   5   56.49    1.19 
  -3   3   5   48.64    1.02 
  -1   3   5  276.01    6.94 
   1   3   5    0.51    0.03 
   3   3   5    6.36    0.18 
   5   3   5   99.17    2.46 
   7   3   5  108.43    2.70 
   9   3   5   13.35    0.46 
  11   3   5    4.60    0.18 
  13   3   5    3.90    0.17 
  15   3   5   15.70    0.40 
  17   3   5    1.19    0.07 
  19   3   5    7.49    0.19 
  21   3   5    0.13    0.02 
 -24   4   5    0.52    0.05 
 -22   4   5    5.87    0.21 
 -20   4   5   77.84    2.21 
 -18   4   5   98.75    2.90 
 -16   4   5    0.07    0.03 
 -14   4   5    8.97    0.33 
 -12   4   5   91.87    3.34 
 -10   4   5   34.12    1.17 
  -8   4   5    6.94    0.26 
  -6   4   5    1.34    0.06 
  -4   4   5   52.24    1.80 
  -2   4   5   13.69    0.36 
   0   4   5   67.16    1.70 
   2   4   5    4.02    0.12 
   4   4   5   53.37    1.35 
   6   4   5    2.17    0.10 
   8   4   5   63.90    2.13 
  10   4   5   15.87    0.55 
  12   4   5    2.20    0.11 
  14   4   5   11.21    0.41 
  16   4   5    1.98    0.09 
  18   4   5    2.75    0.08 
  20   4   5    7.70    0.18 
 -23   5   5    0.92    0.06 
 -21   5   5    3.03    0.13 
 -19   5   5    0.87    0.08 
 -17   5   5    7.89    0.21 
 -15   5   5    0.95    0.06 
 -13   5   5    1.81    0.06 
 -11   5   5    0.10    0.03 
  -9   5   5   18.42    0.64 
  -7   5   5    8.95    0.33 
  -5   5   5   10.36    0.38 
  -3   5   5   11.80    0.43 
  -1   5   5   10.47    0.39 
   1   5   5   78.45    2.70 
   3   5   5   24.17    0.83 
   5   5   5   16.62    0.58 
   7   5   5   47.32    1.56 
   9   5   5   13.95    0.49 
  11   5   5   14.81    0.51 
  17   5   5    0.01    0.02 
 -20   6   5   67.60    1.94 
 -18   6   5   50.49    1.54 
 -16   6   5    2.90    0.09 
 -14   6   5   30.38    0.68 
 -12   6   5   43.05    1.42 
 -10   6   5   16.10    0.39 
  -8   6   5   11.27    0.40 
  -6   6   5    0.24    0.04 
  -4   6   5   28.43    0.91 
  -2   6   5    0.95    0.06 
   0   6   5   39.04    1.35 
   2   6   5    1.01    0.06 
   4   6   5   19.81    0.68 
   6   6   5    0.18    0.03 
   8   6   5   21.32    0.74 
 -17   7   5    1.30    0.06 
 -15   7   5    0.87    0.04 
 -13   7   5    2.11    0.10 
 -11   7   5    0.81    0.07 
  -9   7   5    2.13    0.13 
  -5   7   5    1.16    0.07 
  -3   7   5    0.10    0.03 
  -1   7   5   22.42    0.78 
 -12   8   5    1.15    0.06 
 -10   8   5    6.17    0.22 
  -8   8   5   24.03    0.82 
  -6  -8   6    4.59    0.16 
  -4  -8   6   19.97    0.45 
  -2  -8   6    0.30    0.03 
   0  -8   6    0.04    0.02 
   2  -8   6    3.39    0.09 
   4  -8   6    3.39    0.09 
   6  -8   6    0.09    0.02 
 -15  -7   6    2.54    0.12 
 -13  -7   6    3.74    0.17 
 -11  -7   6    6.52    0.26 
  -9  -7   6    2.62    0.14 
  -7  -7   6    2.07    0.08 
  -5  -7   6    2.77    0.09 
  -3  -7   6   29.86    0.66 
  -1  -7   6    5.91    0.16 
   1  -7   6   24.16    0.53 
   3  -7   6    5.24    0.14 
   5  -7   6    0.05    0.02 
   7  -7   6    0.29    0.03 
   9  -7   6   17.96    0.40 
 -20  -6   6    4.11    0.09 
 -18  -6   6    9.34    0.18 
 -16  -6   6   37.04    0.65 
 -14  -6   6    8.29    0.18 
 -12  -6   6    0.44    0.04 
 -10  -6   6    1.24    0.07 
  -8  -6   6   29.64    0.58 
  -6  -6   6   10.07    0.19 
  -4  -6   6   10.74    0.20 
  -2  -6   6   12.41    0.22 
   0  -6   6    6.34    0.15 
   2  -6   6    7.51    0.17 
   4  -6   6   21.30    0.42 
   6  -6   6    0.51    0.04 
   8  -6   6    0.37    0.04 
 -21  -5   6    0.55    0.03 
 -19  -5   6   13.90    0.26 
 -17  -5   6    1.30    0.05 
 -15  -5   6   49.19    0.75 
 -13  -5   6   14.47    0.25 
 -11  -5   6    3.66    0.09 
  -9  -5   6   14.70    0.26 
  -7  -5   6    8.24    0.24 
  -5  -5   6   10.70    0.30 
  -3  -5   6   56.66    2.03 
  -1  -5   6    8.47    0.36 
   1  -5   6   75.33    2.68 
   3  -5   6    2.64    0.16 
   5  -5   6   17.21    0.35 
   7  -5   6    3.32    0.12 
   9  -5   6   61.53    2.28 
 -24  -4   6    1.41    0.04 
 -22  -4   6   24.32    0.44 
 -20  -4   6    9.31    0.19 
 -18  -4   6   89.64    1.19 
 -16  -4   6  109.64    1.50 
 -14  -4   6    4.16    0.09 
 -12  -4   6   31.16    1.03 
 -10  -4   6   21.45    0.54 
  -8  -4   6   87.36    2.03 
  -6  -4   6   69.44    1.62 
  -4  -4   6    0.17    0.03 
  -2  -4   6    0.07    0.02 
   2  -4   6   19.21    0.72 
   4  -4   6    0.21    0.06 
   6  -4   6    0.60    0.08 
   8  -4   6    0.97    0.10 
  10  -4   6    0.40    0.08 
  12  -4   6   13.40    0.58 
 -25  -3   6   14.34    0.45 
 -23  -3   6    0.92    0.04 
 -21  -3   6   11.20    0.20 
 -19  -3   6    0.70    0.04 
 -17  -3   6   28.27    0.45 
 -15  -3   6  116.51    3.86 
 -13  -3   6    7.85    0.32 
 -11  -3   6   28.81    0.72 
  -9  -3   6    6.27    0.15 
  -7  -3   6   99.98    2.32 
  -5  -3   6   47.95    1.15 
  -3  -3   6    0.93    0.05 
  -1  -3   6    7.88    0.21 
   1  -3   6  123.03    4.39 
   3  -3   6   49.17    1.78 
   5  -3   6   95.10    3.46 
   7  -3   6   38.18    1.47 
   9  -3   6   72.63    2.69 
  11  -3   6  126.85    4.42 
  13  -3   6   73.62    2.61 
 -22  -2   6   36.60    0.80 
 -20  -2   6   91.82    1.94 
 -18  -2   6  167.04    2.83 
 -16  -2   6   88.10    2.88 
 -14  -2   6   34.80    0.89 
 -12  -2   6  144.58    3.55 
 -10  -2   6   42.28    1.05 
  -8  -2   6  213.30    4.11 
  -6  -2   6  130.31    2.60 
  -4  -2   6  128.21    3.32 
  -2  -2   6   30.94    1.13 
   0  -2   6   92.89    2.95 
   2  -2   6   51.15    1.88 
   4  -2   6   33.98    1.30 
   6  -2   6   16.02    0.62 
   8  -2   6   17.65    0.67 
  16  -2   6    5.66    0.23 
  18  -2   6    0.37    0.05 
  20  -2   6   18.01    0.59 
 -25  -1   6    6.36    0.23 
 -23  -1   6    7.02    0.26 
 -21  -1   6    9.80    0.35 
 -15  -1   6   61.38    2.33 
 -13  -1   6   40.58    0.97 
 -11  -1   6   86.41    2.04 
  -9  -1   6    0.82    0.05 
  -7  -1   6  215.34    5.27 
  -5  -1   6  165.16    5.89 
  -3  -1   6   83.12    3.06 
  -1  -1   6   66.66    2.47 
  15  -1   6  143.20    4.42 
  17  -1   6    0.10    0.04 
  19  -1   6   15.13    0.50 
  21  -1   6   32.35    1.01 
 -26   0   6    6.67    0.23 
 -24   0   6    8.45    0.29 
 -22   0   6   50.22    1.53 
 -20   0   6  227.07    6.68 
 -14   0   6  124.03    4.62 
 -12   0   6  167.39    6.09 
 -10   0   6  111.61    4.00 
  -8   0   6  246.93    9.06 
  -6   0   6  162.14    5.86 
  -4   0   6  419.82   15.13 
  -2   0   6    5.46    0.23 
   0   0   6   36.80    1.37 
   2   0   6   94.09    3.45 
   4   0   6   30.45    1.14 
  14   0   6    0.17    0.03 
  16   0   6   26.14    0.83 
  18   0   6    0.17    0.05 
  20   0   6   12.42    0.41 
  22   0   6    0.04    0.03 
 -27   1   6    1.62    0.08 
 -25   1   6    6.70    0.23 
 -23   1   6    7.58    0.27 
 -21   1   6    9.82    0.35 
 -15   1   6   62.32    2.34 
 -13   1   6   39.55    1.46 
 -11   1   6   83.78    3.09 
  -9   1   6    0.83    0.07 
  -7   1   6  214.25    7.71 
  -5   1   6  164.54    5.92 
  -3   1   6   86.81    3.07 
  -1   1   6   69.62    2.48 
   1   1   6  148.58    5.44 
   3   1   6   50.49    1.24 
   5   1   6  328.00    8.03 
   7   1   6  153.49    3.82 
   9   1   6   92.12    3.19 
  13   1   6  141.57    4.57 
  15   1   6  149.09    4.78 
  17   1   6    0.07    0.02 
  19   1   6   15.45    0.50 
  21   1   6   33.61    1.01 
 -26   2   6    5.60    0.20 
 -24   2   6    1.24    0.08 
 -22   2   6   38.28    1.14 
 -20   2   6   92.61    2.74 
 -12   2   6  147.03    5.38 
 -10   2   6   41.83    1.59 
  -8   2   6  199.71    5.13 
  -6   2   6  132.12    3.25 
  -4   2   6  134.27    3.26 
  -2   2   6   32.51    0.80 
   0   2   6   83.92    2.09 
   2   2   6   55.67    1.33 
   4   2   6   37.70    0.92 
   6   2   6   16.78    0.43 
   8   2   6   17.33    0.46 
  10   2   6    0.46    0.05 
  12   2   6   21.49    0.53 
  14   2   6   11.61    0.31 
  16   2   6    6.15    0.22 
  18   2   6    0.40    0.04 
  20   2   6   19.88    0.59 
  22   2   6    0.06    0.02 
 -25   3   6   15.19    0.46 
 -23   3   6    0.87    0.08 
 -21   3   6   11.71    0.39 
 -19   3   6    0.82    0.08 
 -11   3   6   26.59    0.97 
  -9   3   6    6.52    0.18 
  -7   3   6   98.43    2.43 
  -5   3   6   48.92    1.20 
  -3   3   6    0.89    0.04 
  -1   3   6    7.80    0.21 
   1   3   6  127.70    3.12 
   3   3   6   51.78    1.26 
   5   3   6  102.26    2.46 
   7   3   6   42.44    1.04 
   9   3   6   77.43    2.55 
  11   3   6  130.84    4.22 
  13   3   6   72.98    1.72 
  15   3   6   25.97    0.64 
  17   3   6   14.94    0.49 
  19   3   6   33.79    0.73 
 -24   4   6    1.38    0.08 
 -22   4   6   25.33    0.76 
 -20   4   6    9.24    0.32 
 -18   4   6   86.18    2.61 
 -16   4   6  110.99    2.40 
 -14   4   6    4.15    0.18 
 -12   4   6   27.91    1.04 
 -10   4   6   20.03    0.73 
  -8   4   6   85.05    2.86 
  -6   4   6   69.12    2.28 
  -4   4   6    0.19    0.02 
  -2   4   6    0.01    0.01 
   0   4   6    0.06    0.02 
   2   4   6   18.50    0.49 
   4   4   6    0.15    0.03 
   6   4   6    0.65    0.05 
   8   4   6    1.05    0.06 
  10   4   6    0.33    0.04 
  12   4   6   14.51    0.51 
  14   4   6    4.92    0.14 
  16   4   6    2.64    0.12 
  18   4   6    2.34    0.07 
 -23   5   6    8.57    0.27 
 -21   5   6    0.55    0.06 
 -19   5   6   13.45    0.44 
 -17   5   6    1.17    0.06 
 -15   5   6   48.55    1.07 
 -13   5   6   14.52    0.51 
 -11   5   6    3.65    0.12 
  -9   5   6   14.69    0.52 
  -7   5   6    8.56    0.32 
  -5   5   6   11.90    0.40 
  -3   5   6   57.08    1.92 
  -1   5   6    8.00    0.30 
   1   5   6   74.42    2.55 
   3   5   6    2.59    0.11 
   5   5   6   17.51    0.60 
   7   5   6    3.39    0.14 
   9   5   6   64.94    2.14 
  11   5   6   65.85    2.23 
  15   5   6   22.90    0.79 
  17   5   6   20.86    0.46 
 -20   6   6    4.22    0.15 
 -18   6   6    9.09    0.22 
 -16   6   6   37.95    0.83 
 -14   6   6    9.00    0.32 
 -12   6   6    0.39    0.04 
 -10   6   6    1.22    0.06 
  -8   6   6   31.34    1.05 
  -6   6   6   10.82    0.38 
  -4   6   6   11.62    0.40 
  -2   6   6   12.75    0.44 
   0   6   6    6.01    0.23 
   2   6   6    6.80    0.27 
   4   6   6   20.51    0.73 
   6   6   6    0.49    0.04 
 -13   7   6    4.25    0.17 
 -11   7   6    6.52    0.26 
  -9   7   6    2.94    0.14 
 -10   8   6    0.27    0.03 
  -8   8   6    7.36    0.27 
  -6  -8   7    8.69    0.28 
  -4  -8   7    1.64    0.06 
  -2  -8   7    1.21    0.05 
   0  -8   7    1.69    0.06 
   2  -8   7    1.86    0.06 
   4  -8   7    0.72    0.03 
 -15  -7   7    2.69    0.12 
 -13  -7   7    0.14    0.04 
 -11  -7   7    3.70    0.16 
  -9  -7   7   23.30    0.53 
  -7  -7   7    2.72    0.09 
  -5  -7   7    0.17    0.02 
  -3  -7   7    1.02    0.05 
  -1  -7   7    5.23    0.14 
   1  -7   7    2.53    0.08 
   3  -7   7    0.31    0.03 
   5  -7   7   15.29    0.35 
   7  -7   7    5.29    0.14 
 -18  -6   7   36.55    0.62 
 -16  -6   7   11.91    0.23 
 -14  -6   7    3.48    0.11 
 -12  -6   7    4.28    0.11 
 -10  -6   7    1.29    0.05 
  -8  -6   7   21.82    0.43 
  -6  -6   7   22.41    0.37 
  -4  -6   7    1.34    0.05 
  -2  -6   7   17.88    0.31 
   0  -6   7    0.56    0.03 
   2  -6   7    5.08    0.12 
   4  -6   7    0.46    0.03 
   6  -6   7    1.15    0.06 
   8  -6   7    6.74    0.26 
 -21  -5   7    0.60    0.04 
 -19  -5   7   22.21    0.39 
 -17  -5   7    0.70    0.05 
 -15  -5   7   13.43    0.23 
 -13  -5   7    6.74    0.13 
 -11  -5   7   11.52    0.20 
  -9  -5   7   14.57    0.23 
  -7  -5   7   33.05    0.66 
  -5  -5   7   11.49    0.26 
  -3  -5   7  115.48    2.75 
  -1  -5   7    1.85    0.09 
   1  -5   7   20.34    0.42 
   3  -5   7   14.88    0.30 
   5  -5   7   28.60    0.55 
   7  -5   7    7.20    0.34 
 -24  -4   7    1.23    0.07 
 -22  -4   7    8.24    0.16 
 -20  -4   7    7.98    0.16 
 -18  -4   7   14.04    0.21 
 -16  -4   7   22.50    0.33 
 -14  -4   7    8.24    0.16 
 -12  -4   7    0.75    0.05 
 -10  -4   7   15.24    0.40 
  -8  -4   7    7.67    0.22 
  -6  -4   7   34.86    0.85 
  -4  -4   7   13.38    0.36 
  -2  -4   7    1.53    0.11 
   0  -4   7    2.10    0.13 
   2  -4   7    0.10    0.04 
   4  -4   7    0.72    0.08 
   6  -4   7    2.27    0.15 
   8  -4   7    1.17    0.11 
  10  -4   7    6.04    0.29 
 -25  -3   7    0.15    0.03 
 -23  -3   7    5.23    0.11 
 -21  -3   7    0.09    0.02 
 -19  -3   7    2.89    0.07 
 -17  -3   7    1.16    0.04 
 -15  -3   7   12.81    0.23 
 -13  -3   7    9.65    0.37 
 -11  -3   7   36.88    0.94 
  -9  -3   7    1.98    0.08 
  -7  -3   7   22.94    0.57 
  -5  -3   7    0.04    0.02 
  -3  -3   7   30.29    0.74 
  -1  -3   7    0.96    0.08 
   1  -3   7   21.98    0.84 
   3  -3   7    0.09    0.04 
   5  -3   7    3.79    0.20 
   7  -3   7   10.49    0.45 
   9  -3   7    1.24    0.11 
 -24  -2   7    7.09    0.25 
 -22  -2   7   16.23    0.38 
 -20  -2   7   35.98    0.78 
 -18  -2   7   26.49    0.49 
 -16  -2   7    5.45    0.24 
 -14  -2   7   30.87    1.06 
 -12  -2   7    8.27    0.23 
 -10  -2   7    6.12    0.18 
  -8  -2   7    4.00    0.10 
  -6  -2   7   18.40    0.39 
  -4  -2   7  296.38    7.05 
  -2  -2   7   92.80    3.40 
   0  -2   7   67.13    2.51 
   2  -2   7  124.84    4.54 
   4  -2   7    0.25    0.05 
  18  -2   7   18.36    0.60 
 -25  -1   7    0.29    0.04 
 -23  -1   7    0.21    0.04 
 -21  -1   7    0.71    0.07 
 -19  -1   7   15.98    0.53 
 -13  -1   7   34.42    0.83 
 -11  -1   7   12.31    0.31 
  -9  -1   7    1.20    0.06 
  -7  -1   7    1.56    0.05 
  -5  -1   7    9.92    0.26 
  -3  -1   7   17.33    0.68 
  -1  -1   7    0.24    0.04 
  15  -1   7   -0.05    0.04 
  17  -1   7    6.30    0.24 
  19  -1   7   -0.01    0.03 
  21  -1   7    0.28    0.04 
 -26   0   7    0.01    0.02 
 -24   0   7    0.02    0.03 
 -22   0   7    0.01    0.03 
 -20   0   7    0.02    0.04 
 -14   0   7    0.11    0.04 
 -12   0   7    0.10    0.04 
 -10   0   7    0.02    0.03 
  -8   0   7    0.02    0.03 
  -6   0   7    0.09    0.03 
  -4   0   7    0.00    0.02 
  -2   0   7    0.01    0.02 
   0   0   7    0.01    0.02 
   2   0   7    0.04    0.03 
  12   0   7   -0.02    0.02 
  14   0   7    0.01    0.04 
  16   0   7    0.02    0.04 
  18   0   7    0.02    0.04 
  20   0   7    0.03    0.03 
 -27   1   7    0.08    0.03 
 -25   1   7    0.31    0.04 
 -23   1   7    0.20    0.04 
 -21   1   7    0.70    0.08 
 -19   1   7   15.63    0.52 
 -13   1   7   32.98    1.25 
 -11   1   7   12.04    0.47 
  -9   1   7    1.24    0.09 
  -7   1   7    1.90    0.10 
  -5   1   7   10.55    0.41 
  -3   1   7   18.39    0.69 
  -1   1   7    0.27    0.04 
   1   1   7   84.62    2.09 
   3   1   7   17.79    0.45 
   5   1   7    0.23    0.03 
   7   1   7    5.28    0.16 
  13   1   7    1.27    0.07 
  15   1   7    0.04    0.02 
  17   1   7    6.59    0.24 
  19   1   7    0.07    0.04 
  21   1   7    0.39    0.05 
 -26   2   7    0.08    0.03 
 -24   2   7    7.59    0.26 
 -22   2   7   17.12    0.54 
 -20   2   7   36.37    1.11 
 -12   2   7    8.12    0.35 
 -10   2   7    6.09    0.27 
  -8   2   7    3.96    0.19 
  -6   2   7   19.28    0.49 
  -4   2   7  310.01    7.42 
  -2   2   7  101.43    2.42 
   0   2   7   75.36    1.78 
   2   2   7  135.76    3.23 
   4   2   7    0.21    0.02 
   6   2   7    1.09    0.05 
   8   2   7    0.24    0.03 
  10   2   7    0.05    0.03 
  12   2   7   58.10    1.38 
  14   2   7    4.90    0.19 
  16   2   7   27.19    0.88 
  18   2   7   18.83    0.43 
  20   2   7    6.89    0.23 
 -25   3   7    0.17    0.03 
 -23   3   7    5.57    0.20 
 -21   3   7    0.07    0.04 
 -19   3   7    2.81    0.14 
 -17   3   7    1.15    0.09 
  -9   3   7    1.77    0.07 
  -7   3   7   22.38    0.59 
  -5   3   7    0.06    0.02 
  -3   3   7   30.18    0.77 
  -1   3   7    0.97    0.05 
   1   3   7   23.26    0.59 
   3   3   7    0.09    0.02 
   5   3   7    4.04    0.16 
   7   3   7   11.28    0.39 
   9   3   7    1.18    0.07 
  11   3   7   26.31    0.63 
  13   3   7   14.82    0.38 
  15   3   7    2.97    0.12 
  17   3   7    0.04    0.02 
  19   3   7    4.62    0.12 
 -24   4   7    1.22    0.07 
 -22   4   7    8.35    0.28 
 -20   4   7    7.88    0.28 
 -18   4   7   13.40    0.46 
 -16   4   7   21.84    0.51 
 -14   4   7    8.32    0.31 
 -12   4   7    0.68    0.05 
  -8   4   7    7.54    0.29 
  -6   4   7   35.29    1.18 
  -4   4   7   13.90    0.37 
  -2   4   7    1.51    0.06 
   0   4   7    2.08    0.10 
   2   4   7    0.08    0.02 
   4   4   7    0.68    0.05 
   6   4   7    2.37    0.11 
   8   4   7    1.25    0.07 
  10   4   7    6.35    0.24 
  12   4   7    6.47    0.17 
  16   4   7    0.15    0.03 
  18   4   7    0.88    0.05 
 -23   5   7    8.63    0.27 
 -21   5   7    0.55    0.05 
 -19   5   7   20.54    0.66 
 -17   5   7    0.66    0.05 
 -15   5   7   13.33    0.32 
 -13   5   7    6.65    0.26 
 -11   5   7   10.72    0.41 
  -9   5   7   14.43    0.37 
  -7   5   7   34.86    1.14 
  -5   5   7   12.94    0.43 
  -3   5   7  119.79    3.95 
  -1   5   7    2.07    0.10 
   1   5   7   21.83    0.72 
   3   5   7   15.65    0.53 
   5   5   7   29.56    0.98 
   7   5   7    7.42    0.28 
   9   5   7    2.68    0.12 
  13   5   7   49.51    1.67 
  15   5   7   23.00    0.76 
 -18   6   7   34.82    0.78 
 -16   6   7   12.26    0.42 
 -14   6   7    3.46    0.15 
 -12   6   7    4.38    0.19 
 -10   6   7    1.22    0.06 
  -4   6   7    1.30    0.08 
  -2   6   7   18.30    0.63 
   0   6   7    0.50    0.05 
   2   6   7    4.98    0.20 
   4   6   7    0.43    0.04 
 -15   7   7    2.76    0.08 
 -13   7   7    0.11    0.03 
 -11   7   7    3.73    0.16 
  -9   7   7   23.13    0.80 
  -8   8   7    7.82    0.19 
  -6   8   7    8.69    0.31 
  -6  -8   8    1.42    0.07 
  -4  -8   8    6.42    0.16 
  -2  -8   8    0.77    0.04 
   0  -8   8   17.92    0.39 
 -15  -7   8    0.16    0.03 
 -13  -7   8   19.46    0.66 
 -11  -7   8   12.08    0.42 
  -9  -7   8    2.48    0.08 
  -7  -7   8    2.85    0.07 
  -5  -7   8    0.06    0.02 
  -3  -7   8    2.37    0.07 
  -1  -7   8    0.23    0.03 
   1  -7   8    2.48    0.08 
   3  -7   8   11.78    0.28 
   5  -7   8    0.04    0.02 
   7  -7   8    0.93    0.06 
 -18  -6   8    9.65    0.18 
 -16  -6   8   14.85    0.28 
 -14  -6   8   42.77    0.94 
 -12  -6   8    7.40    0.16 
 -10  -6   8    2.78    0.08 
  -8  -6   8    1.20    0.05 
  -6  -6   8   17.93    0.30 
  -4  -6   8    0.18    0.03 
  -2  -6   8   16.65    0.29 
   0  -6   8    5.58    0.11 
   2  -6   8    2.26    0.08 
   4  -6   8    3.52    0.11 
   6  -6   8   41.38    1.41 
 -21  -5   8    7.48    0.18 
 -19  -5   8    0.19    0.03 
 -17  -5   8   14.06    0.26 
 -15  -5   8   12.32    0.21 
 -13  -5   8   34.52    0.49 
 -11  -5   8    3.73    0.09 
  -9  -5   8   25.90    0.35 
  -7  -5   8    6.91    0.12 
  -5  -5   8   10.47    0.19 
  -3  -5   8    4.40    0.10 
  -1  -5   8    0.88    0.04 
   1  -5   8    3.52    0.08 
   3  -5   8    0.77    0.04 
   5  -5   8    0.01    0.02 
 -22  -4   8    0.25    0.02 
 -20  -4   8   17.64    0.32 
 -18  -4   8    5.86    0.12 
 -16  -4   8    5.65    0.10 
 -14  -4   8   11.90    0.17 
 -12  -4   8    3.03    0.07 
 -10  -4   8    0.73    0.05 
  -8  -4   8    1.40    0.07 
  -6  -4   8   10.45    0.29 
  -4  -4   8   12.70    0.34 
  -2  -4   8   49.03    1.78 
   0  -4   8    8.38    0.37 
   2  -4   8   22.88    0.88 
   4  -4   8    6.62    0.31 
   6  -4   8   33.51    1.26 
   8  -4   8    7.05    0.33 
 -23  -3   8    5.62    0.12 
 -21  -3   8    4.52    0.11 
 -19  -3   8    3.19    0.07 
 -17  -3   8   67.06    0.90 
 -15  -3   8   28.68    0.45 
 -13  -3   8   32.40    1.10 
 -11  -3   8    0.80    0.08 
  -9  -3   8   34.52    0.84 
  -7  -3   8    8.41    0.23 
  -5  -3   8    6.00    0.18 
  -3  -3   8  152.45    5.56 
  -1  -3   8    0.45    0.06 
   1  -3   8   36.08    1.32 
   3  -3   8    0.68    0.07 
   5  -3   8    0.14    0.05 
 -26  -2   8    1.57    0.07 
 -24  -2   8    3.55    0.15 
 -22  -2   8   10.67    0.26 
 -20  -2   8    5.00    0.14 
 -18  -2   8    1.68    0.06 
 -16  -2   8    8.39    0.18 
 -14  -2   8   19.79    0.69 
 -12  -2   8    7.91    0.23 
 -10  -2   8   42.54    1.06 
  -8  -2   8   12.71    0.28 
  -6  -2   8   20.64    0.51 
  -4  -2   8   23.23    0.57 
 -27  -1   8    8.22    0.27 
 -25  -1   8   19.12    0.60 
 -23  -1   8   -0.01    0.03 
 -21  -1   8   19.79    0.63 
 -19  -1   8    1.30    0.07 
 -17  -1   8   96.42    2.86 
 -13  -1   8    1.80    0.08 
 -11  -1   8   19.13    0.48 
  -9  -1   8   10.29    0.28 
  -7  -1   8    2.83    0.10 
  -5  -1   8   33.84    1.30 
  -3  -1   8  197.28    7.34 
  17  -1   8   13.23    0.45 
  19  -1   8    1.24    0.07 
 -26   0   8    2.33    0.10 
 -24   0   8    2.08    0.11 
 -22   0   8   15.30    0.50 
 -20   0   8    5.29    0.21 
 -12   0   8    0.74    0.07 
 -10   0   8   85.91    3.20 
  -8   0   8   25.51    0.93 
  -6   0   8   78.29    2.85 
  -4   0   8    2.16    0.12 
  -2   0   8   85.00    3.15 
   0   0   8    0.29    0.05 
   2   0   8    2.33    0.13 
  14   0   8  136.28    4.20 
  16   0   8   65.64    2.04 
  18   0   8   25.76    0.83 
  20   0   8    0.57    0.05 
 -27   1   8    9.19    0.28 
 -25   1   8   19.90    0.61 
 -23   1   8    0.02    0.03 
 -21   1   8   20.54    0.63 
 -19   1   8    1.23    0.10 
 -13   1   8    1.76    0.11 
 -11   1   8   18.61    0.73 
  -9   1   8   10.49    0.43 
  -7   1   8    2.90    0.15 
  -5   1   8   36.07    1.31 
  -3   1   8  213.52    7.36 
  -1   1   8    5.69    0.16 
   1   1   8    4.58    0.14 
   3   1   8   36.74    0.95 
   5   1   8    6.34    0.19 
  11   1   8   11.51    0.39 
  13   1   8   11.71    0.40 
  15   1   8    0.05    0.02 
  17   1   8   14.13    0.45 
  19   1   8    1.38    0.08 
 -26   2   8    1.69    0.08 
 -24   2   8    3.82    0.15 
 -22   2   8   11.05    0.37 
 -20   2   8    4.89    0.20 
 -18   2   8    1.56    0.11 
 -12   2   8    7.99    0.35 
 -10   2   8   42.50    1.61 
  -8   2   8   12.97    0.52 
  -6   2   8   20.27    0.53 
  -4   2   8   23.23    0.59 
  -2   2   8    4.46    0.14 
   0   2   8    0.25    0.03 
   2   2   8   62.27    1.55 
   4   2   8   56.75    1.42 
   6   2   8   26.12    0.90 
   8   2   8    6.47    0.26 
  10   2   8    1.87    0.10 
  14   2   8   42.78    1.35 
  16   2   8   17.19    0.39 
  18   2   8    0.60    0.06 
  20   2   8    0.09    0.02 
 -25   3   8   12.83    0.40 
 -23   3   8    5.99    0.21 
 -21   3   8    4.89    0.19 
 -19   3   8    3.18    0.15 
 -17   3   8   63.94    1.43 
 -15   3   8   28.41    0.67 
  -9   3   8   31.32    1.17 
  -7   3   8    7.95    0.23 
  -5   3   8    6.05    0.18 
  -3   3   8  161.85    3.96 
  -1   3   8    0.59    0.04 
   1   3   8   37.52    0.93 
   3   3   8    0.70    0.05 
   5   3   8    0.17    0.03 
   7   3   8   20.97    0.71 
   9   3   8    1.43    0.06 
  11   3   8    0.14    0.02 
  13   3   8    1.84    0.09 
  15   3   8    0.21    0.03 
  17   3   8    2.65    0.08 
  19   3   8    9.75    0.30 
 -22   4   8    0.24    0.04 
 -20   4   8   16.99    0.55 
 -18   4   8    5.54    0.16 
 -16   4   8    5.37    0.13 
 -14   4   8   12.31    0.43 
 -12   4   8    2.95    0.14 
 -10   4   8    0.62    0.06 
  -8   4   8    1.24    0.08 
  -6   4   8   10.47    0.38 
  -4   4   8   13.12    0.46 
  -2   4   8   50.30    1.69 
   0   4   8    9.03    0.32 
   2   4   8   24.97    0.81 
   4   4   8    7.04    0.26 
   6   4   8   36.77    1.18 
   8   4   8    7.53    0.28 
  10   4   8    0.01    0.03 
  12   4   8    9.42    0.33 
  14   4   8    0.20    0.03 
  16   4   8    7.11    0.24 
 -21   5   8    7.05    0.24 
 -19   5   8    0.12    0.02 
 -17   5   8   13.24    0.33 
 -15   5   8   12.99    0.43 
 -13   5   8   36.19    1.17 
 -11   5   8    3.50    0.17 
  -9   5   8   24.46    0.87 
  -5   5   8   11.07    0.39 
  -3   5   8    4.65    0.19 
  -1   5   8    0.94    0.07 
   1   5   8    3.85    0.15 
   3   5   8    0.96    0.06 
   5   5   8   -0.02    0.02 
   7   5   8    1.93    0.10 
  11   5   8    1.29    0.07 
  13   5   8   12.54    0.43 
  15   5   8    2.66    0.10 
 -18   6   8    9.39    0.33 
 -16   6   8   15.27    0.36 
 -14   6   8   45.32    1.46 
 -12   6   8    7.86    0.29 
 -10   6   8    2.63    0.13 
  -8   6   8    1.13    0.06 
  -6   6   8   18.29    0.63 
  -4   6   8    0.22    0.04 
  -2   6   8   17.15    0.59 
   0   6   8    5.51    0.22 
   2   6   8    2.25    0.10 
 -15   7   8    0.12    0.03 
 -13   7   8   20.84    0.67 
 -11   7   8   12.31    0.43 
  -9   7   8    2.53    0.12 
  -7   7   8    2.68    0.12 
 -13  -7   9    0.20    0.03 
 -11  -7   9   10.41    0.24 
  -9  -7   9   15.43    0.34 
  -7  -7   9   11.93    0.23 
  -5  -7   9   13.74    0.26 
  -3  -7   9   20.05    0.44 
  -1  -7   9   23.79    0.52 
   1  -7   9    4.62    0.12 
   3  -7   9    4.27    0.11 
   5  -7   9    1.41    0.07 
 -18  -6   9    3.59    0.10 
 -16  -6   9    0.23    0.03 
 -14  -6   9    0.06    0.03 
 -12  -6   9    4.08    0.10 
 -10  -6   9   30.14    0.66 
  -8  -6   9    8.05    0.17 
  -6  -6   9    3.19    0.08 
  -4  -6   9    0.55    0.04 
  -2  -6   9   15.05    0.28 
   0  -6   9    4.21    0.12 
   2  -6   9    0.19    0.03 
   4  -6   9    4.01    0.11 
   6  -6   9    0.75    0.06 
 -21  -5   9    6.91    0.17 
 -19  -5   9    1.77    0.05 
 -17  -5   9   78.64    1.30 
 -15  -5   9    4.39    0.11 
 -13  -5   9   45.39    0.63 
 -11  -5   9    8.66    0.16 
  -9  -5   9    2.20    0.05 
  -7  -5   9   15.17    0.26 
  -5  -5   9    5.88    0.12 
  -3  -5   9   19.92    0.34 
  -1  -5   9   96.53    1.51 
   1  -5   9    6.52    0.15 
   3  -5   9    6.62    0.15 
   5  -5   9    0.91    0.07 
 -22  -4   9   14.20    0.26 
 -20  -4   9    1.72    0.06 
 -18  -4   9   10.91    0.21 
 -16  -4   9    0.30    0.03 
 -14  -4   9   54.31    0.74 
 -12  -4   9    7.10    0.12 
 -10  -4   9   58.03    0.68 
  -8  -4   9    1.22    0.05 
  -6  -4   9   25.78    0.52 
  -4  -4   9    7.22    0.31 
  -2  -4   9    3.79    0.13 
   0  -4   9    4.64    0.15 
   2  -4   9   49.11    1.21 
   4  -4   9    1.17    0.10 
 -23  -3   9    3.59    0.10 
 -21  -3   9    7.00    0.14 
 -19  -3   9    2.38    0.06 
 -17  -3   9    4.66    0.09 
 -15  -3   9   33.18    0.46 
 -13  -3   9   30.67    0.48 
 -11  -3   9   17.33    0.61 
  -9  -3   9    0.02    0.02 
  -7  -3   9    5.24    0.16 
  -5  -3   9   48.38    1.72 
  -3  -3   9  100.87    3.42 
  -1  -3   9    0.69    0.07 
 -26  -2   9    3.01    0.11 
 -24  -2   9    1.64    0.09 
 -22  -2   9    0.75    0.05 
 -20  -2   9    4.18    0.13 
 -18  -2   9   89.10    1.49 
 -16  -2   9   40.45    0.71 
 -14  -2   9   82.81    2.71 
 -12  -2   9   76.78    2.50 
 -10  -2   9   37.21    0.93 
  -8  -2   9    0.26    0.03 
  -6  -2   9    0.25    0.05 
 -25  -1   9    0.08    0.03 
 -23  -1   9    3.87    0.16 
 -21  -1   9   14.59    0.48 
 -19  -1   9    0.47    0.05 
 -17  -1   9   10.20    0.35 
 -13  -1   9    1.27    0.10 
 -11  -1   9    7.03    0.20 
  -9  -1   9    0.13    0.03 
  -7  -1   9   21.72    0.86 
  -5  -1   9   39.22    1.54 
 -26   0   9    0.01    0.03 
 -24   0   9   -0.01    0.03 
 -22   0   9    0.00    0.03 
 -20   0   9    0.03    0.04 
 -18   0   9   -0.02    0.04 
 -12   0   9    0.01    0.03 
 -10   0   9    0.10    0.04 
  -8   0   9    0.01    0.03 
  -6   0   9    0.05    0.03 
  -4   0   9    0.00    0.03 
  -2   0   9    0.20    0.04 
  14   0   9    0.01    0.03 
  16   0   9    0.06    0.03 
  18   0   9    0.01    0.03 
 -25   1   9    0.13    0.03 
 -23   1   9    3.83    0.16 
 -21   1   9   14.44    0.48 
 -19   1   9    0.38    0.06 
 -11   1   9    6.98    0.31 
  -9   1   9    0.14    0.05 
  -7   1   9   22.35    0.86 
  -5   1   9   42.87    1.56 
  -3   1   9   42.65    1.57 
  -1   1   9   18.06    0.71 
   1   1   9    7.74    0.35 
   3   1   9    1.52    0.11 
   9   1   9    0.26    0.04 
  11   1   9    3.44    0.14 
  13   1   9    9.53    0.34 
  15   1   9    4.12    0.17 
  17   1   9    0.30    0.04 
  19   1   9    0.71    0.05 
 -26   2   9    3.13    0.12 
 -24   2   9    1.79    0.09 
 -22   2   9    0.72    0.07 
 -20   2   9    4.03    0.18 
 -18   2   9   87.56    2.63 
 -16   2   9   38.65    1.29 
 -10   2   9   36.67    1.41 
  -8   2   9    0.26    0.06 
  -4   2   9    9.56    0.27 
  -2   2   9   50.00    1.27 
   0   2   9    2.25    0.08 
   2   2   9  105.03    2.64 
   4   2   9   11.01    0.40 
   6   2   9   13.40    0.50 
   8   2   9    0.04    0.02 
  10   2   9    1.21    0.07 
  12   2   9    3.95    0.15 
  14   2   9    2.14    0.10 
  16   2   9    0.36    0.05 
  18   2   9    1.85    0.09 
 -25   3   9    0.09    0.03 
 -23   3   9    3.84    0.15 
 -21   3   9    6.83    0.25 
 -19   3   9    2.34    0.13 
 -17   3   9    4.75    0.14 
 -15   3   9   34.02    1.09 
 -13   3   9   31.03    0.72 
  -7   3   9    4.91    0.21 
  -5   3   9   48.28    1.65 
  -3   3   9   99.17    3.28 
  -1   3   9    0.67    0.05 
   1   3   9    9.69    0.35 
   3   3   9    0.41    0.05 
   5   3   9    0.25    0.03 
   7   3   9   88.77    2.09 
   9   3   9   11.00    0.29 
  11   3   9    8.92    0.24 
  13   3   9   25.67    0.83 
  15   3   9    0.29    0.04 
  17   3   9    0.20    0.03 
 -24   4   9    3.93    0.14 
 -22   4   9   13.89    0.45 
 -20   4   9    1.61    0.09 
 -18   4   9   10.51    0.26 
 -16   4   9    0.27    0.03 
 -14   4   9   55.76    1.25 
 -12   4   9    7.26    0.27 
 -10   4   9   54.09    1.37 
  -8   4   9    1.20    0.06 
  -6   4   9   26.04    0.90 
  -4   4   9    7.23    0.28 
  -2   4   9    3.61    0.16 
   0   4   9    4.73    0.19 
   2   4   9   52.83    1.72 
   4   4   9    1.19    0.07 
   6   4   9   13.81    0.48 
   8   4   9    0.36    0.03 
  10   4   9    0.62    0.05 
  12   4   9    5.43    0.20 
  14   4   9   24.39    0.77 
 -21   5   9    6.58    0.22 
 -19   5   9    1.49    0.09 
 -17   5   9   77.04    2.41 
 -15   5   9    4.46    0.13 
 -13   5   9   46.84    1.06 
 -11   5   9    8.88    0.32 
  -9   5   9    2.05    0.08 
  -7   5   9   14.75    0.37 
  -5   5   9    6.09    0.24 
  -3   5   9   20.27    0.69 
  -1   5   9   98.34    3.21 
   1   5   9    6.70    0.25 
   3   5   9    6.59    0.25 
   5   5   9    0.92    0.06 
   9   5   9   56.26    2.01 
  11   5   9   22.50    0.75 
  13   5   9    3.48    0.13 
 -18   6   9    3.39    0.14 
 -16   6   9    0.19    0.02 
 -14   6   9    0.02    0.02 
 -12   6   9    4.15    0.12 
 -10   6   9   28.63    0.99 
  -8   6   9    7.42    0.29 
  -6   6   9    3.12    0.08 
  -4   6   9    0.53    0.05 
  -2   6   9   14.37    0.52 
   8   6   9    4.74    0.18 
  10   6   9    0.38    0.03 
 -13   7   9    0.28    0.02 
 -11   7   9   10.83    0.26 
  -9   7   9   14.78    0.36 
  -7   7   9   11.47    0.29 
  -5   7   9   13.19    0.46 
 -11  -7  10    0.05    0.02 
  -9  -7  10   15.61    0.34 
  -7  -7  10    3.73    0.08 
  -5  -7  10    8.16    0.20 
  -3  -7  10    9.79    0.23 
  -1  -7  10    1.65    0.06 
   1  -7  10    4.44    0.11 
   3  -7  10   63.25    2.01 
 -16  -6  10    0.74    0.04 
 -14  -6  10    6.52    0.13 
 -12  -6  10    8.43    0.16 
 -10  -6  10    0.60    0.04 
  -8  -6  10    0.04    0.02 
  -6  -6  10   34.90    0.61 
  -4  -6  10    2.20    0.06 
  -2  -6  10    0.02    0.02 
   0  -6  10    7.31    0.19 
   2  -6  10   11.60    0.28 
   4  -6  10    6.07    0.23 
 -19  -5  10    0.14    0.02 
 -17  -5  10   77.64    1.33 
 -15  -5  10    3.61    0.08 
 -13  -5  10   19.47    0.28 
 -11  -5  10   12.77    0.19 
  -9  -5  10   19.76    0.29 
  -7  -5  10    2.40    0.06 
  -5  -5  10    1.31    0.05 
  -3  -5  10   50.40    0.79 
  -1  -5  10   27.62    0.45 
   1  -5  10    5.12    0.14 
   3  -5  10   46.14    1.50 
 -22  -4  10    9.96    0.22 
 -20  -4  10    0.55    0.04 
 -18  -4  10   11.29    0.22 
 -16  -4  10    0.89    0.04 
 -14  -4  10    0.14    0.02 
 -12  -4  10   13.11    0.20 
 -10  -4  10   24.56    0.33 
  -8  -4  10    3.19    0.07 
  -6  -4  10    2.35    0.05 
  -4  -4  10   10.47    0.17 
  -2  -4  10   39.75    0.64 
   0  -4  10   67.11    1.50 
   2  -4  10   16.12    0.56 
 -23  -3  10    2.87    0.12 
 -21  -3  10   26.70    0.47 
 -19  -3  10   10.05    0.19 
 -17  -3  10    5.20    0.11 
 -15  -3  10   13.37    0.23 
 -13  -3  10   50.26    0.68 
 -11  -3  10   13.32    0.20 
  -9  -3  10   31.35    0.75 
  -7  -3  10    2.04    0.12 
 -24  -2  10    2.74    0.12 
 -22  -2  10    9.39    0.22 
 -20  -2  10    8.99    0.22 
 -18  -2  10    0.04    0.02 
 -16  -2  10   74.91    1.10 
 -14  -2  10   18.32    0.35 
 -12  -2  10    8.45    0.34 
 -10  -2  10   82.18    2.77 
 -25  -1  10    1.26    0.07 
 -23  -1  10    2.35    0.12 
 -21  -1  10    6.93    0.26 
 -19  -1  10   65.57    1.36 
 -17  -1  10    2.13    0.09 
 -15  -1  10    0.33    0.06 
  -9  -1  10   59.31    2.32 
  -7  -1  10   43.89    1.71 
 -26   0  10   35.32    1.05 
 -24   0  10    5.99    0.22 
 -22   0  10    3.54    0.16 
 -20   0  10   17.57    0.57 
 -18   0  10   22.08    0.70 
  -8   0  10    4.79    0.22 
  -6   0  10   23.75    0.89 
  -4   0  10    0.05    0.03 
  -2   0  10   36.26    1.42 
 -25   1  10    1.28    0.08 
 -23   1  10    2.40    0.12 
 -21   1  10    6.60    0.25 
 -19   1  10   63.93    1.92 
 -17   1  10    2.23    0.13 
  -7   1  10   45.75    1.72 
  -3   1  10   26.43    1.02 
  -1   1  10   62.26    2.32 
   1   1  10   22.54    0.94 
   7   1  10  244.08    7.52 
   9   1  10   88.01    2.86 
  13   1  10   39.11    1.21 
  15   1  10   19.82    0.65 
  17   1  10   14.61    0.47 
 -26   2  10   18.01    0.54 
 -24   2  10    2.86    0.12 
 -22   2  10    9.62    0.32 
 -20   2  10    8.78    0.31 
 -18   2  10    0.04    0.03 
 -16   2  10   74.68    2.35 
 -14   2  10   19.39    0.64 
   0   2  10   22.38    0.81 
   2   2  10    0.99    0.07 
   4   2  10   33.05    1.10 
  10   2  10   27.41    0.87 
  12   2  10    3.77    0.15 
  14   2  10    0.15    0.04 
  16   2  10    2.60    0.11 
 -23   3  10    2.78    0.12 
 -21   3  10   25.30    0.81 
 -19   3  10    9.50    0.24 
 -17   3  10    5.32    0.22 
 -15   3  10   14.01    0.48 
 -13   3  10   50.69    1.15 
 -11   3  10   13.16    0.33 
  -5   3  10    1.76    0.10 
  -3   3  10   18.34    0.67 
  -1   3  10  228.04    7.71 
   1   3  10    3.65    0.16 
   3   3  10    2.70    0.09 
   5   3  10   17.47    0.44 
   7   3  10   88.32    2.08 
   9   3  10  171.84    5.49 
  11   3  10    7.58    0.27 
  13   3  10    0.23    0.03 
  15   3  10   15.09    0.47 
 -22   4  10    9.50    0.31 
 -20   4  10    0.55    0.04 
 -18   4  10   10.56    0.39 
 -16   4  10    0.74    0.08 
 -14   4  10    0.17    0.03 
 -12   4  10   13.38    0.33 
 -10   4  10   23.36    0.57 
  -8   4  10    3.09    0.09 
  -6   4  10    2.31    0.07 
  -4   4  10   10.66    0.27 
  -2   4  10   39.21    0.93 
   0   4  10   67.17    1.57 
   2   4  10   16.56    0.41 
   4   4  10   11.04    0.28 
   6   4  10    0.24    0.03 
   8   4  10   10.95    0.38 
  10   4  10   33.13    1.09 
  12   4  10    3.91    0.15 
  14   4  10    2.34    0.09 
 -19   5  10    0.07    0.03 
 -17   5  10   80.48    2.47 
 -15   5  10    3.54    0.11 
 -13   5  10   20.01    0.47 
 -11   5  10   12.60    0.32 
  -9   5  10   18.49    0.39 
  -7   5  10    2.40    0.07 
  -5   5  10    1.28    0.06 
  -3   5  10   49.38    1.16 
  -1   5  10   27.69    0.66 
   1   5  10    5.12    0.21 
   3   5  10   46.33    1.11 
   5   5  10    3.60    0.14 
   7   5  10    8.08    0.30 
   9   5  10   71.19    2.33 
  11   5  10    1.23    0.06 
 -16   6  10    0.61    0.06 
 -14   6  10    6.68    0.17 
 -12   6  10    8.78    0.22 
 -10   6  10    0.61    0.05 
  -8   6  10    0.00    0.02 
  -6   6  10   32.00    1.12 
  -4   6  10    2.16    0.10 
  -2   6  10    0.02    0.02 
   0   6  10    7.35    0.27 
   2   6  10   11.69    0.41 
   4   6  10    5.99    0.22 
   6   6  10   13.68    0.48 
   8   6  10    9.89    0.34 
 -11   7  10    0.06    0.02 
  -9   7  10   15.26    0.36 
  -7   7  10    3.80    0.15 
  -5   7  10    8.20    0.29 
  -3   7  10    9.11    0.33 
  -1   7  10    1.53    0.07 
   1   7  10    4.07    0.16 
  -9  -7  11    7.15    0.23 
  -7  -7  11   25.05    0.55 
  -5  -7  11    3.07    0.08 
  -3  -7  11    3.14    0.09 
  -1  -7  11   26.32    0.58 
 -14  -6  11    7.39    0.14 
 -12  -6  11    0.51    0.03 
 -10  -6  11    3.01    0.07 
  -8  -6  11    0.06    0.02 
  -6  -6  11   14.40    0.27 
  -4  -6  11    1.34    0.05 
  -2  -6  11   14.73    0.34 
   0  -6  11   19.73    0.44 
   2  -6  11    1.17    0.07 
   4  -6  11   12.84    0.44 
 -19  -5  11    1.09    0.06 
 -17  -5  11    1.22    0.04 
 -15  -5  11    9.44    0.18 
 -13  -5  11  105.92    1.78 
 -11  -5  11   31.80    0.49 
  -9  -5  11   13.39    0.22 
  -7  -5  11   13.71    0.23 
  -5  -5  11    0.02    0.02 
  -3  -5  11    9.93    0.20 
  -1  -5  11    0.86    0.05 
   1  -5  11   26.82    0.90 
   3  -5  11   42.96    1.36 
 -20  -4  11    1.19    0.05 
 -18  -4  11    5.79    0.11 
 -16  -4  11   99.66    1.48 
 -14  -4  11    6.01    0.10 
 -12  -4  11    8.28    0.13 
 -10  -4  11    0.56    0.03 
  -8  -4  11    0.44    0.03 
  -6  -4  11    1.68    0.05 
  -4  -4  11    0.25    0.02 
  -2  -4  11   20.38    0.38 
   0  -4  11   31.94    1.06 
   2  -4  11    0.43    0.05 
 -21  -3  11    6.20    0.15 
 -19  -3  11    0.34    0.02 
 -17  -3  11   30.25    0.48 
 -15  -3  11   74.64    1.12 
 -13  -3  11  106.01    1.42 
 -11  -3  11    0.10    0.02 
  -9  -3  11   21.15    0.39 
  -7  -3  11    3.74    0.08 
  -5  -3  11    2.92    0.08 
  -3  -3  11   18.79    0.35 
  -1  -3  11   24.14    0.54 
   1  -3  11   38.09    1.21 
 -24  -2  11    3.74    0.14 
 -22  -2  11    0.07    0.03 
 -20  -2  11   14.73    0.34 
 -18  -2  11    3.66    0.11 
 -16  -2  11   25.32    0.45 
 -14  -2  11   23.12    0.33 
 -12  -2  11   11.55    0.23 
 -10  -2  11    0.10    0.04 
 -25  -1  11    0.79    0.06 
 -23  -1  11    0.72    0.06 
 -21  -1  11    8.43    0.29 
 -19  -1  11    6.26    0.24 
 -17  -1  11   11.54    0.28 
 -15  -1  11   37.76    0.68 
 -13  -1  11   12.91    0.30 
 -26   0  11    0.00    0.02 
 -24   0  11    0.00    0.03 
 -22   0  11    0.00    0.03 
 -20   0  11    0.01    0.03 
 -18   0  11    0.00    0.04 
 -16   0  11    0.02    0.02 
 -14   0  11    0.01    0.03 
 -25   1  11    0.85    0.06 
 -23   1  11    0.63    0.06 
 -21   1  11    7.99    0.29 
 -19   1  11    6.32    0.24 
 -17   1  11   11.48    0.28 
 -15   1  11   38.77    1.23 
 -13   1  11   13.12    0.46 
   3   1  11   17.81    0.58 
   5   1  11    7.72    0.27 
   7   1  11    2.55    0.11 
 -22   2  11    0.06    0.03 
 -20   2  11   14.51    0.48 
 -18   2  11    3.61    0.11 
 -16   2  11   25.45    0.84 
 -14   2  11   23.70    0.79 
 -12   2  11   11.81    0.43 
   0   2  11    9.45    0.34 
   2   2  11   11.22    0.38 
   6   2  11    4.71    0.18 
   8   2  11    3.95    0.15 
  10   2  11    3.45    0.14 
  14   2  11    2.31    0.10 
 -23   3  11    5.22    0.18 
 -21   3  11    6.12    0.22 
 -19   3  11    0.32    0.05 
 -17   3  11   31.40    0.99 
 -15   3  11   79.10    2.39 
 -13   3  11  105.61    2.40 
  -9   3  11   19.98    0.50 
  -7   3  11    3.95    0.12 
  -5   3  11    3.20    0.13 
  -3   3  11   18.76    0.46 
  -1   3  11   24.42    0.60 
   1   3  11   36.52    0.89 
   3   3  11  105.47    2.49 
   5   3  11   19.83    0.67 
   7   3  11   19.72    0.65 
   9   3  11    2.35    0.10 
  11   3  11    6.28    0.22 
  13   3  11    0.99    0.06 
 -20   4  11    1.01    0.07 
 -18   4  11    5.79    0.23 
 -16   4  11  107.03    3.20 
 -14   4  11    5.94    0.16 
 -12   4  11    8.52    0.22 
 -10   4  11    0.57    0.04 
  -8   4  11    0.42    0.04 
  -6   4  11    1.59    0.06 
  -4   4  11    0.20    0.03 
  -2   4  11   19.36    0.49 
   0   4  11   31.92    0.78 
   2   4  11    0.42    0.03 
   4   4  11   62.77    1.52 
   6   4  11   14.86    0.50 
   8   4  11    4.08    0.16 
  10   4  11    4.21    0.15 
  12   4  11    0.18    0.02 
 -19   5  11    1.01    0.06 
 -17   5  11    1.24    0.08 
 -15   5  11   10.06    0.35 
 -13   5  11  105.26    2.38 
 -11   5  11   31.44    0.74 
  -9   5  11   12.88    0.32 
  -7   5  11   13.73    0.34 
  -5   5  11    0.07    0.03 
  -3   5  11    9.59    0.25 
  -1   5  11    0.83    0.06 
   1   5  11   26.82    0.91 
   3   5  11   40.27    1.39 
   5   5  11    2.79    0.12 
   7   5  11   20.62    0.69 
   9   5  11   10.89    0.37 
 -16   6  11   65.83    2.05 
 -14   6  11    7.55    0.19 
 -12   6  11    0.52    0.06 
 -10   6  11    2.98    0.09 
  -8   6  11    0.11    0.02 
  -6   6  11   14.20    0.49 
  -4   6  11    1.24    0.07 
  -2   6  11   14.54    0.50 
   0   6  11   19.58    0.66 
   2   6  11    1.15    0.06 
   4   6  11   13.05    0.45 
   6   6  11   17.37    0.59 
  -9   7  11    7.17    0.25 
  -7   7  11   25.56    0.84 
  -5   7  11    3.23    0.12 
  -3   7  11    3.24    0.12 
 -14  -6  12    3.10    0.12 
 -12  -6  12    2.64    0.08 
 -10  -6  12    2.75    0.07 
  -8  -6  12    6.95    0.14 
  -6  -6  12    2.04    0.07 
  -4  -6  12    9.80    0.23 
  -2  -6  12    8.31    0.20 
   0  -6  12    0.76    0.06 
   2  -6  12   38.78    1.29 
 -17  -5  12    1.64    0.04 
 -15  -5  12    1.19    0.04 
 -13  -5  12   15.01    0.28 
 -11  -5  12   35.13    0.54 
  -9  -5  12    0.65    0.03 
  -7  -5  12   16.19    0.26 
  -5  -5  12    1.48    0.05 
  -3  -5  12   29.51    0.65 
  -1  -5  12   65.78    1.41 
   1  -5  12    1.41    0.08 
 -20  -4  12    0.07    0.03 
 -18  -4  12   15.49    0.33 
 -16  -4  12    0.35    0.04 
 -14  -4  12    4.74    0.11 
 -12  -4  12    0.71    0.03 
 -10  -4  12   12.97    0.21 
  -8  -4  12   24.59    0.38 
  -6  -4  12   15.98    0.26 
  -4  -4  12    4.09    0.09 
  -2  -4  12   85.32    2.75 
   0  -4  12   72.50    2.27 
 -21  -3  12    9.50    0.29 
 -19  -3  12    0.09    0.02 
 -17  -3  12    0.06    0.02 
 -15  -3  12    0.19    0.04 
 -13  -3  12   71.25    1.52 
 -11  -3  12   70.06    1.17 
  -9  -3  12    9.37    0.16 
  -7  -3  12   13.67    0.23 
  -5  -3  12    0.74    0.03 
  -3  -3  12  120.18    2.49 
  -1  -3  12   93.50    3.00 
 -22  -2  12    0.05    0.02 
 -20  -2  12    2.83    0.13 
 -18  -2  12    2.92    0.09 
 -16  -2  12   21.20    0.46 
 -14  -2  12    0.51    0.05 
 -12  -2  12    0.65    0.05 
 -10  -2  12   27.57    0.61 
  -8  -2  12    4.80    0.13 
  -6  -2  12   45.25    0.94 
  -4  -2  12   11.03    0.26 
  -2  -2  12   70.58    2.21 
 -25  -1  12    0.13    0.03 
 -23  -1  12   26.65    0.78 
 -21  -1  12    0.11    0.04 
 -19  -1  12   63.09    1.91 
 -17  -1  12    0.10    0.04 
 -15  -1  12  135.48    2.29 
 -13  -1  12   35.35    0.76 
 -11  -1  12   45.37    0.97 
  -9  -1  12   15.15    0.35 
  -7  -1  12   29.65    0.88 
  -5  -1  12   43.09    1.22 
 -24   0  12    8.51    0.28 
 -22   0  12    3.78    0.16 
 -20   0  12   33.25    1.02 
 -18   0  12   10.37    0.36 
 -16   0  12   24.14    0.79 
 -14   0  12   20.01    0.68 
 -12   0  12    4.33    0.19 
 -10   0  12   32.60    0.69 
 -25   1  12    0.19    0.03 
 -23   1  12   24.98    0.78 
 -21   1  12    0.16    0.04 
 -19   1  12   65.55    1.90 
 -17   1  12    0.07    0.03 
 -15   1  12  140.96    4.25 
 -13   1  12   35.93    1.15 
 -11   1  12   45.59    1.48 
  -9   1  12   15.45    0.53 
 -24   2  12    0.21    0.03 
 -22   2  12    0.04    0.03 
 -18   2  12    2.71    0.14 
 -16   2  12   22.42    0.72 
 -14   2  12    0.58    0.07 
 -12   2  12    0.67    0.08 
 -10   2  12   27.40    0.92 
  -8   2  12    4.54    0.13 
  -6   2  12   43.94    1.01 
  -4   2  12   10.84    0.38 
  -2   2  12   72.12    2.26 
   0   2  12  148.04    4.62 
   4   2  12    0.07    0.02 
   8   2  12    5.25    0.20 
 -19   3  12    0.03    0.03 
 -17   3  12    0.07    0.04 
 -15   3  12    0.21    0.05 
 -13   3  12   73.74    2.31 
 -11   3  12   66.56    1.56 
  -9   3  12    9.17    0.24 
  -7   3  12   14.01    0.34 
  -5   3  12    0.66    0.06 
  -3   3  12  126.08    3.89 
  -1   3  12   98.53    3.09 
   1   3  12    1.11    0.07 
   3   3  12   24.20    0.79 
   5   3  12    0.66    0.05 
   7   3  12    0.06    0.02 
   9   3  12    0.14    0.02 
 -20   4  12    0.02    0.02 
 -18   4  12   15.34    0.52 
 -16   4  12    0.25    0.05 
 -14   4  12    4.99    0.21 
 -12   4  12    0.72    0.04 
 -10   4  12   12.33    0.32 
  -8   4  12   24.47    0.58 
  -6   4  12   16.88    0.56 
  -4   4  12    4.26    0.17 
  -2   4  12   87.09    2.83 
   0   4  12   71.13    1.77 
   2   4  12    1.40    0.07 
   4   4  12   24.14    0.79 
   6   4  12    3.11    0.12 
   8   4  12    6.59    0.22 
  10   4  12    9.98    0.34 
 -17   5  12    1.68    0.08 
 -15   5  12    1.24    0.08 
 -13   5  12   14.92    0.36 
 -11   5  12   34.17    0.81 
  -9   5  12    0.67    0.04 
  -7   5  12   17.24    0.56 
  -5   5  12    1.72    0.08 
  -3   5  12   30.80    0.98 
  -1   5  12   66.36    2.14 
   1   5  12    1.51    0.07 
   3   5  12    0.52    0.04 
   5   5  12    4.84    0.17 
   7   5  12    0.24    0.03 
 -14   6  12    3.27    0.13 
 -12   6  12    2.58    0.07 
 -10   6  12    2.71    0.08 
  -8   6  12    7.13    0.25 
  -6   6  12    2.05    0.09 
  -4   6  12   10.29    0.34 
  -2   6  12    8.54    0.29 
   0   6  12    0.64    0.04 
   2   6  12   40.65    1.32 
 -10  -6  13    0.09    0.02 
  -8  -6  13    0.10    0.02 
  -6  -6  13    0.05    0.02 
  -4  -6  13    8.44    0.19 
  -2  -6  13   13.70    0.45 
 -15  -5  13   11.58    0.21 
 -13  -5  13   10.25    0.17 
 -11  -5  13   28.83    0.44 
  -9  -5  13    2.55    0.06 
  -7  -5  13    0.25    0.02 
  -5  -5  13    0.05    0.02 
  -3  -5  13   15.91    0.36 
  -1  -5  13   34.39    1.12 
   1  -5  13   10.40    0.36 
 -18  -4  13    0.28    0.02 
 -16  -4  13    4.98    0.12 
 -14  -4  13    3.81    0.09 
 -12  -4  13    1.84    0.05 
 -10  -4  13    0.18    0.02 
  -8  -4  13    2.76    0.06 
  -6  -4  13   19.09    0.34 
  -4  -4  13    0.04    0.02 
  -2  -4  13    0.58    0.06 
   0  -4  13   29.82    1.00 
 -21  -3  13    0.01    0.02 
 -19  -3  13    1.08    0.04 
 -17  -3  13    1.03    0.05 
 -15  -3  13    5.11    0.11 
 -13  -3  13    7.03    0.14 
 -11  -3  13   25.63    0.45 
  -9  -3  13    2.61    0.07 
  -7  -3  13    1.67    0.05 
  -5  -3  13    0.04    0.02 
  -3  -3  13    5.80    0.23 
  -1  -3  13   22.09    0.74 
 -22  -2  13    2.56    0.09 
 -20  -2  13    0.83    0.07 
 -18  -2  13    4.03    0.11 
 -16  -2  13    1.81    0.06 
 -14  -2  13    4.50    0.13 
 -12  -2  13    0.04    0.02 
 -10  -2  13    0.57    0.05 
  -8  -2  13    3.33    0.10 
  -6  -2  13   12.86    0.29 
  -4  -2  13    0.91    0.08 
  -2  -2  13    1.59    0.10 
 -21  -1  13    1.11    0.08 
 -19  -1  13    0.97    0.08 
 -17  -1  13    0.78    0.05 
 -15  -1  13    2.52    0.09 
 -13  -1  13    0.48    0.04 
 -11  -1  13    3.86    0.12 
  -9  -1  13    1.13    0.06 
  -7  -1  13    1.17    0.06 
  -5  -1  13    1.28    0.09 
  -3  -1  13    0.07    0.04 
 -24   0  13   -0.01    0.02 
 -22   0  13    0.00    0.02 
 -20   0  13    0.02    0.03 
 -18   0  13    0.03    0.03 
 -16   0  13    0.02    0.03 
 -14   0  13    0.01    0.03 
 -12   0  13    0.02    0.03 
 -10   0  13    0.00    0.02 
  -8   0  13    0.03    0.03 
  -6   0  13    0.01    0.03 
  -4   0  13    0.05    0.03 
 -23   1  13    5.12    0.18 
 -21   1  13    1.10    0.07 
 -19   1  13    0.99    0.07 
 -17   1  13    0.79    0.07 
 -15   1  13    2.57    0.13 
 -13   1  13    0.52    0.06 
 -11   1  13    3.91    0.18 
  -9   1  13    0.99    0.08 
  -7   1  13    1.12    0.08 
  -5   1  13    1.27    0.09 
 -20   2  13    0.72    0.06 
 -18   2  13    3.94    0.17 
 -16   2  13    1.90    0.11 
 -14   2  13    4.89    0.20 
 -12   2  13    0.03    0.04 
 -10   2  13    0.50    0.06 
  -8   2  13    3.16    0.15 
  -6   2  13   12.29    0.44 
  -4   2  13    0.87    0.06 
  -2   2  13    1.61    0.08 
   0   2  13   11.85    0.41 
   2   2  13    1.71    0.08 
   4   2  13    5.51    0.21 
 -19   3  13    1.12    0.07 
 -17   3  13    0.90    0.07 
 -15   3  13    5.32    0.21 
 -13   3  13    7.26    0.27 
 -11   3  13   24.02    0.84 
  -9   3  13    2.39    0.08 
  -7   3  13    1.62    0.06 
  -5   3  13   -0.01    0.02 
  -3   3  13    5.95    0.21 
  -1   3  13   23.13    0.75 
   1   3  13   32.20    1.05 
   3   3  13    0.27    0.03 
   5   3  13   16.32    0.55 
   7   3  13    0.30    0.03 
 -18   4  13    0.29    0.04 
 -16   4  13    4.91    0.19 
 -14   4  13    3.86    0.17 
 -12   4  13    1.73    0.11 
 -10   4  13    0.15    0.02 
  -8   4  13    2.80    0.09 
  -6   4  13   19.88    0.65 
  -4   4  13    0.00    0.02 
  -2   4  13    0.54    0.05 
   0   4  13   32.27    1.02 
   2   4  13   15.59    0.52 
   4   4  13    7.22    0.26 
   6   4  13    0.02    0.02 
 -15   5  13   11.98    0.39 
 -13   5  13   10.62    0.36 
 -11   5  13   27.42    0.66 
  -9   5  13    2.54    0.08 
  -7   5  13    0.31    0.04 
  -5   5  13    0.12    0.03 
  -3   5  13   16.46    0.53 
  -1   5  13   35.88    1.14 
   1   5  13   11.12    0.36 
   3   5  13    2.45    0.10 
   5   5  13    7.87    0.27 
  -8   6  13    0.06    0.02 
  -6   6  13    0.04    0.02 
  -4   6  13    8.58    0.28 
  -2   6  13   13.53    0.45 
 -13  -5  14    0.33    0.02 
 -11  -5  14    4.74    0.09 
  -9  -5  14   10.52    0.24 
  -7  -5  14    1.26    0.05 
  -5  -5  14    3.06    0.08 
  -3  -5  14    1.86    0.09 
  -1  -5  14   25.82    0.85 
 -16  -4  14    0.32    0.03 
 -14  -4  14    3.21    0.07 
 -12  -4  14   39.76    0.67 
 -10  -4  14    0.03    0.02 
  -8  -4  14    0.02    0.02 
  -6  -4  14    0.95    0.05 
  -4  -4  14    1.03    0.07 
  -2  -4  14  100.87    3.23 
   0  -4  14    5.55    0.21 
 -19  -3  14    0.91    0.05 
 -17  -3  14    8.00    0.18 
 -15  -3  14    1.61    0.05 
 -13  -3  14    2.26    0.06 
 -11  -3  14   54.68    0.93 
  -9  -3  14   14.13    0.26 
  -7  -3  14    2.26    0.06 
  -5  -3  14    0.63    0.06 
  -3  -3  14    1.41    0.09 
  -1  -3  14  123.20    3.71 
 -20  -2  14    5.50    0.19 
 -18  -2  14    1.89    0.09 
 -16  -2  14    6.52    0.17 
 -14  -2  14    6.31    0.16 
 -12  -2  14   20.51    0.46 
 -10  -2  14    7.55    0.19 
  -8  -2  14    0.15    0.02 
  -6  -2  14    0.14    0.04 
  -4  -2  14   12.79    0.45 
  -2  -2  14   81.54    2.51 
 -19  -1  14   32.65    0.95 
 -17  -1  14   29.35    1.00 
 -15  -1  14    5.60    0.15 
 -13  -1  14   63.88    1.35 
 -11  -1  14  109.24    2.29 
  -9  -1  14   12.78    0.30 
  -7  -1  14   25.50    0.84 
  -5  -1  14   18.09    0.62 
  -3  -1  14   45.56    1.43 
 -22   0  14    1.24    0.06 
 -18   0  14   50.43    1.63 
 -16   0  14   55.79    1.73 
 -14   0  14   20.74    0.69 
 -12   0  14    2.95    0.15 
 -10   0  14   14.63    0.51 
  -8   0  14    5.94    0.24 
  -6   0  14    6.82    0.27 
 -19   1  14   30.56    1.01 
 -17   1  14   32.05    1.00 
 -15   1  14    5.96    0.23 
 -13   1  14   67.11    2.06 
 -11   1  14  106.64    3.47 
  -9   1  14   12.32    0.45 
  -7   1  14   24.64    0.84 
  -5   1  14   19.47    0.63 
 -20   2  14    5.44    0.20 
 -18   2  14    1.97    0.10 
 -16   2  14    7.21    0.26 
 -14   2  14    6.65    0.25 
 -12   2  14   20.91    0.71 
 -10   2  14    7.17    0.28 
  -8   2  14    0.13    0.04 
  -6   2  14    0.12    0.04 
 -17   3  14    8.28    0.29 
 -15   3  14    1.61    0.10 
 -13   3  14    2.38    0.12 
 -11   3  14   52.42    1.73 
  -9   3  14   13.43    0.48 
  -7   3  14    2.27    0.11 
  -5   3  14    0.57    0.04 
  -3   3  14    1.39    0.07 
  -1   3  14  115.64    3.82 
   1   3  14   16.02    0.53 
 -16   4  14    0.33    0.04 
 -14   4  14    3.34    0.14 
 -12   4  14   38.54    1.25 
 -10   4  14    0.06    0.03 
  -8   4  14    0.05    0.02 
  -6   4  14    0.91    0.05 
  -4   4  14    0.98    0.06 
  -2   4  14  105.36    3.32 
   0   4  14    5.64    0.20 
   2   4  14    3.74    0.14 
   4   4  14    4.50    0.16 
 -13   5  14    0.36    0.04 
 -11   5  14    4.57    0.17 
  -7   5  14    1.09    0.05 
  -5   5  14    2.76    0.11 
  -3   5  14    1.75    0.08 
  -1   5  14   27.57    0.87 
 -14  -4  15   17.46    0.31 
 -12  -4  15    1.17    0.05 
 -10  -4  15    5.26    0.13 
  -8  -4  15    6.39    0.16 
  -6  -4  15   20.32    0.62 
  -4  -4  15    1.25    0.07 
  -2  -4  15   18.99    0.62 
 -17  -3  15    5.14    0.17 
 -15  -3  15    2.10    0.05 
 -13  -3  15   21.06    0.37 
 -11  -3  15   19.20    0.34 
  -9  -3  15    0.23    0.03 
  -7  -3  15    0.22    0.04 
  -5  -3  15   55.54    1.76 
  -3  -3  15    6.77    0.25 
 -20  -2  15    0.19    0.02 
 -18  -2  15    1.07    0.06 
 -16  -2  15    0.09    0.02 
 -14  -2  15    9.52    0.18 
 -12  -2  15    0.27    0.02 
 -10  -2  15    3.49    0.10 
  -8  -2  15    4.83    0.19 
  -6  -2  15    0.49    0.06 
  -4  -2  15    0.74    0.06 
 -17  -1  15    5.00    0.20 
 -15  -1  15    0.73    0.06 
 -13  -1  15    8.57    0.31 
 -11  -1  15    2.28    0.12 
  -9  -1  15    0.48    0.06 
  -7  -1  15    1.26    0.09 
  -5  -1  15   19.49    0.67 
 -18   0  15    0.01    0.02 
 -16   0  15    0.12    0.03 
 -14   0  15    0.02    0.03 
 -12   0  15    0.02    0.03 
 -10   0  15    0.08    0.03 
  -8   0  15    0.03    0.03 
  -6   0  15    0.05    0.03 
 -19   1  15    0.53    0.04 
 -17   1  15    5.41    0.20 
 -15   1  15    0.79    0.07 
 -13   1  15    8.61    0.31 
 -11   1  15    2.20    0.12 
  -9   1  15    0.47    0.06 
  -7   1  15    1.17    0.08 
 -16   2  15    0.12    0.03 
 -14   2  15    9.70    0.34 
 -12   2  15    0.29    0.05 
 -10   2  15    3.19    0.15 
  -8   2  15    4.43    0.19 
 -17   3  15    5.24    0.19 
 -15   3  15    2.17    0.10 
 -13   3  15   20.91    0.69 
 -11   3  15   18.31    0.63 
  -9   3  15    0.24    0.04 
 -14   4  15   17.88    0.57 
 -12   4  15    1.15    0.07 
 -10   4  15    5.12    0.19 
 -15  -3  16    6.75    0.22 
 -13  -3  16    6.89    0.17 
 -11  -3  16    0.02    0.02 
  -9  -3  16    2.38    0.11 
  -7  -3  16    1.43    0.07 
  -5  -3  16   22.18    0.71 
 -16  -2  16    8.62    0.20 
 -14  -2  16   13.56    0.31 
 -12  -2  16   10.89    0.26 
 -10  -2  16    4.80    0.12 
  -8  -2  16   37.58    1.16 
  -6  -2  16   23.06    0.77 
  -4  -2  16   16.21    0.55 
 -19  -1  16    0.60    0.04 
 -17  -1  16    1.76    0.06 
 -15  -1  16    3.37    0.14 
 -13  -1  16   21.93    0.49 
 -11  -1  16    1.48    0.08 
  -9  -1  16    2.54    0.12 
  -7  -1  16    6.43    0.24 
  -5  -1  16   11.62    0.41 
 -18   0  16    5.26    0.19 
 -16   0  16   77.75    2.39 
 -14   0  16    5.47    0.21 
 -12   0  16    6.04    0.23 
 -10   0  16    2.39    0.12 
  -8   0  16   59.67    1.94 
  -6   0  16   68.43    2.23 
 -17   1  16    1.87    0.09 
 -15   1  16    3.33    0.14 
 -13   1  16   22.93    0.72 
 -11   1  16    1.32    0.08 
  -9   1  16    2.47    0.12 
  -7   1  16    6.42    0.24 
 -16   2  16    8.73    0.30 
 -14   2  16   13.94    0.46 
 -12   2  16   11.08    0.38 
 -10   2  16    4.64    0.18 
  -8   2  16   35.49    1.16 
 -13   3  16    6.97    0.24 
 -11   3  16    0.02    0.02 
 -12  -2  17    0.06    0.02 
 -10  -2  17    0.05    0.02 
  -8  -2  17    3.56    0.13 
  -6  -2  17    3.62    0.14 
 -15  -1  17    4.04    0.15 
 -13  -1  17    0.90    0.06 
 -11  -1  17    0.20    0.03 
  -9  -1  17    0.66    0.05 
  -7  -1  17    0.63    0.05 
 -14   0  17   -0.02    0.02 
 -12   0  17    0.00    0.02 
 -10   0  17   -0.03    0.02 
  -8   0  17    0.05    0.02 
 -13   1  17    0.88    0.06 
 -11   1  17    0.14    0.03 
  -9   1  17    0.67    0.05 
 -12   2  17    0.04    0.02 
 -10   2  17    0.02    0.02 
   0   0   0    0.00    0.00 
; 
_shelx_hkl_checksum   49500 
  
